# Supplementary material for: Identifying attacks in the Russia–Ukraine conflict using seismic array data
Source: Springer Nature journal article supplement (doi:10.1038/s41586-023-06416-7), 2023-08-30

**Supplementary information**

---

**Identifying attacks in the Russia–Ukraine conflict using seismic array data**

---

In the format provided by the authors and unedited

# Chernihiv point spread function

Origin time: 2022-01-01 00:03:01.750

Hypocentre: 51.4454°N  
31.1406°E

Location error: 13.04 km

Uncertainty ellipse: 120.00 km (semi-major axis)  
37.00 km (semi-minor axis)

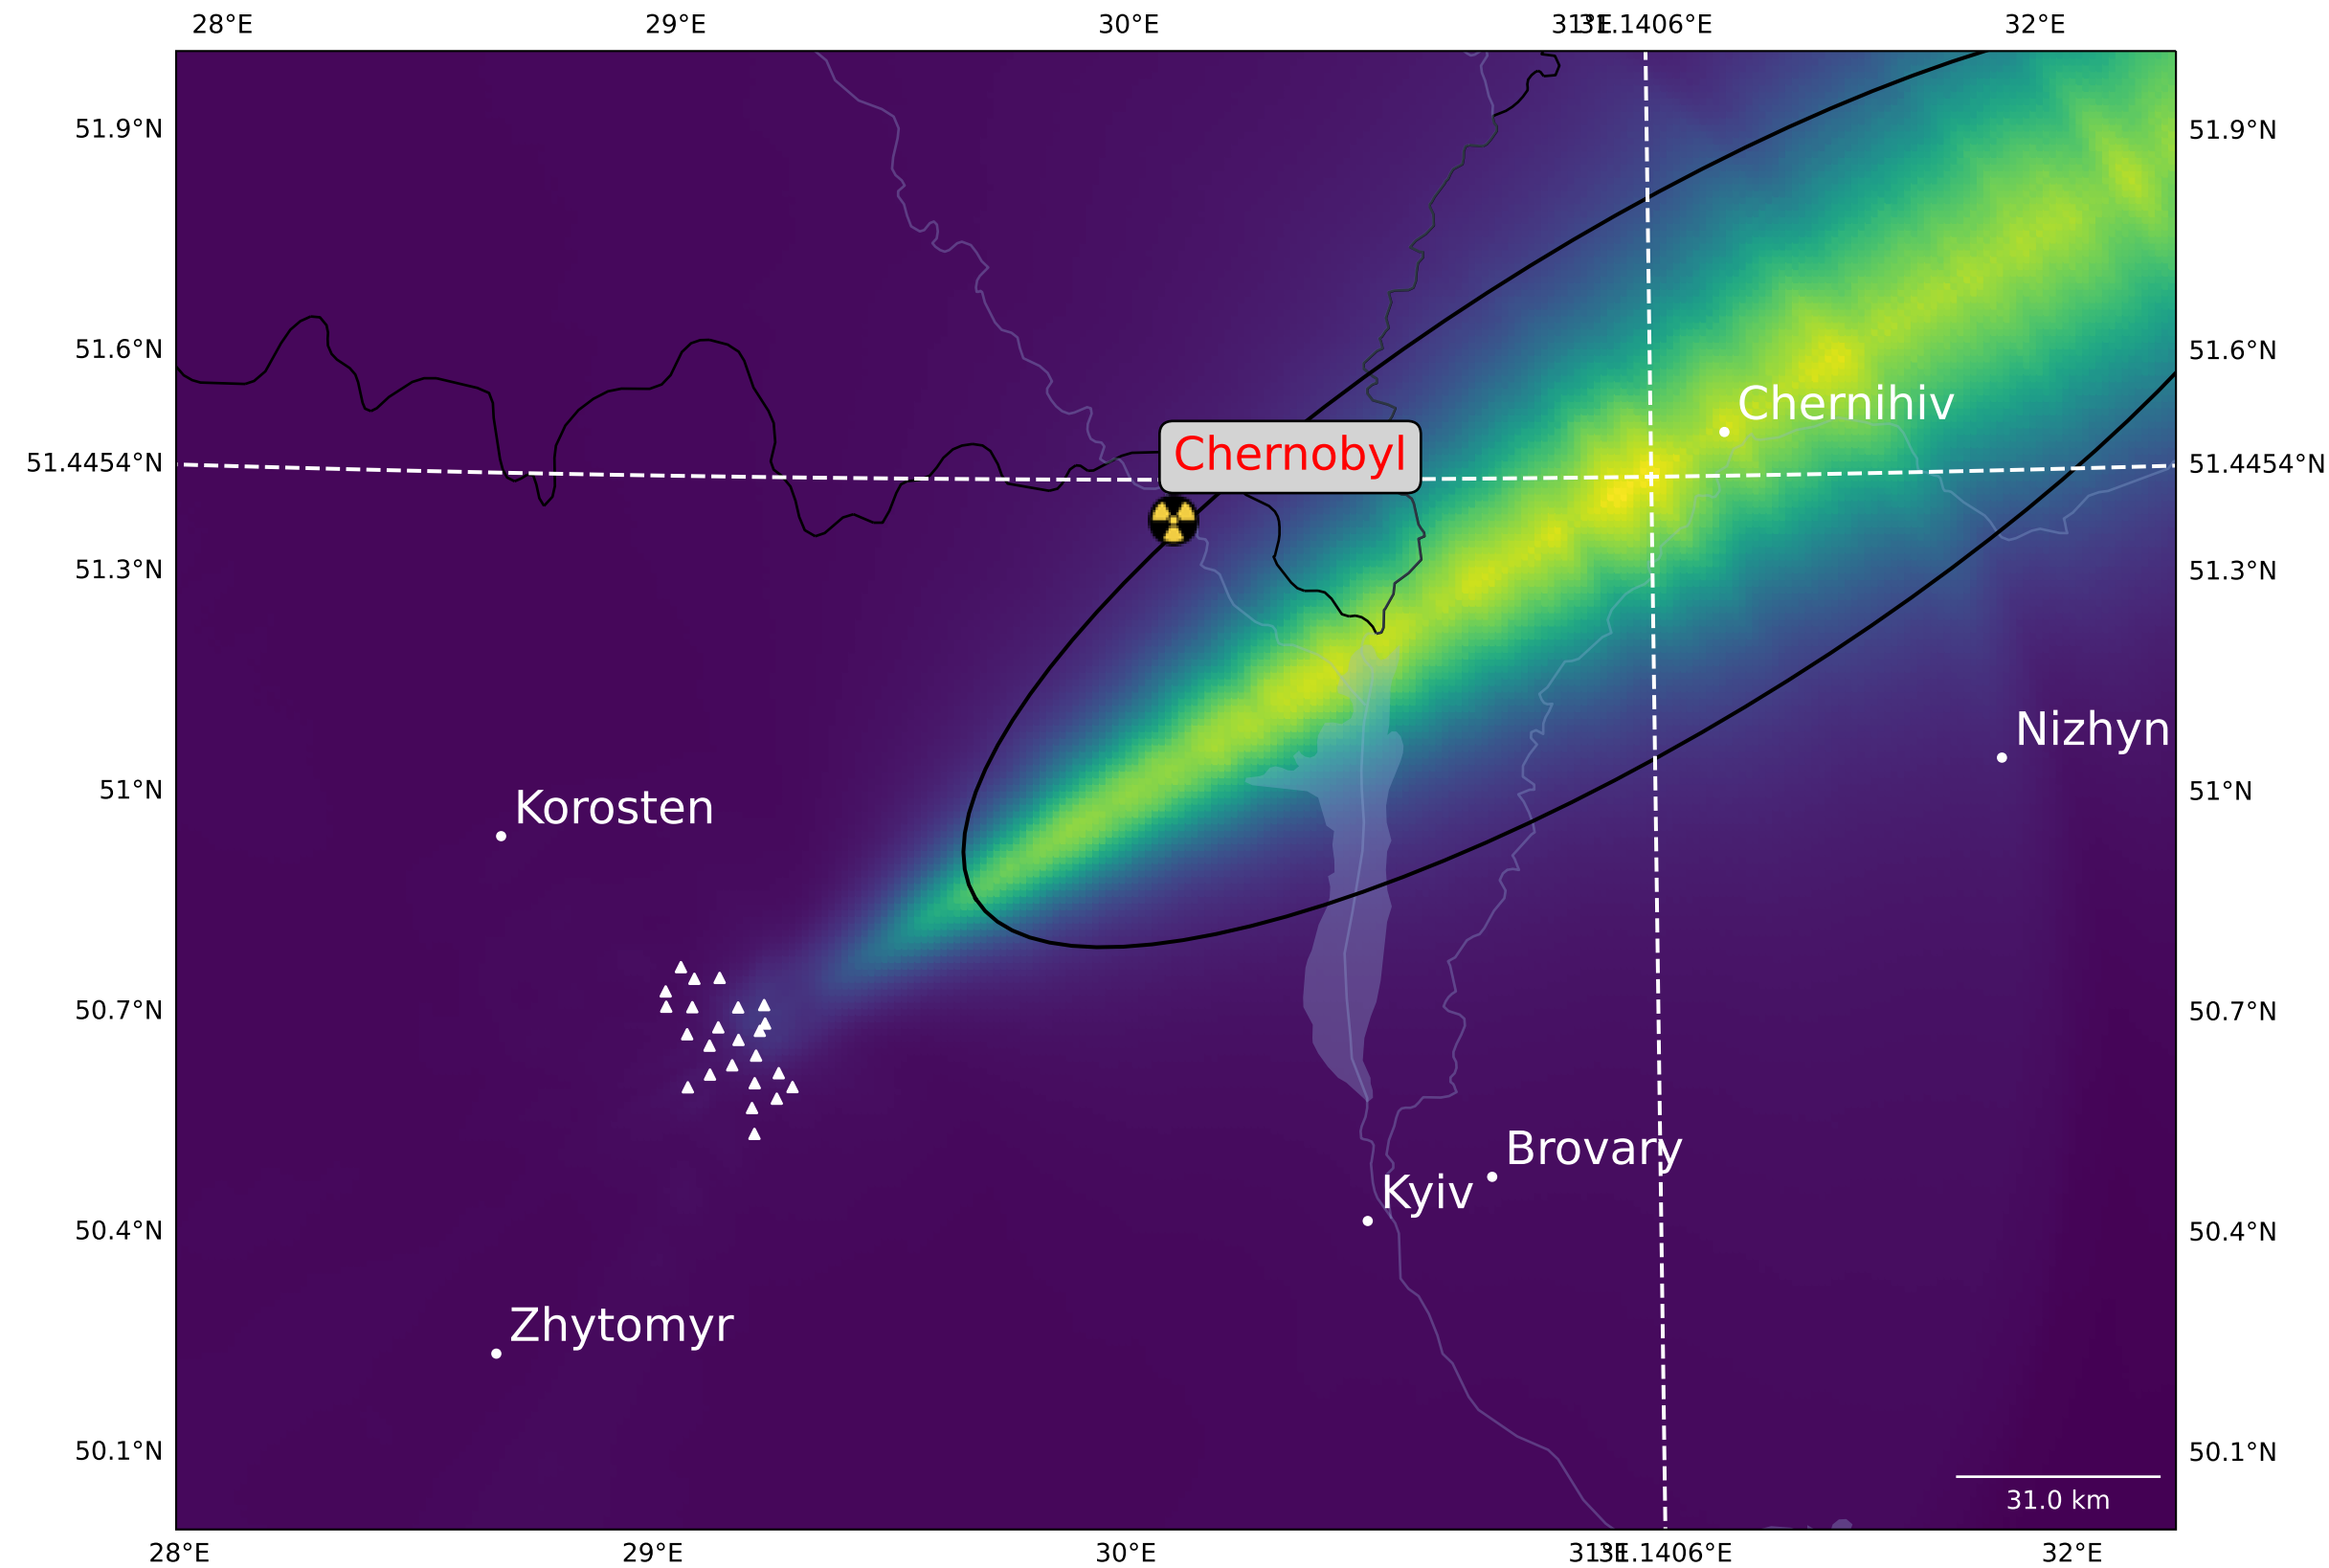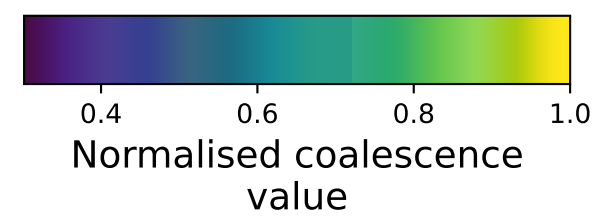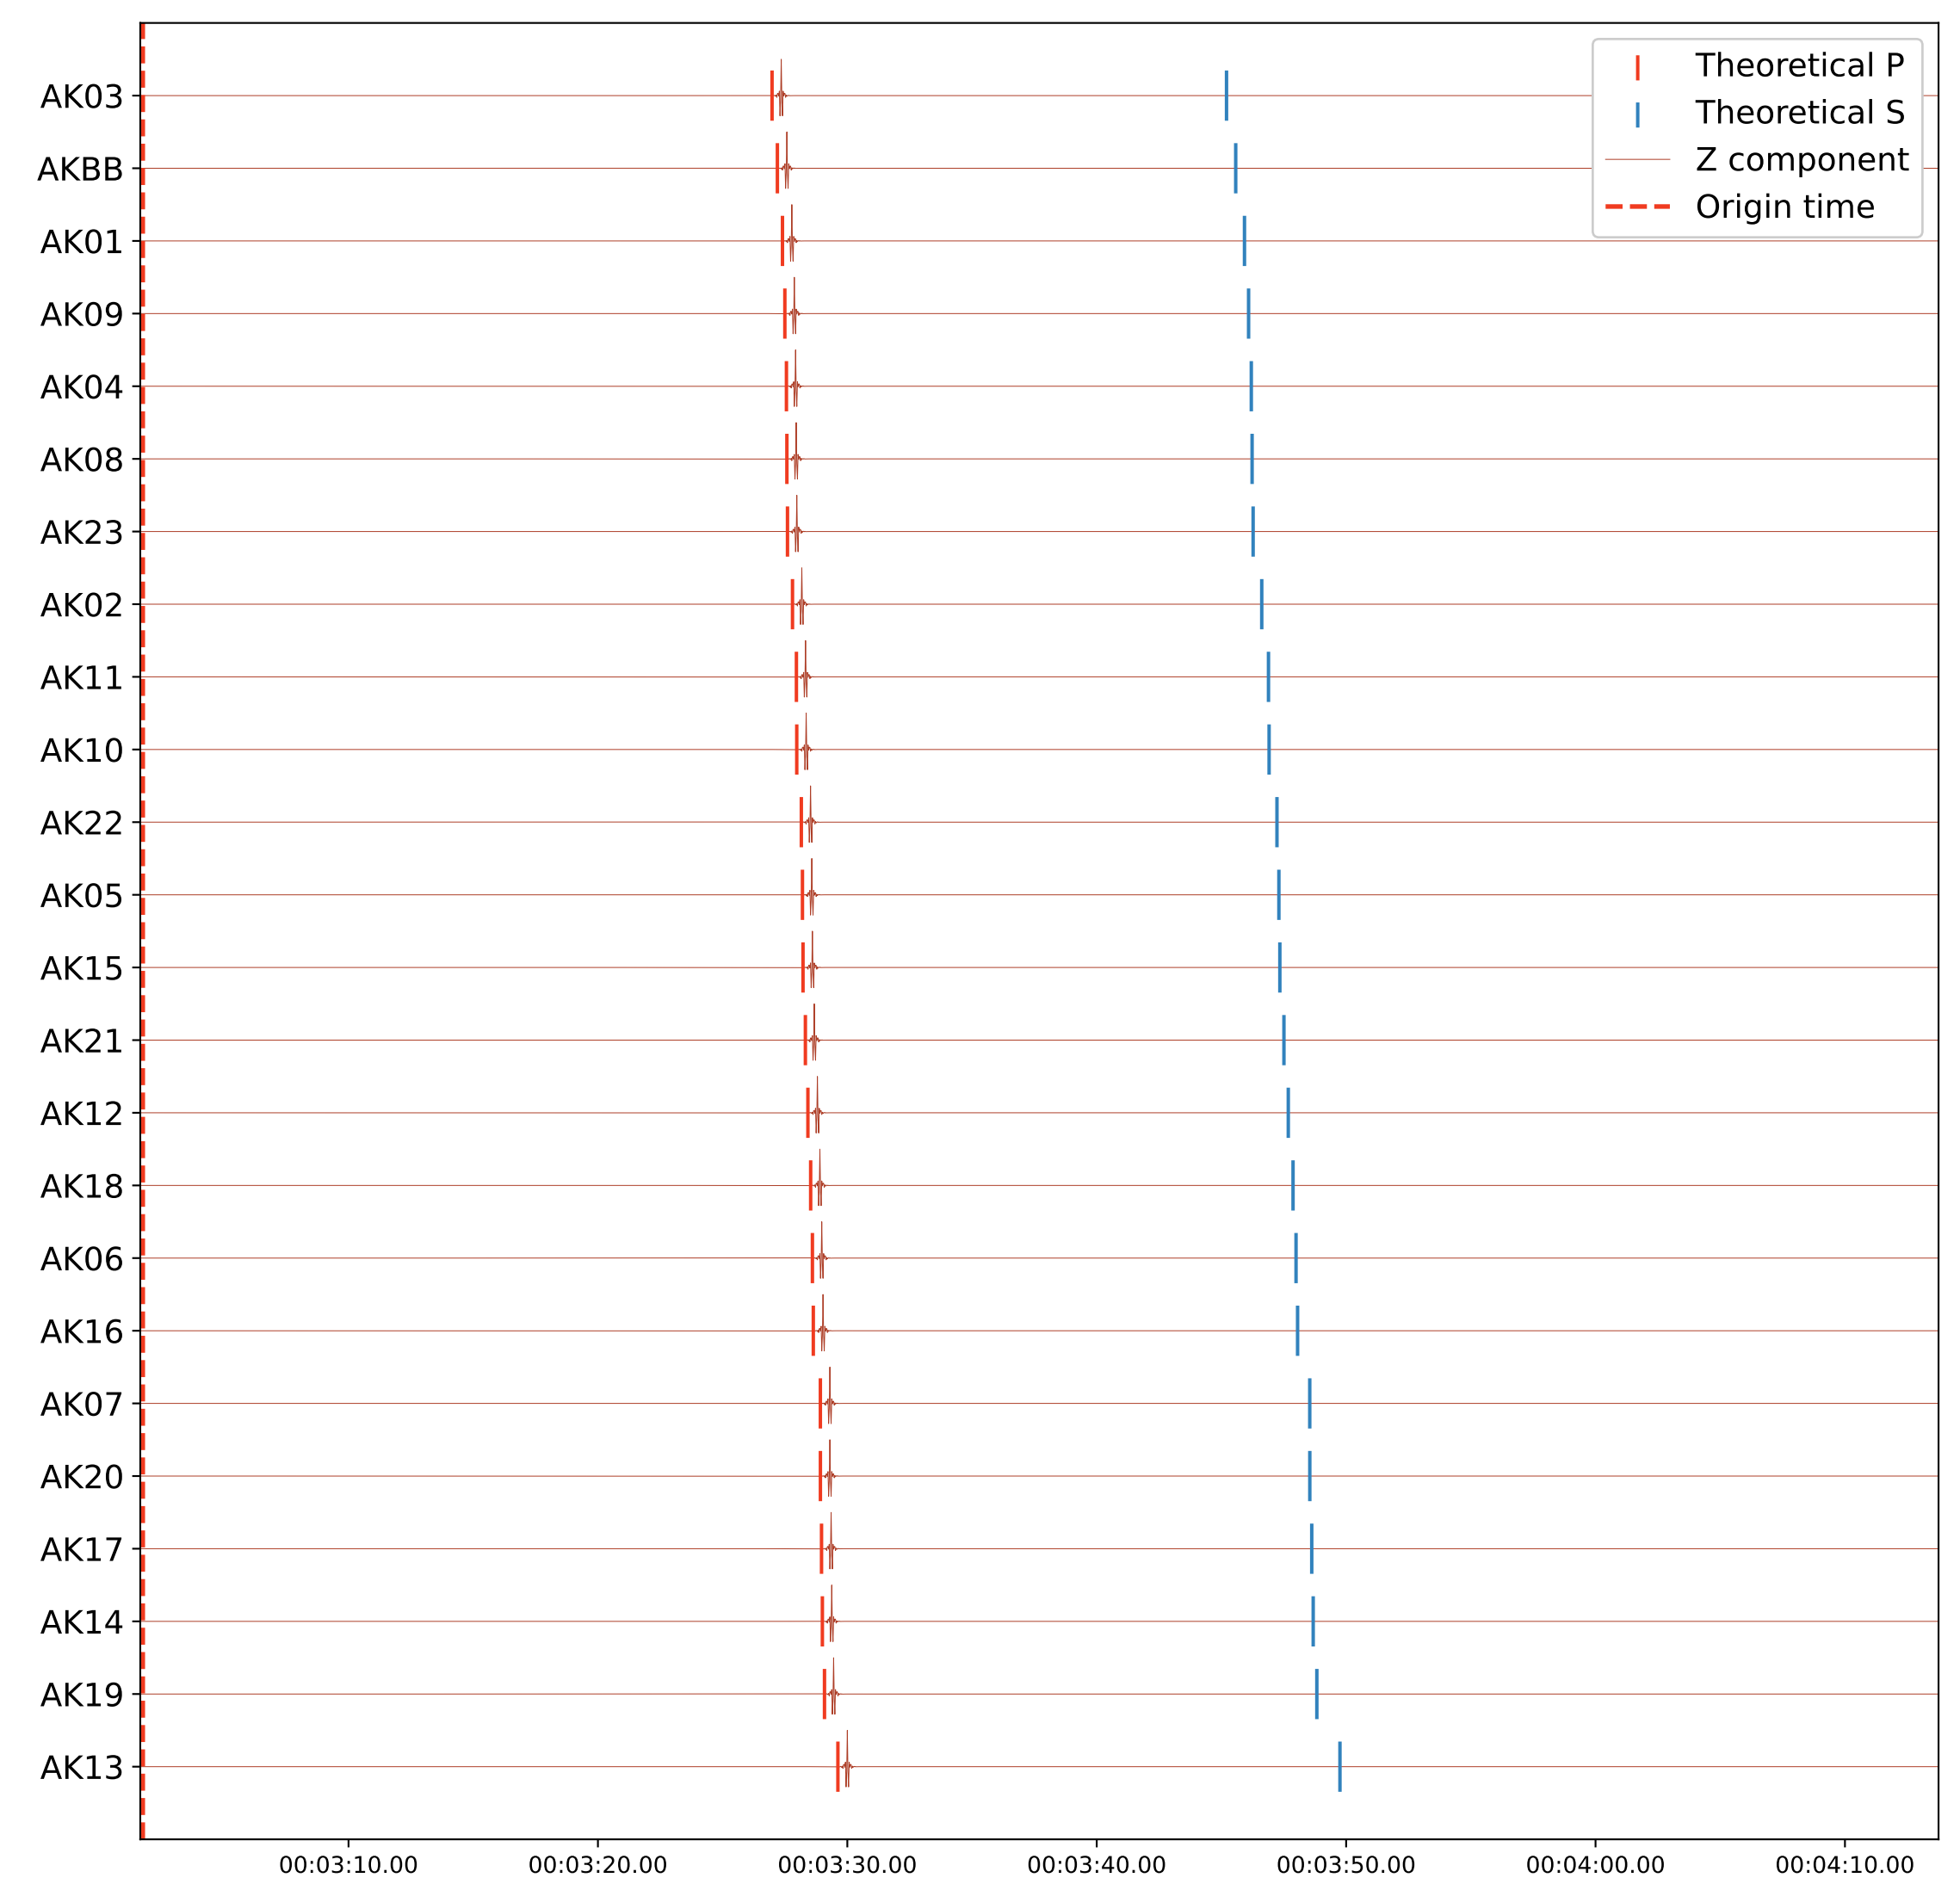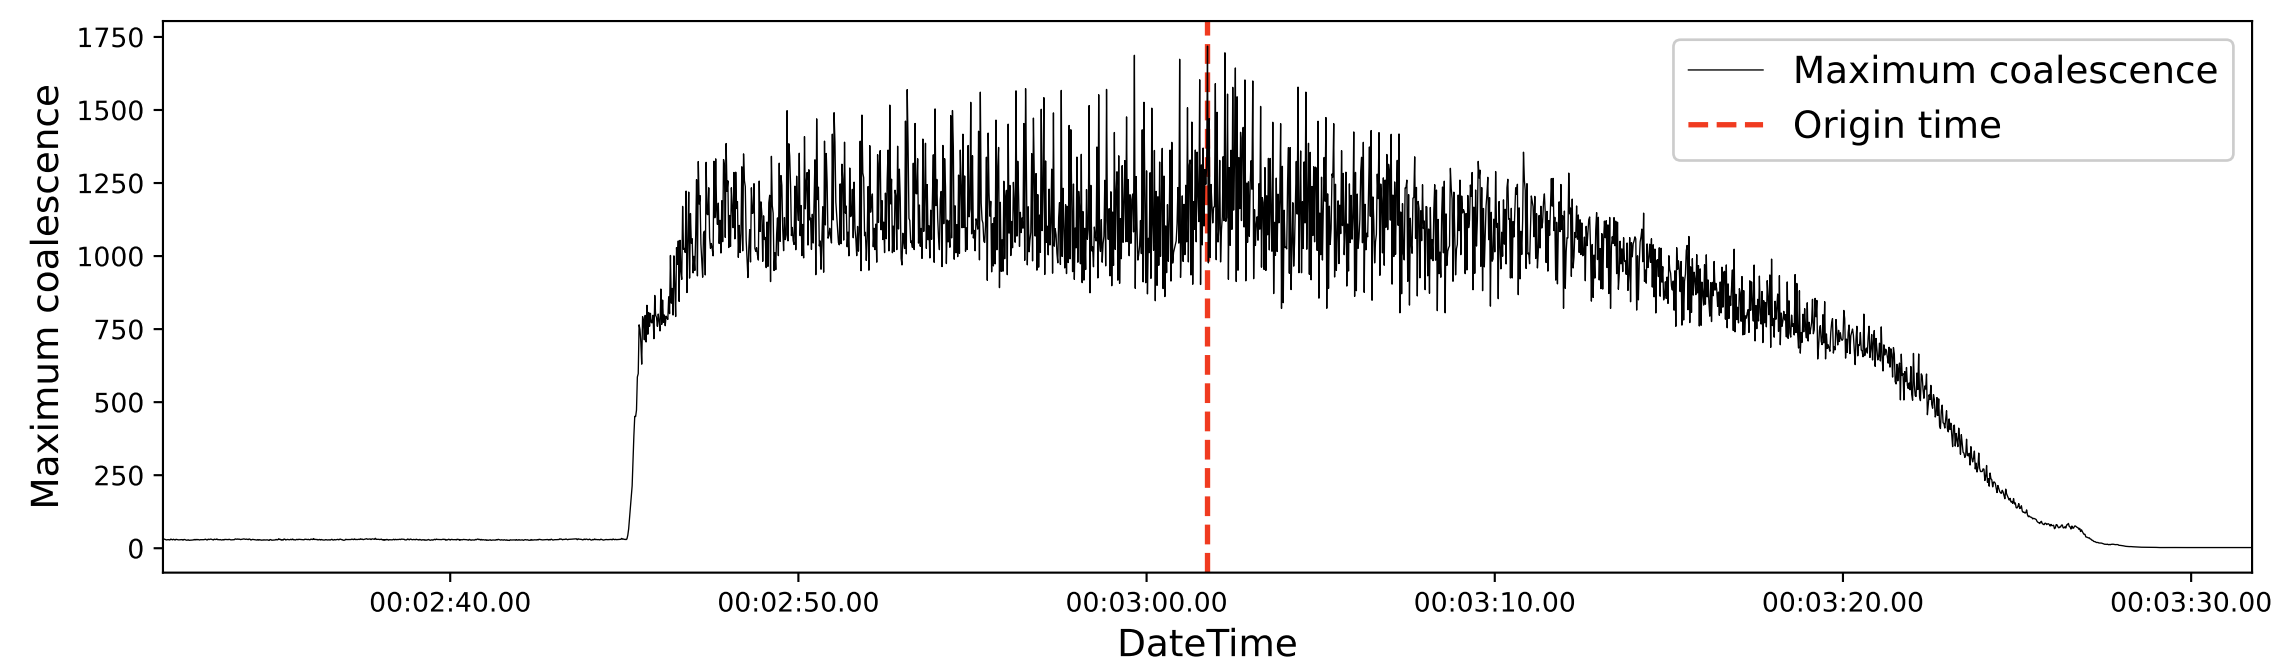

# Chernihiv point spread function

Origin time: 2022-01-01 00:02:59.650  
 Hypocentre: 51.5069°N  
 31.3003°E  
 Location error: 0.00 km  
 Uncertainty ellipse: 120.00 km (semi-major axis)  
 27.00 km (semi-minor axis)

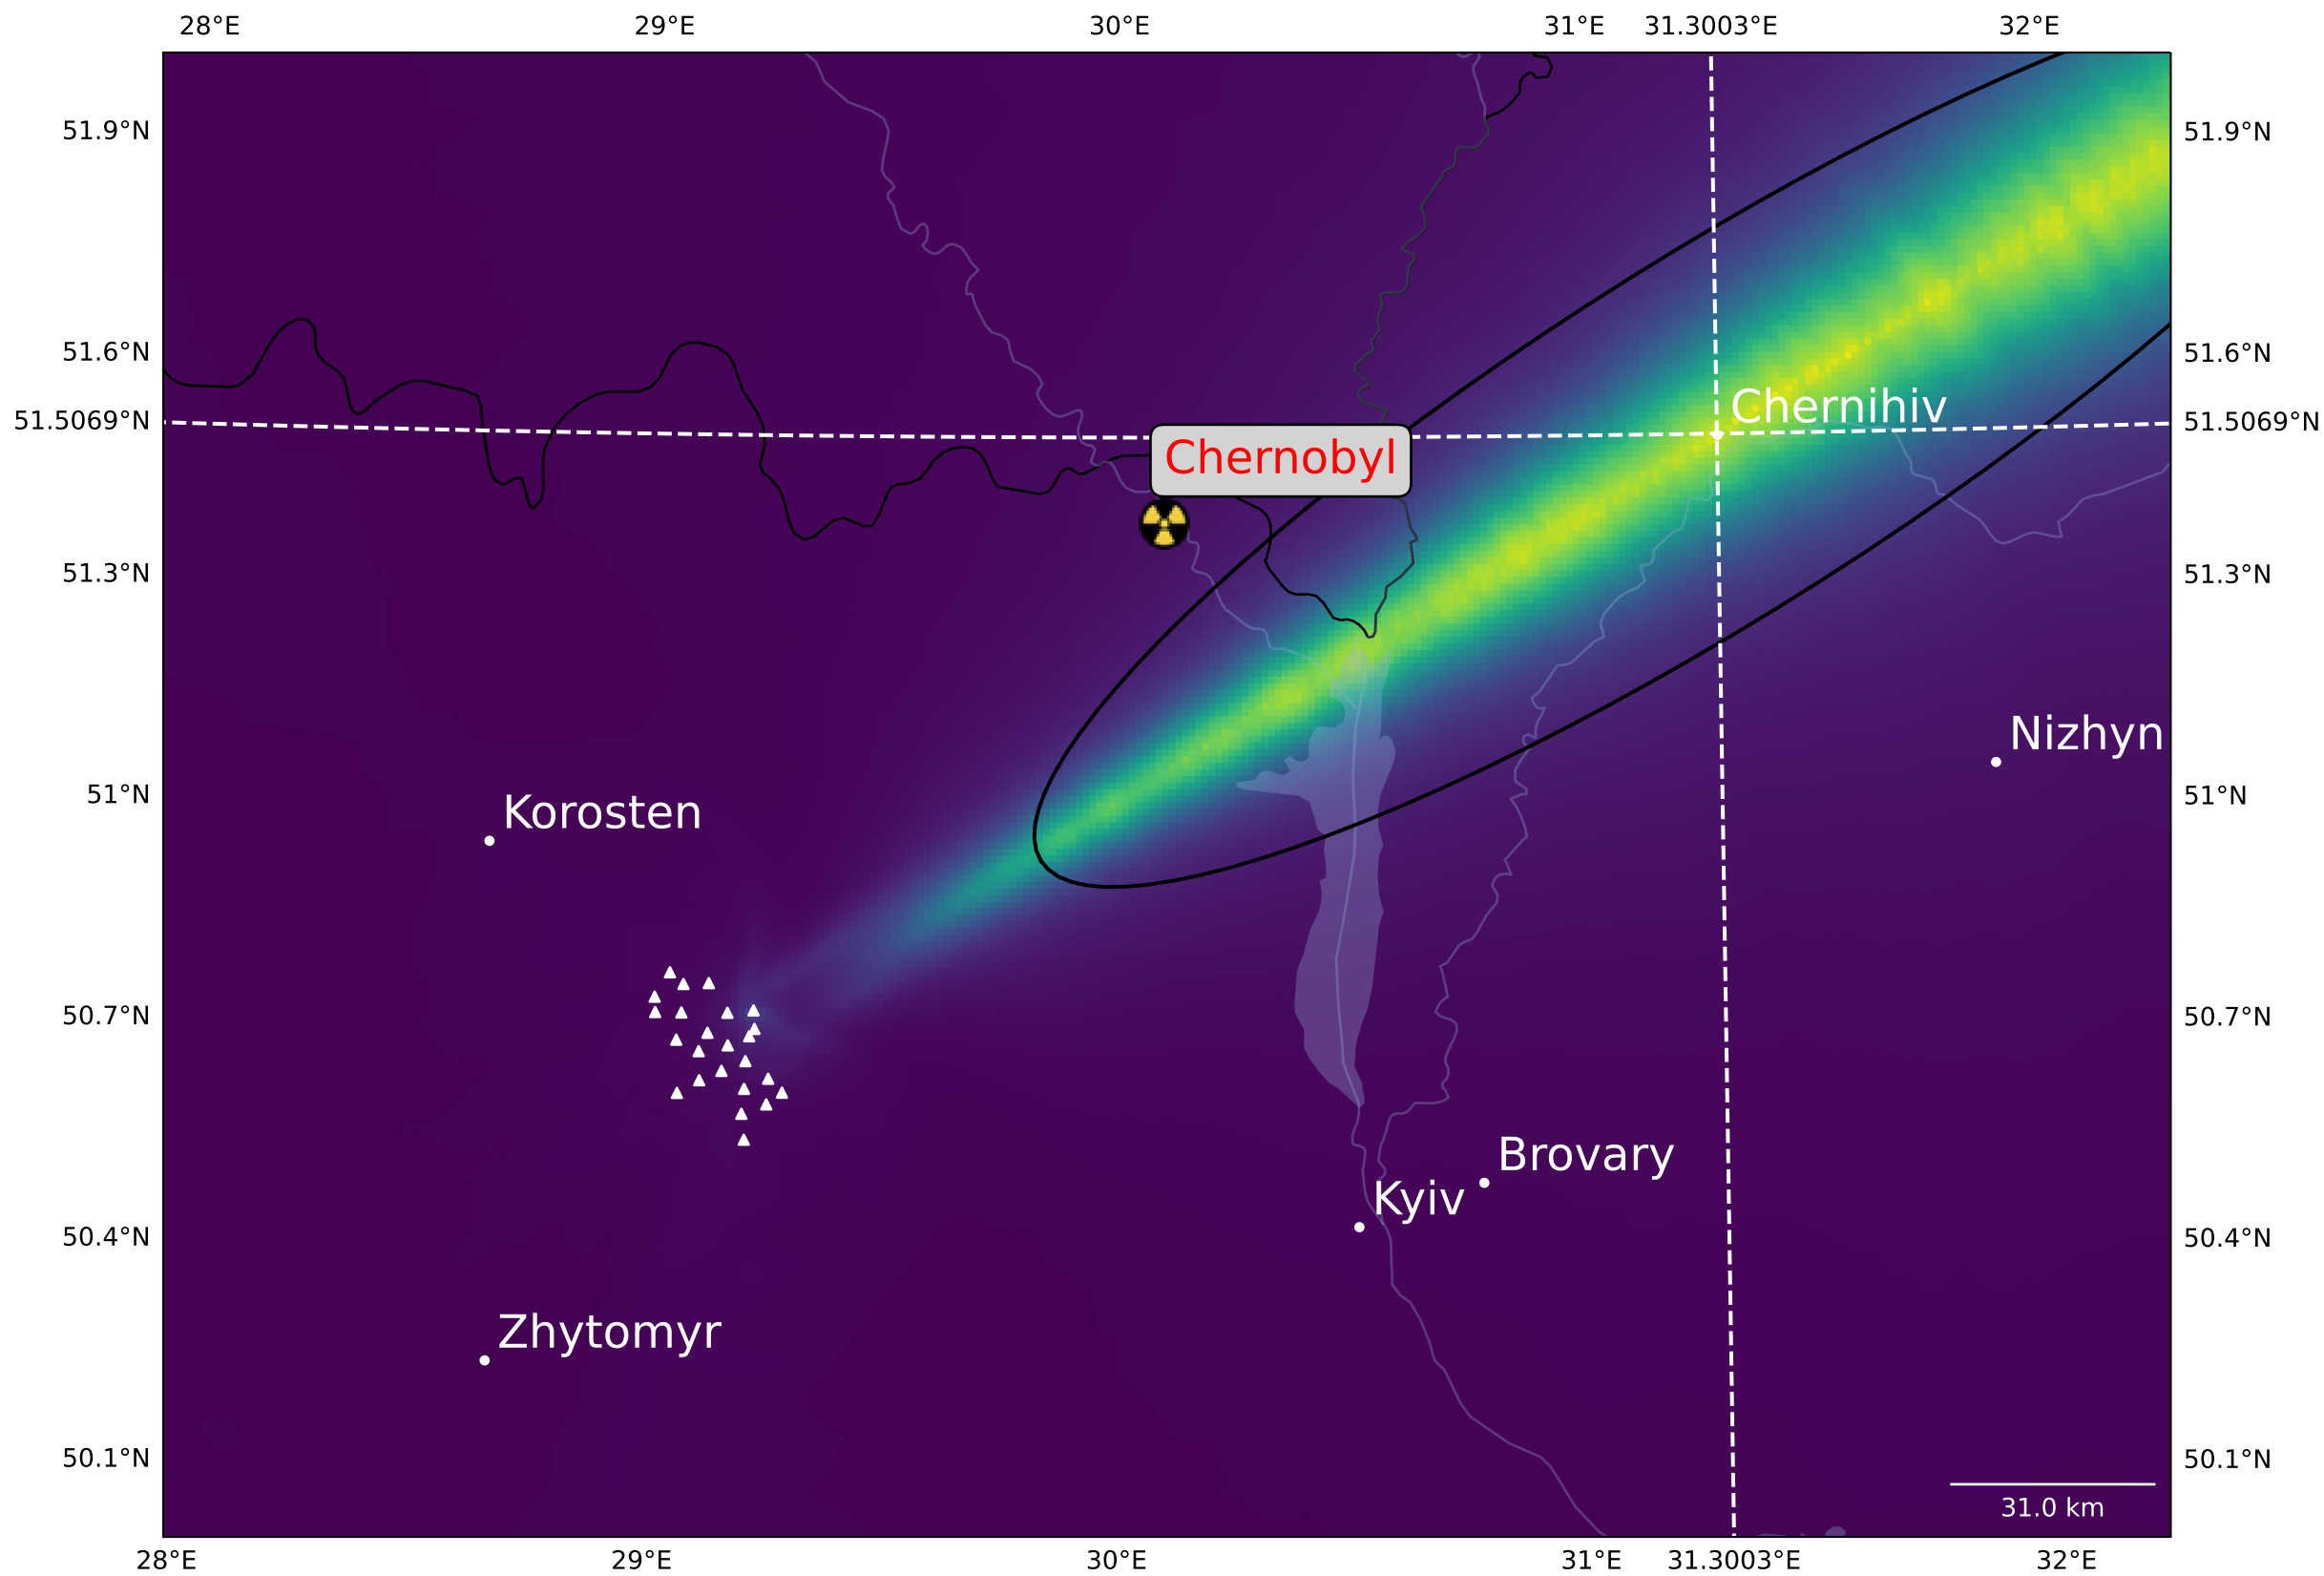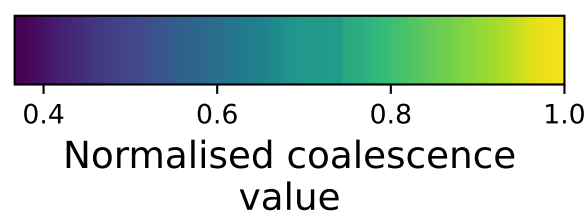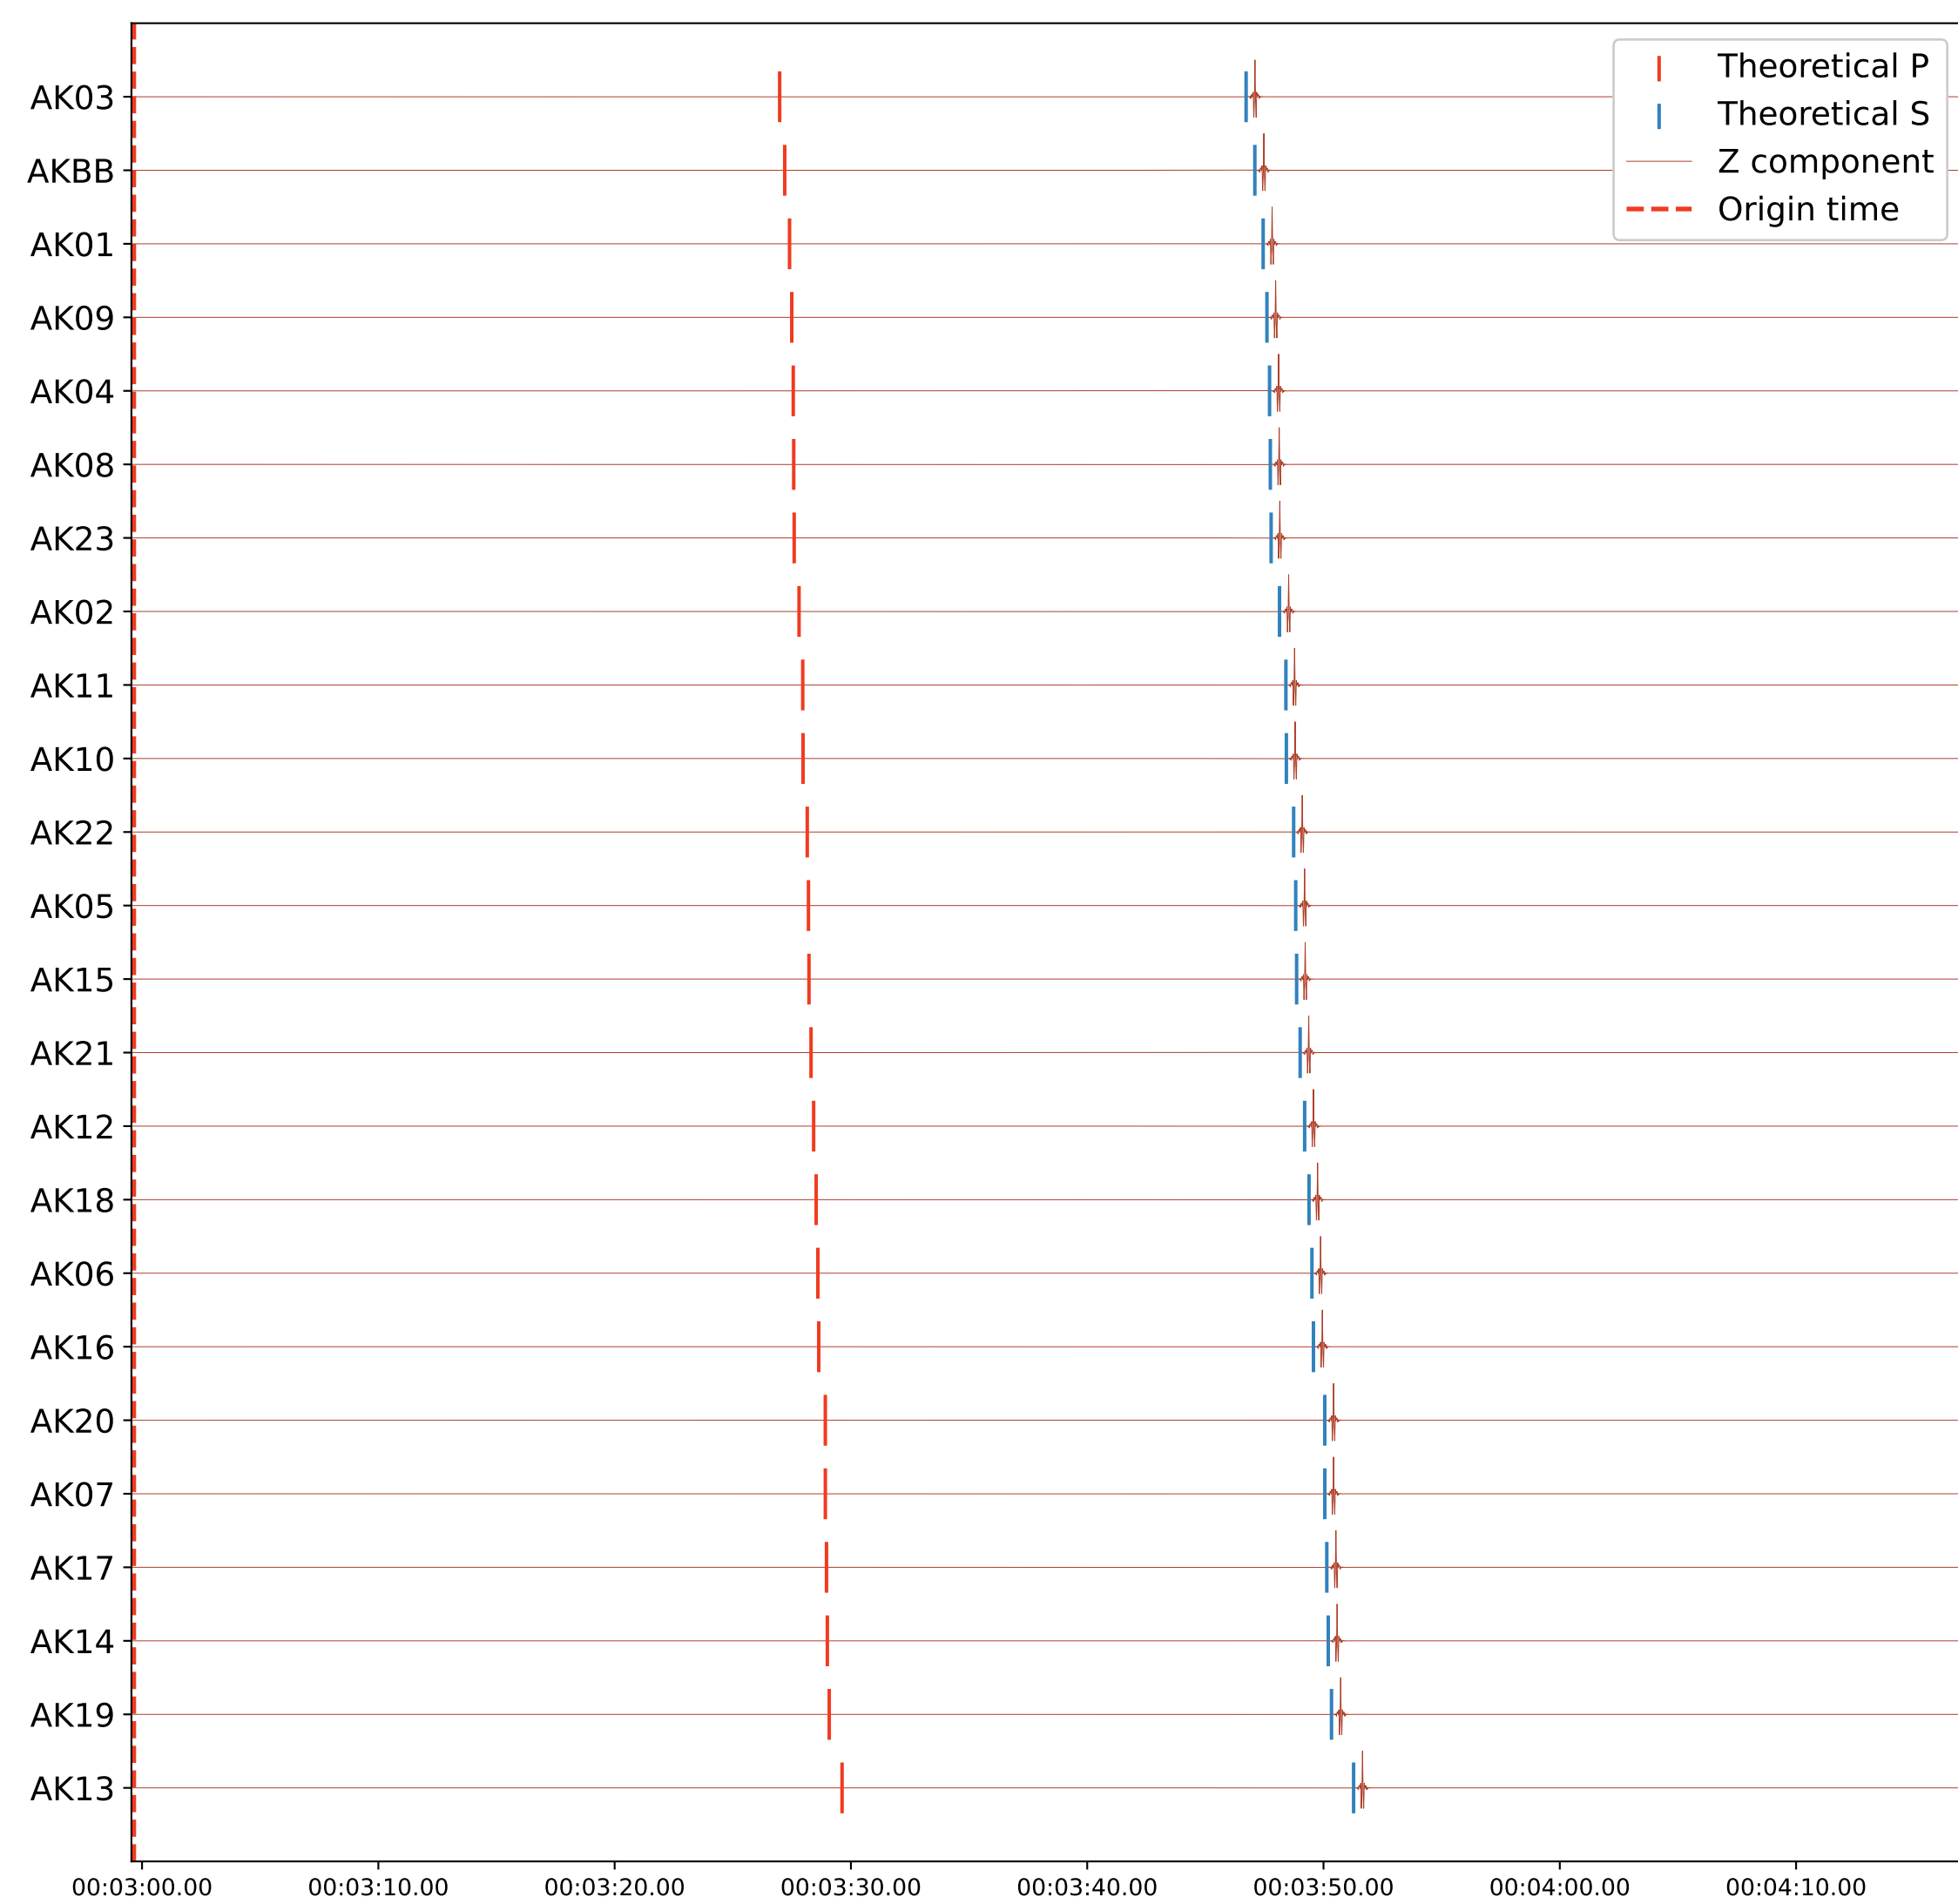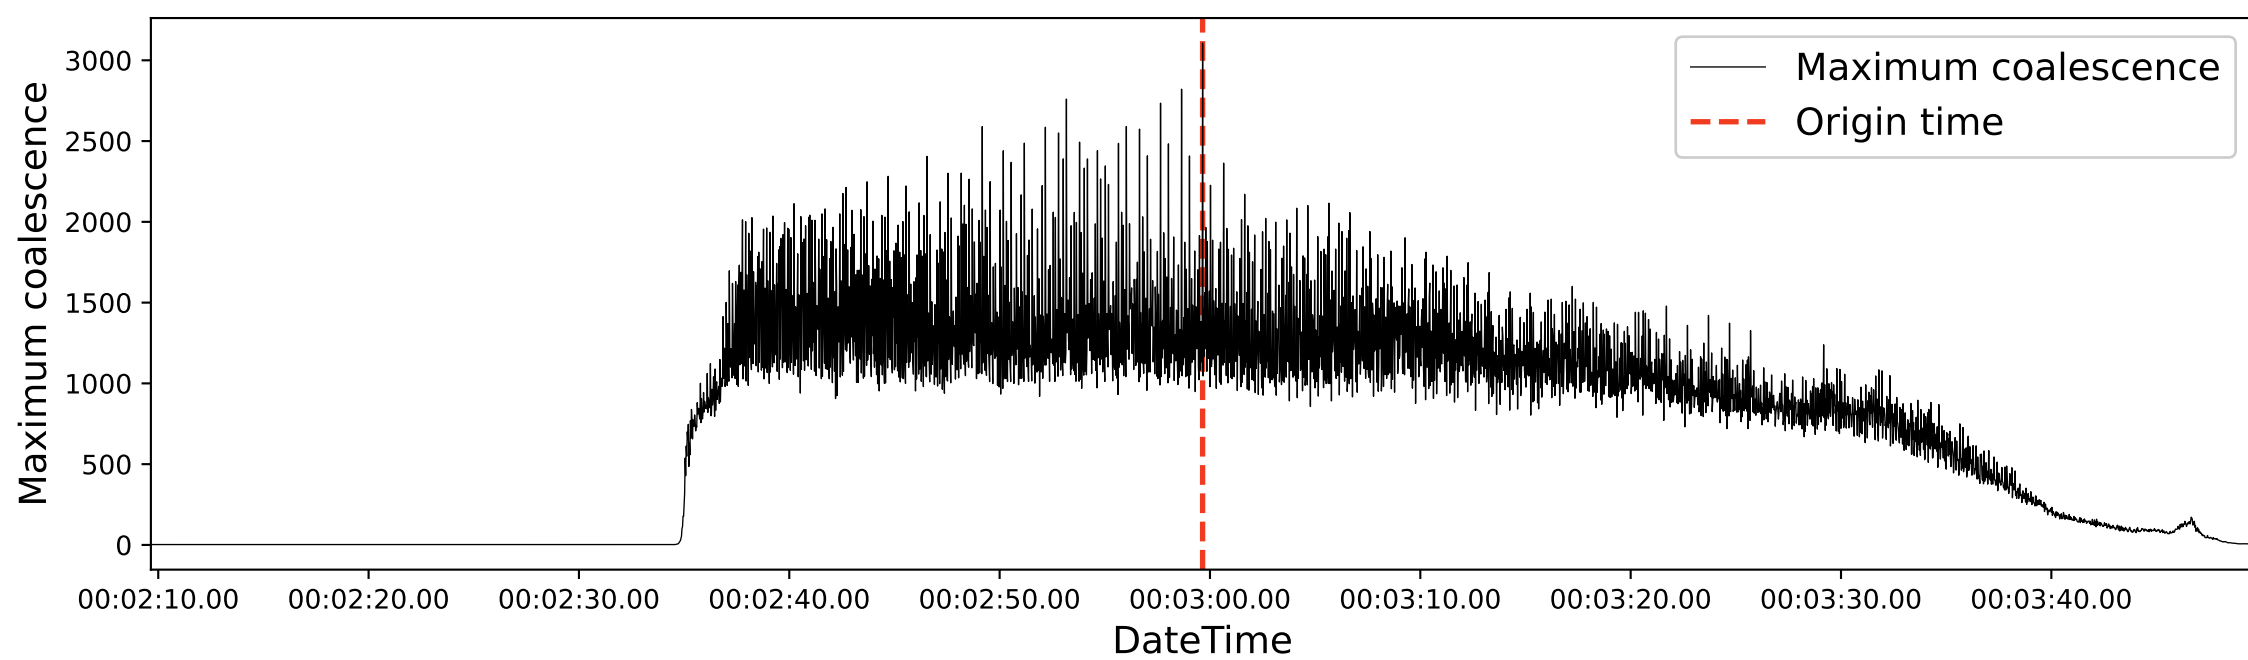

# Chernihiv point spread function

Origin time: 2022-01-01 00:02:59.650

Hypocentre: 51.5069°N  
31.3003°E

Location error: 0.00 km

Uncertainty ellipse: 4.70 km (semi-major axis)  
1.20 km (semi-minor axis)

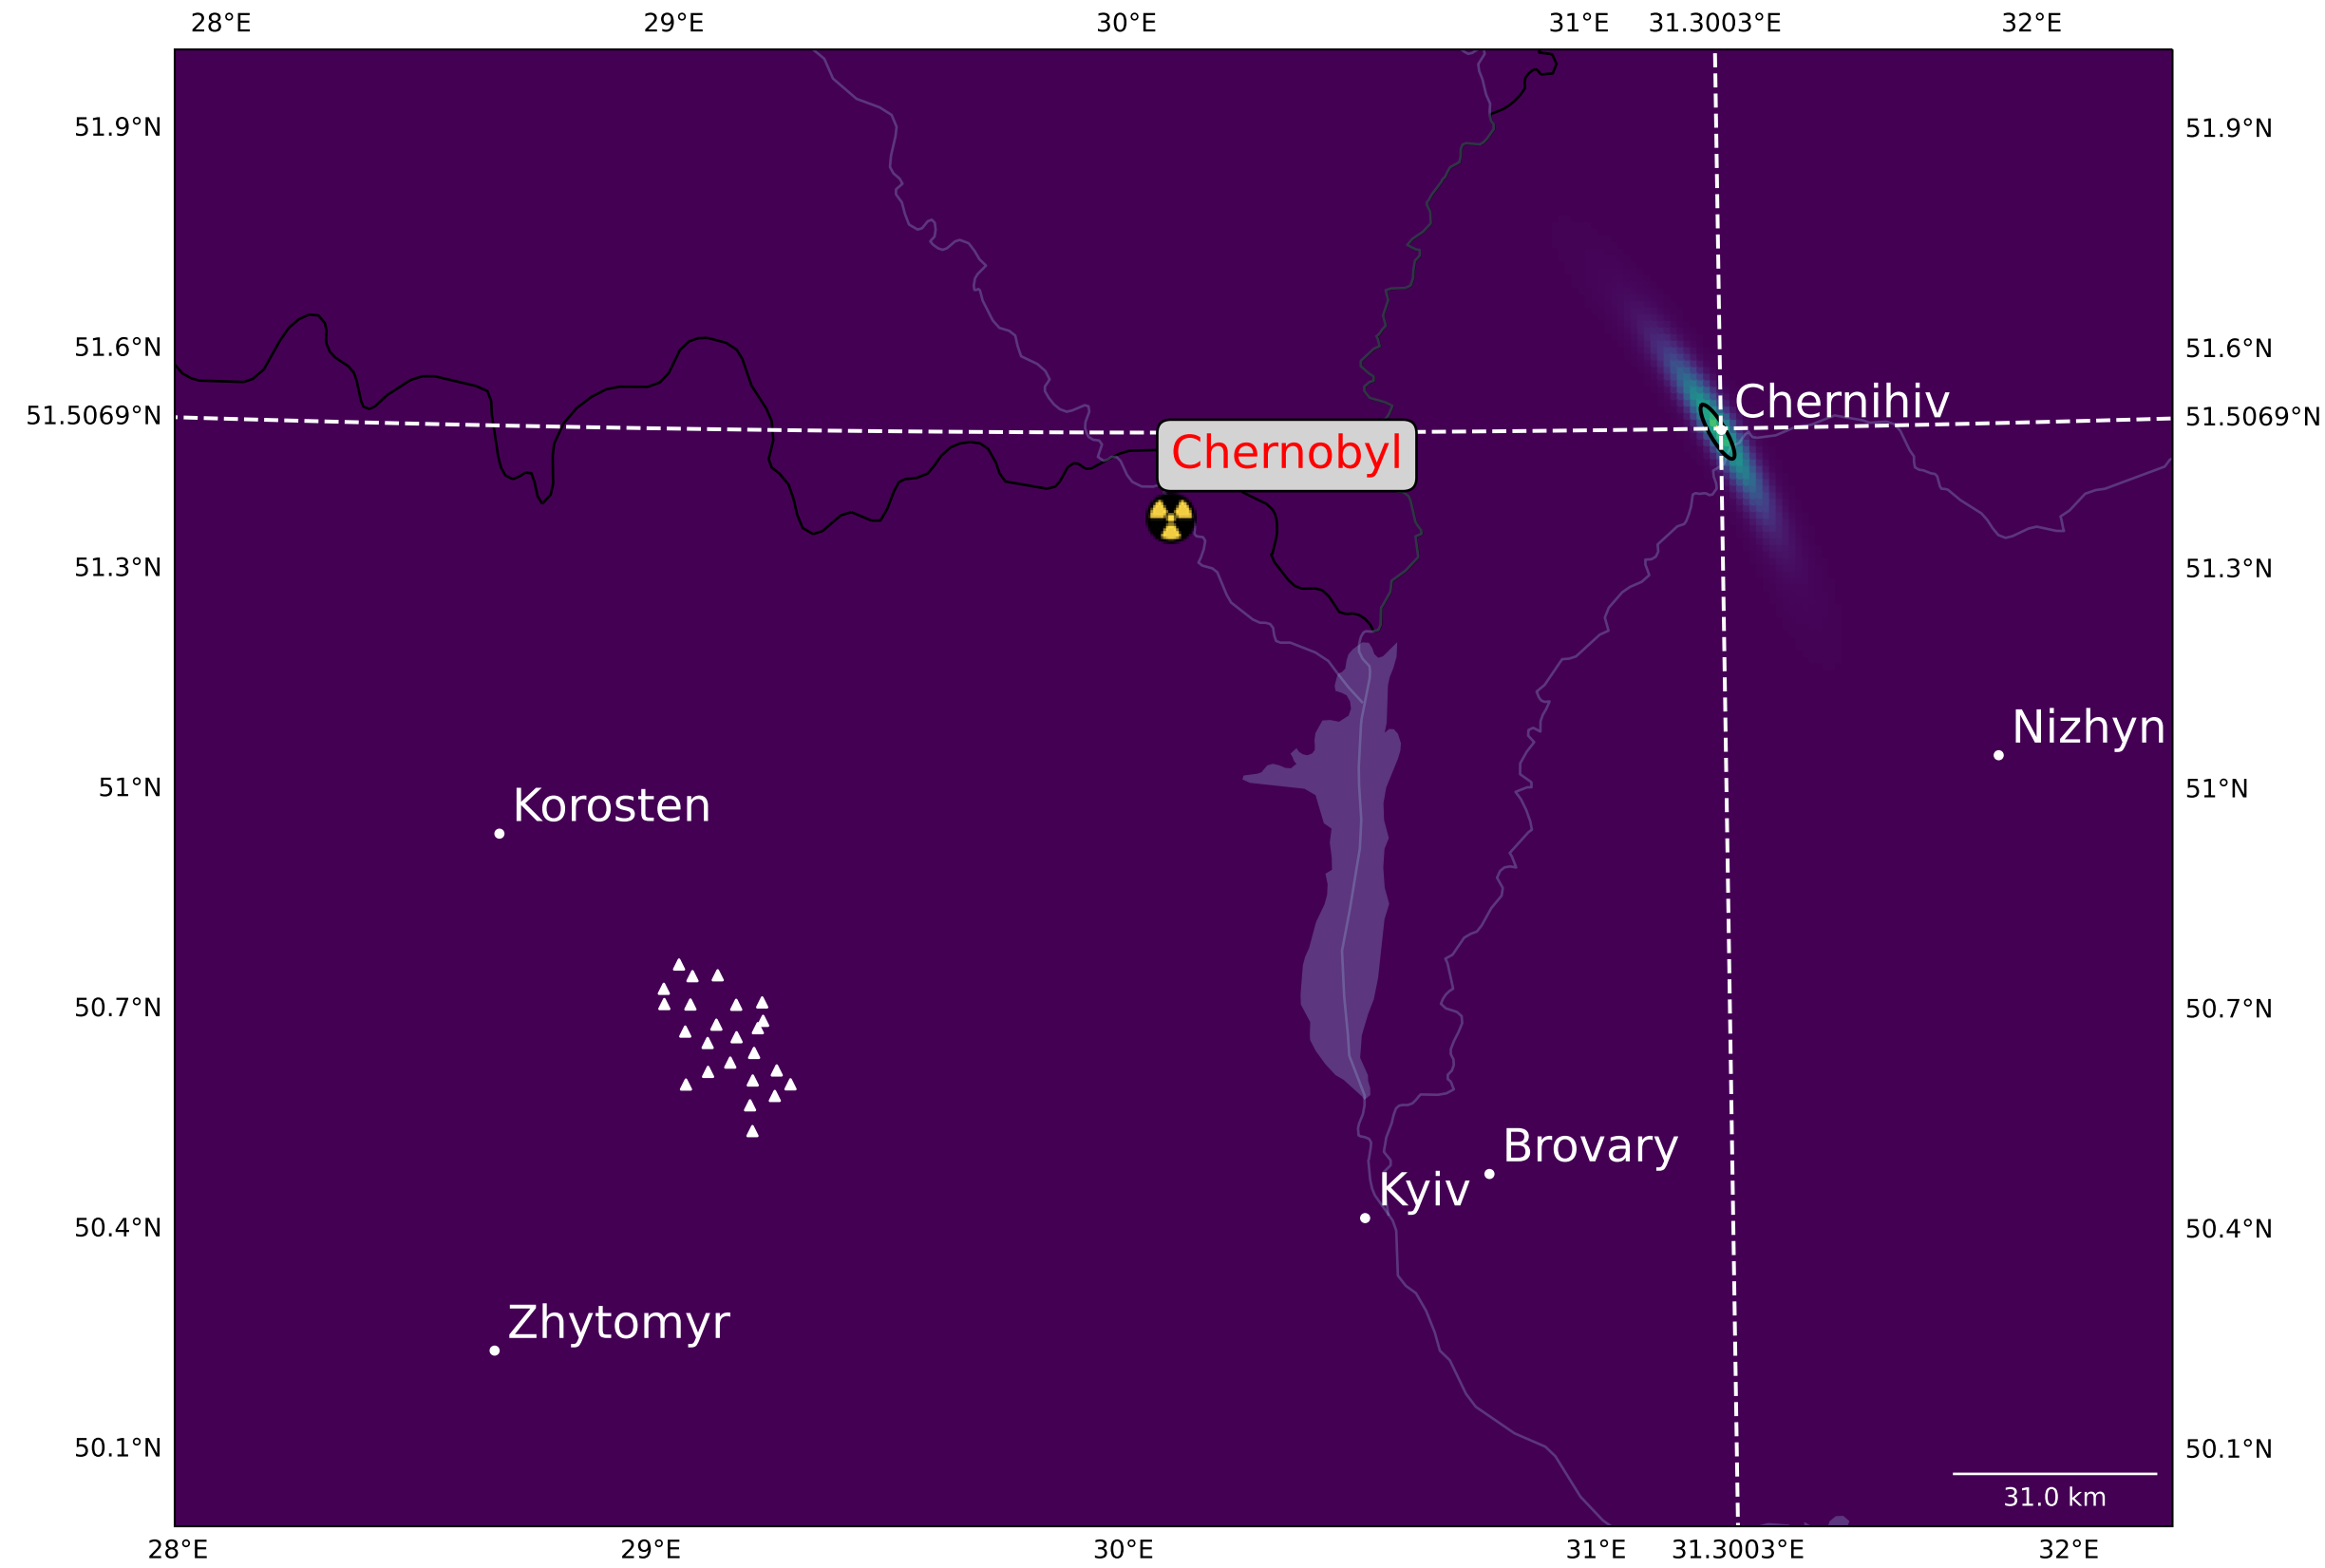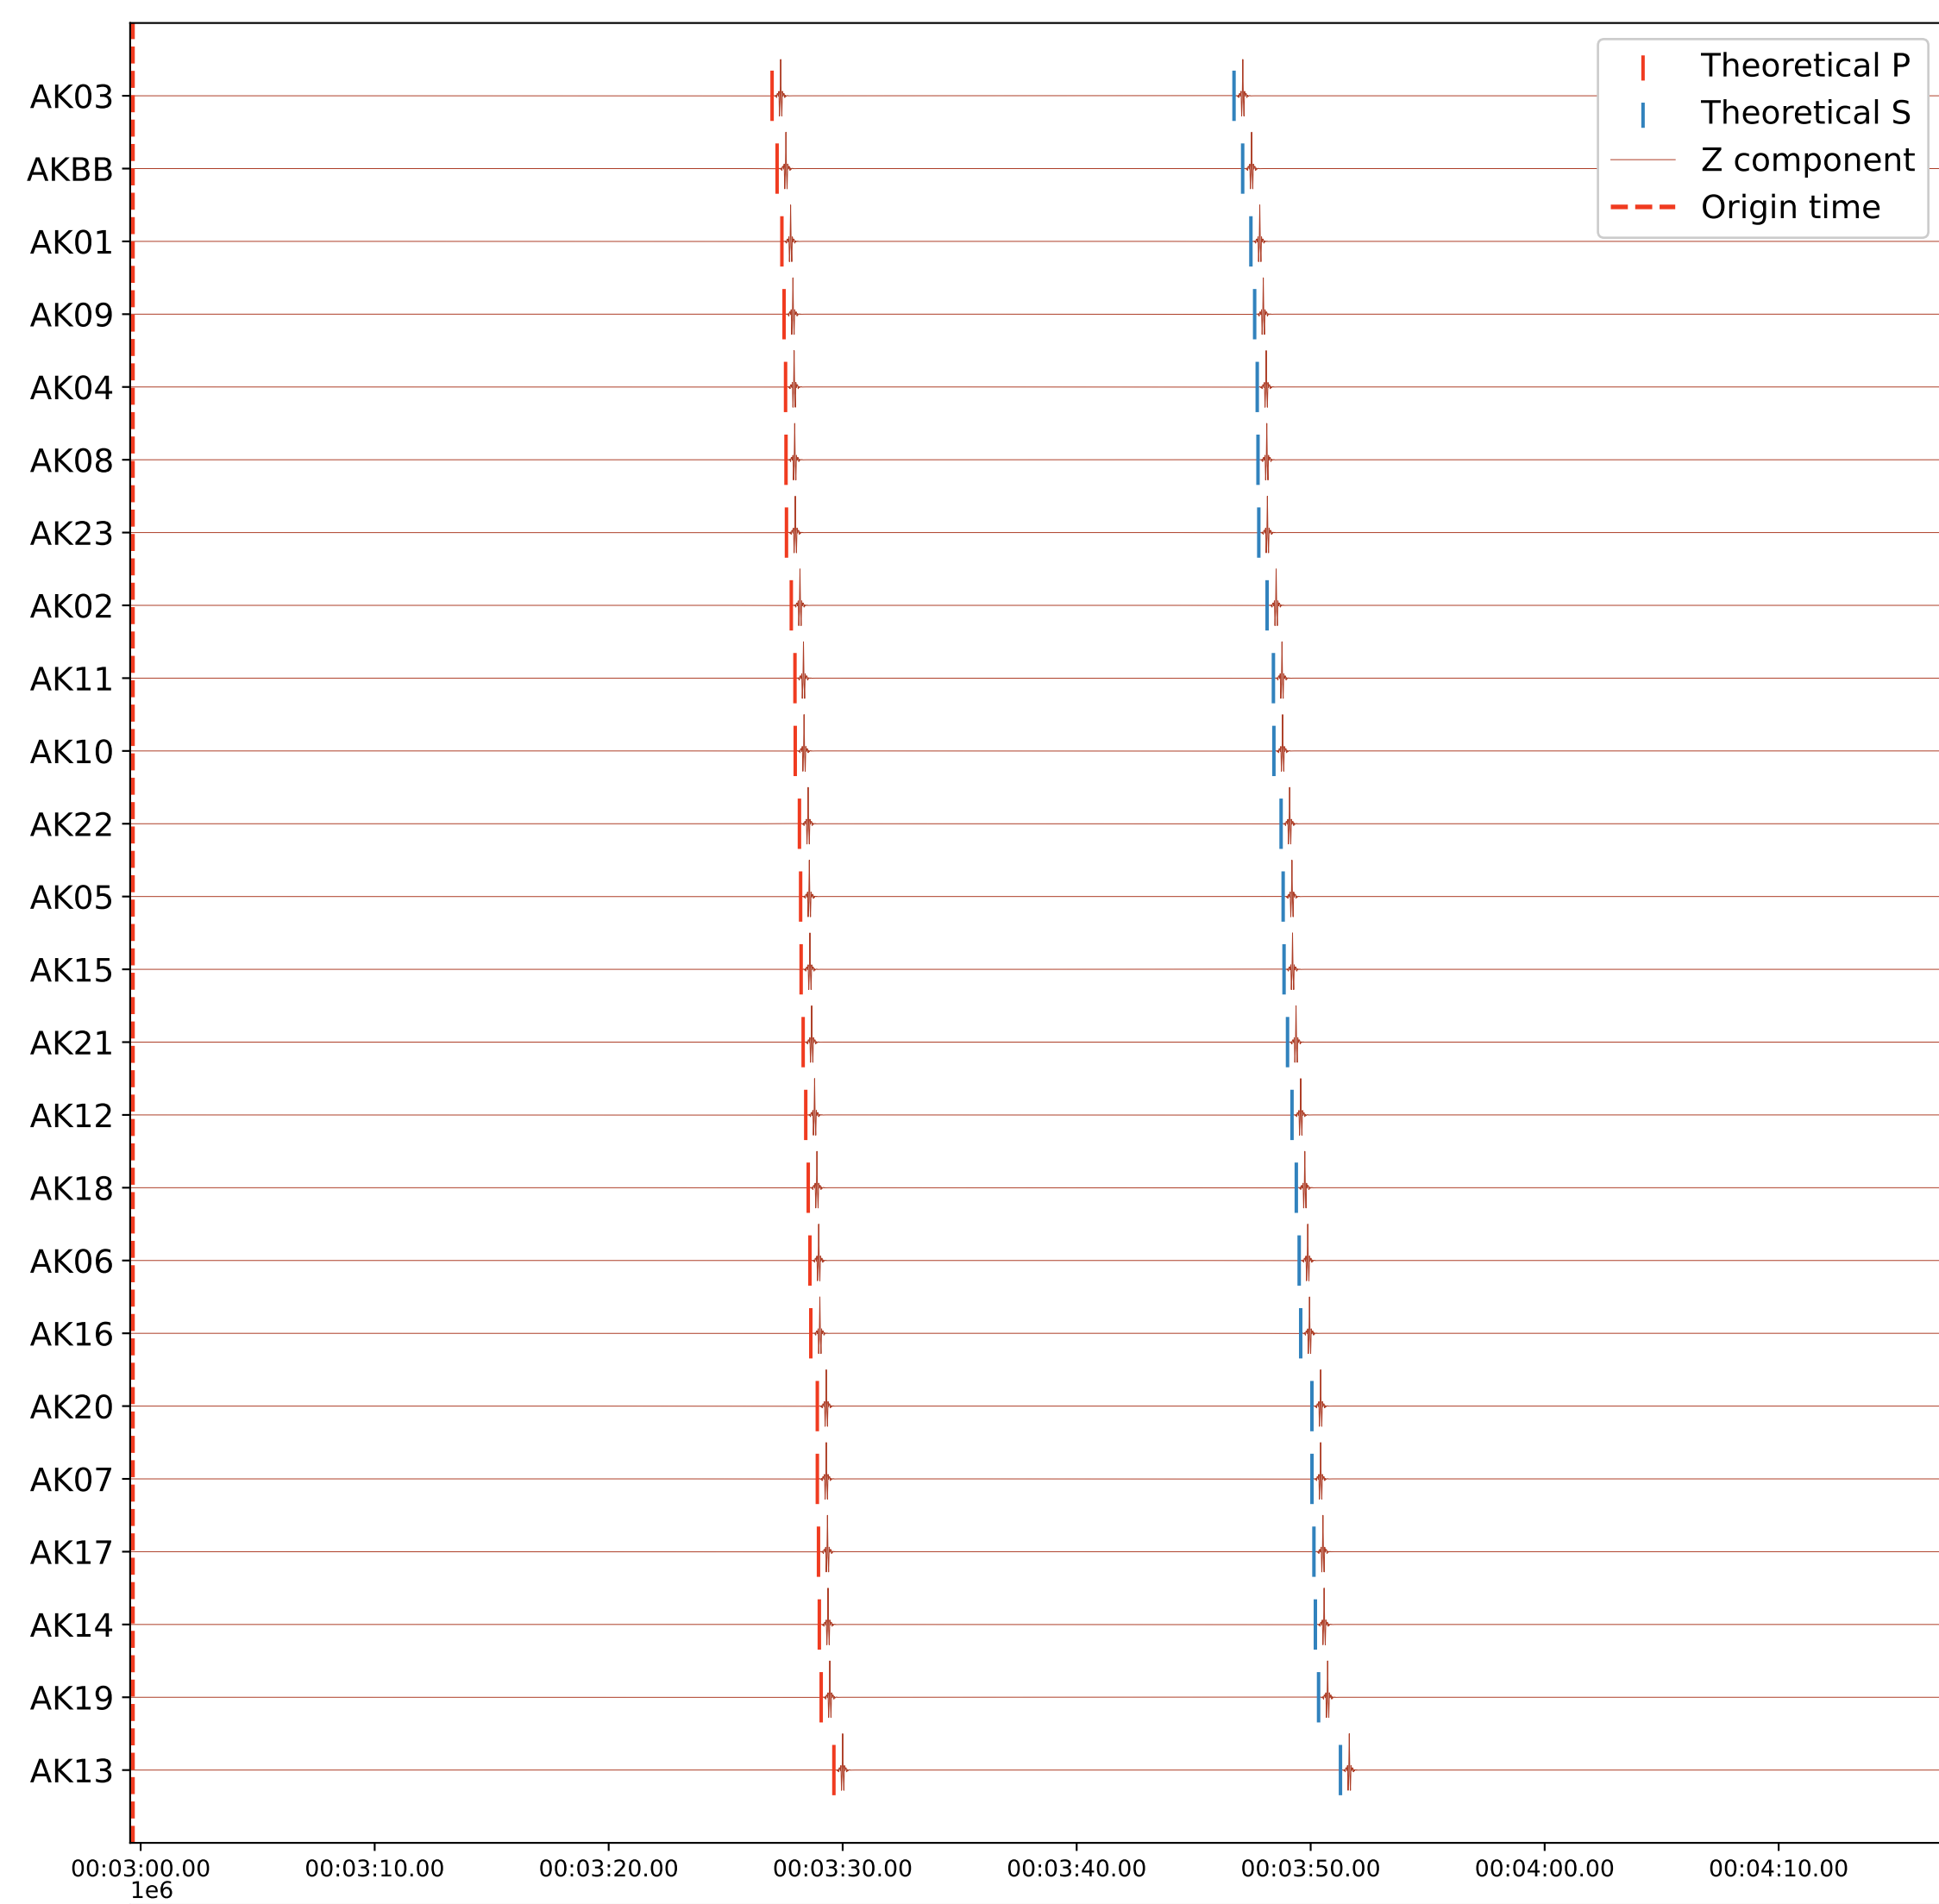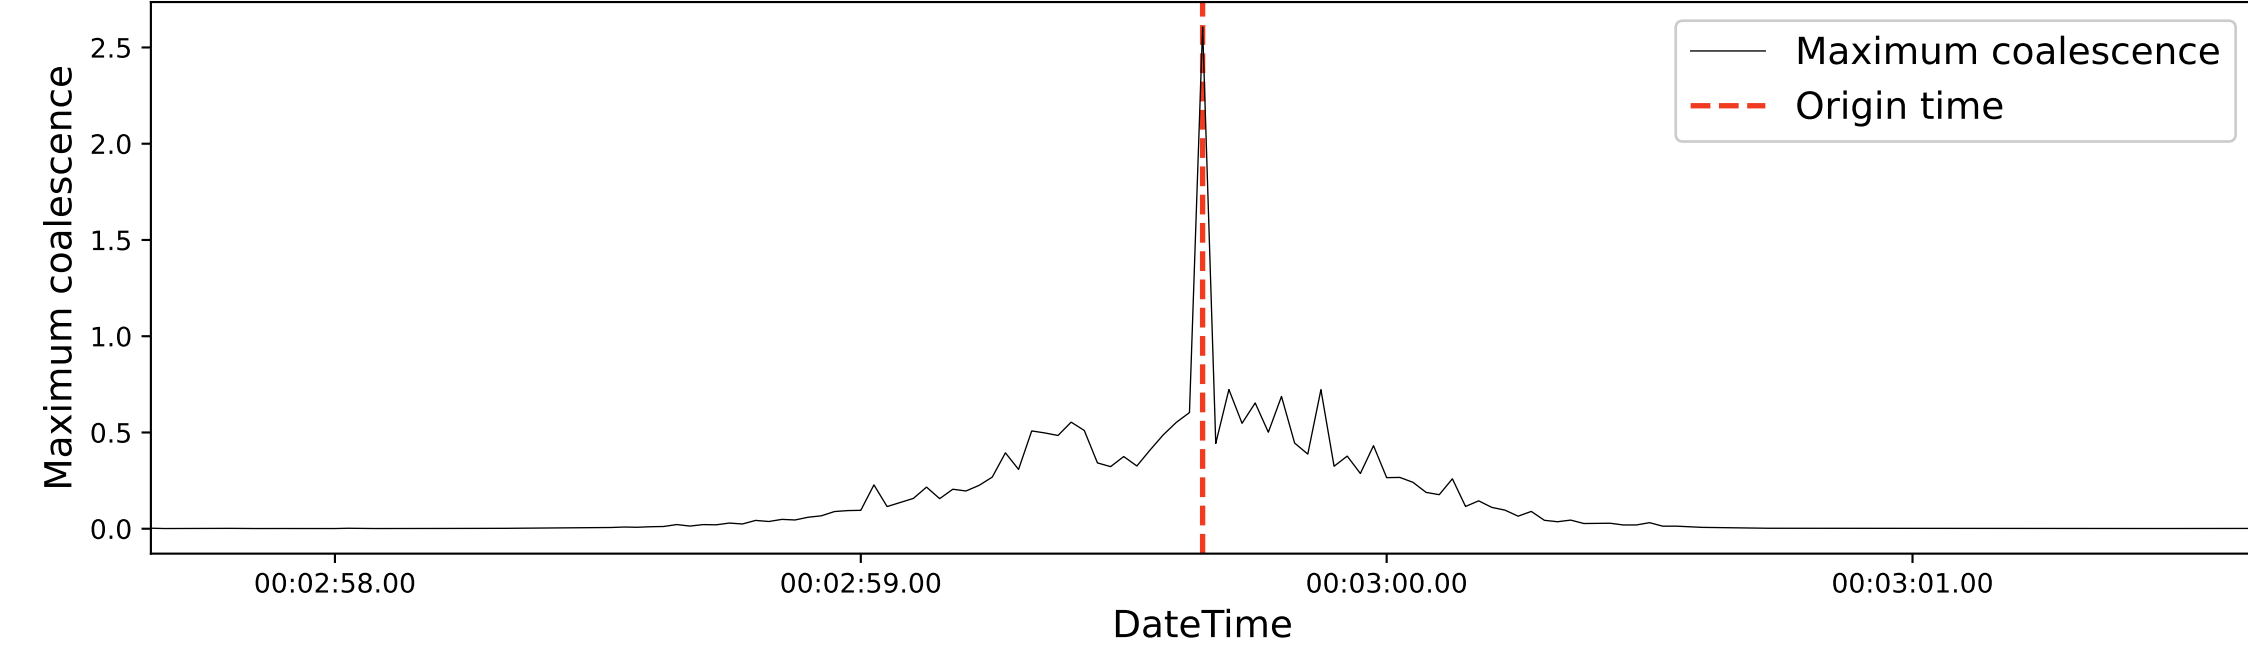

# Korosten point spread function

Origin time: 2022-01-01 00:02:59.650

Hypocentre: 50.9545°N  
28.6535°E

Location error: 0.01 km

Uncertainty ellipse: 81.00 km (semi-major axis)  
29.00 km (semi-minor axis)

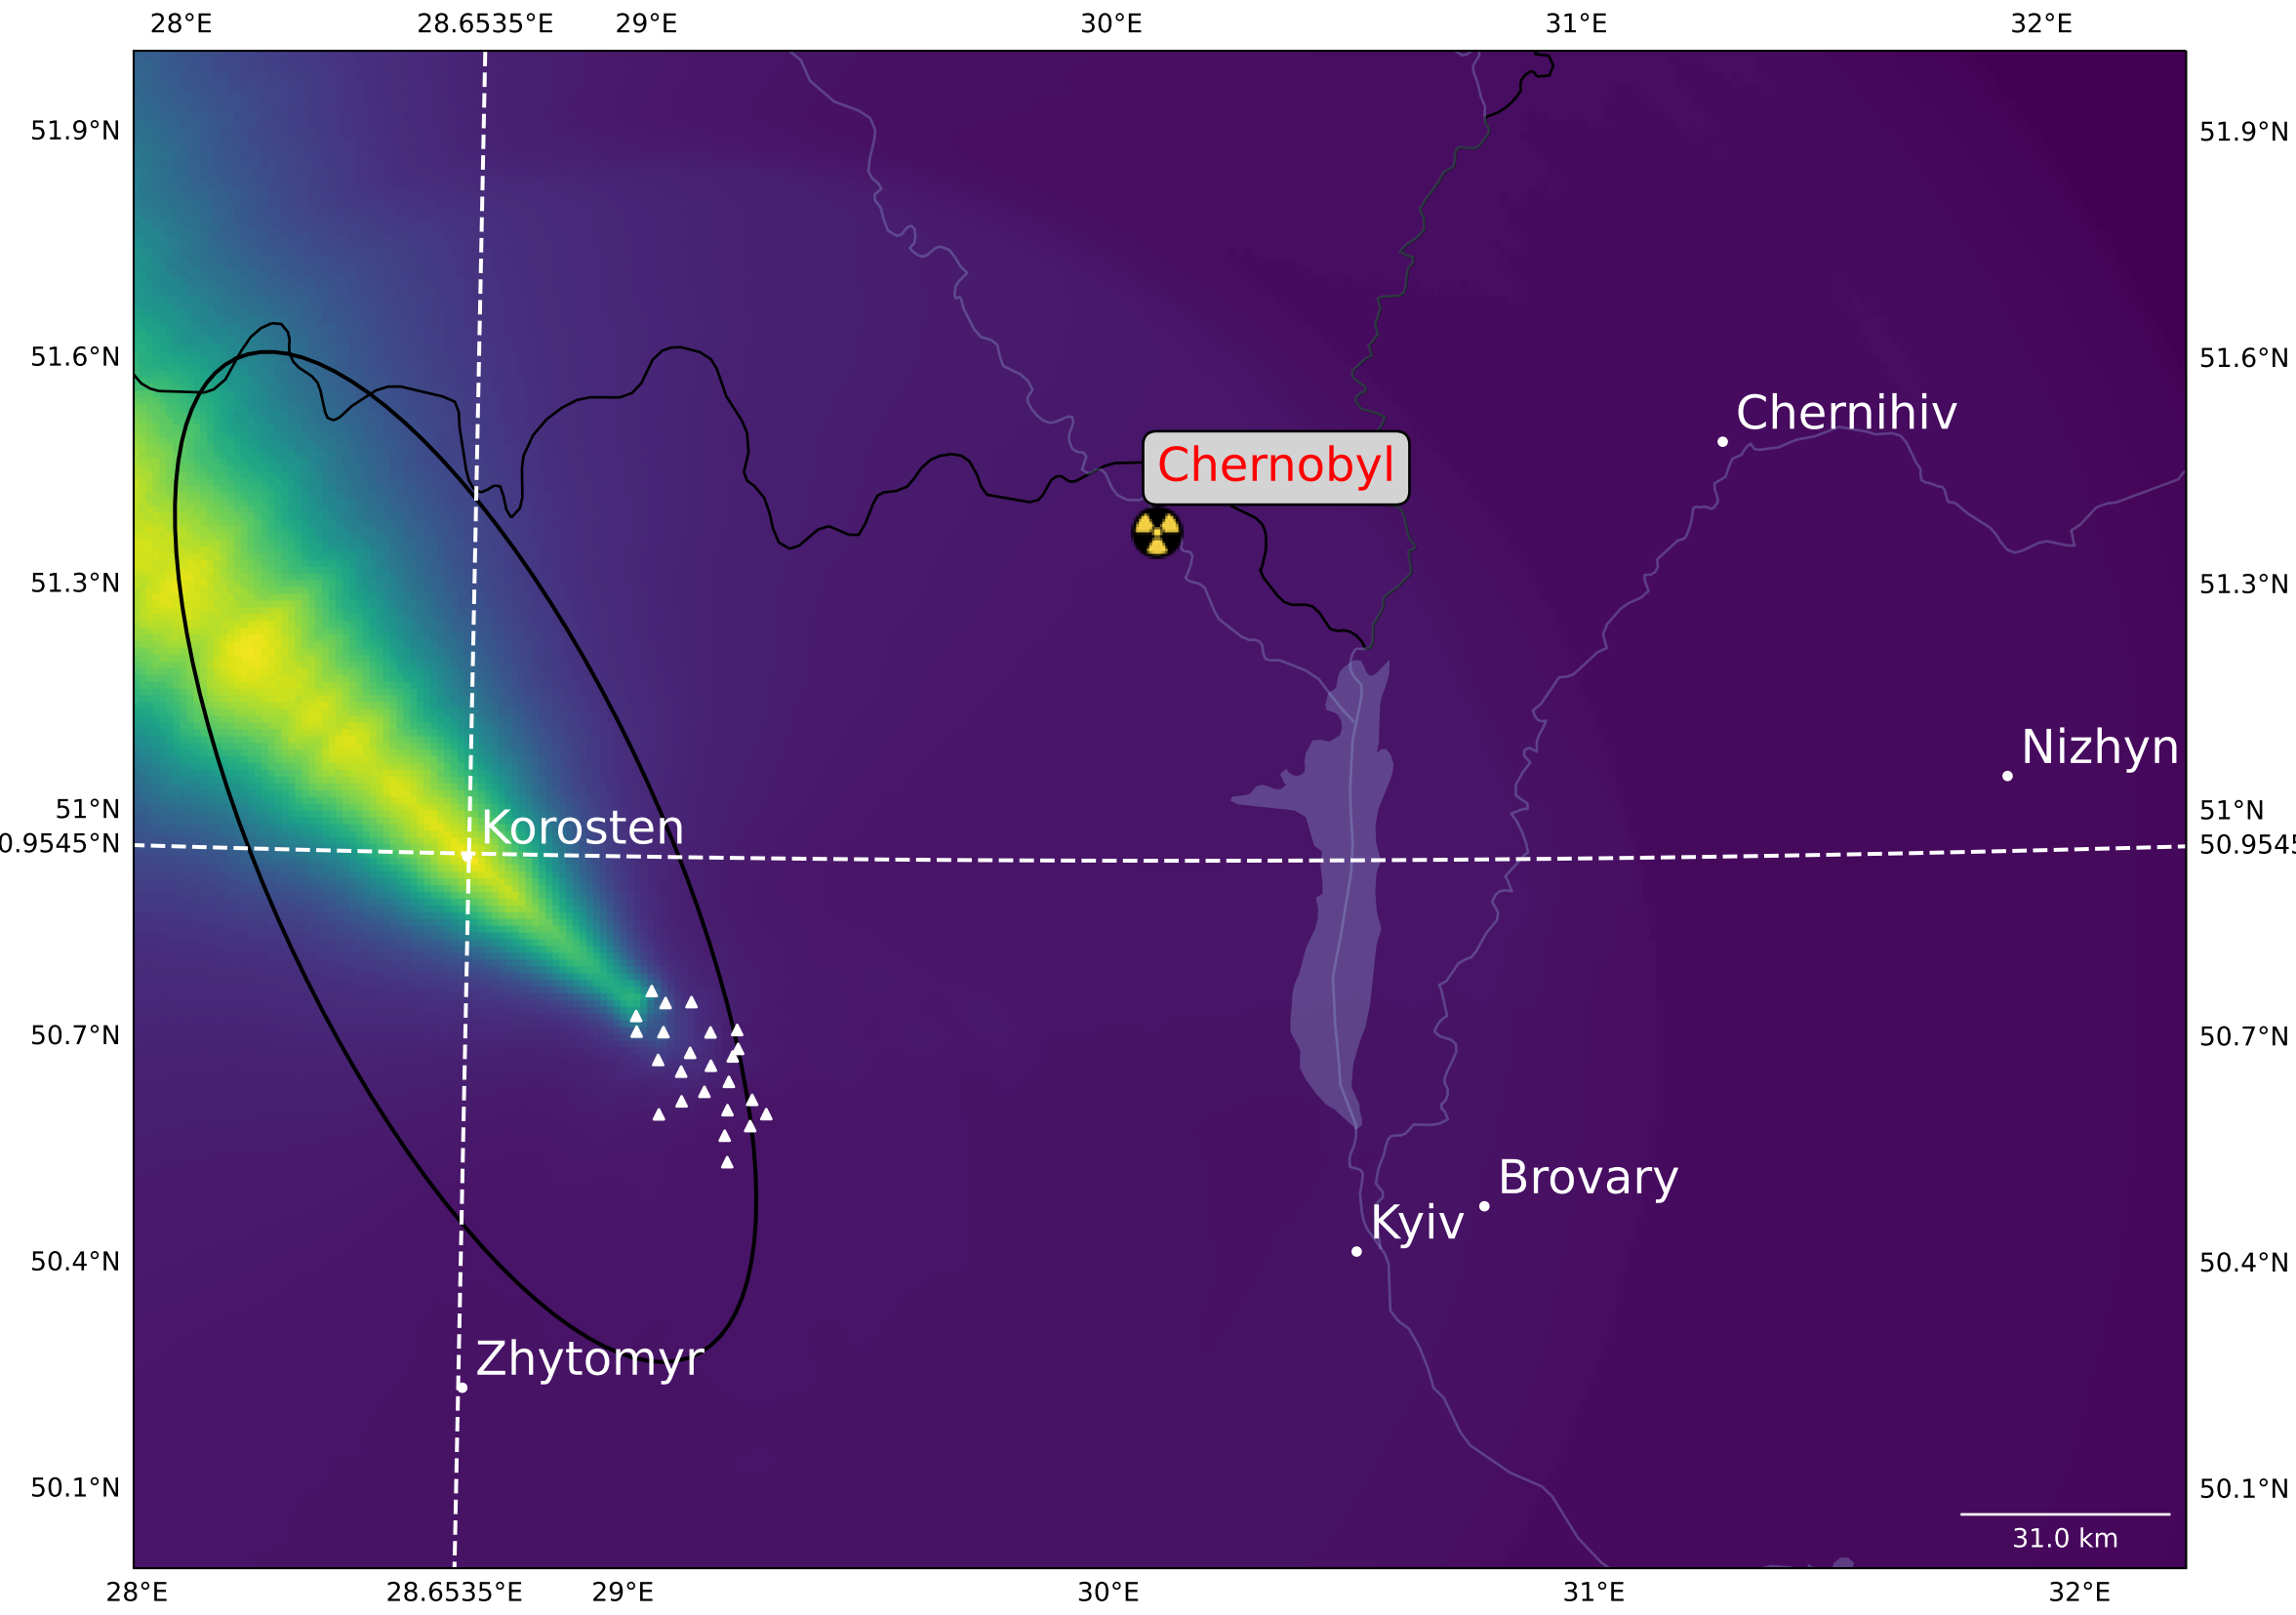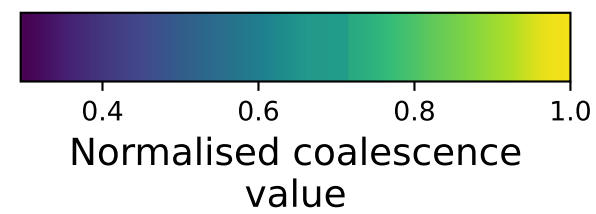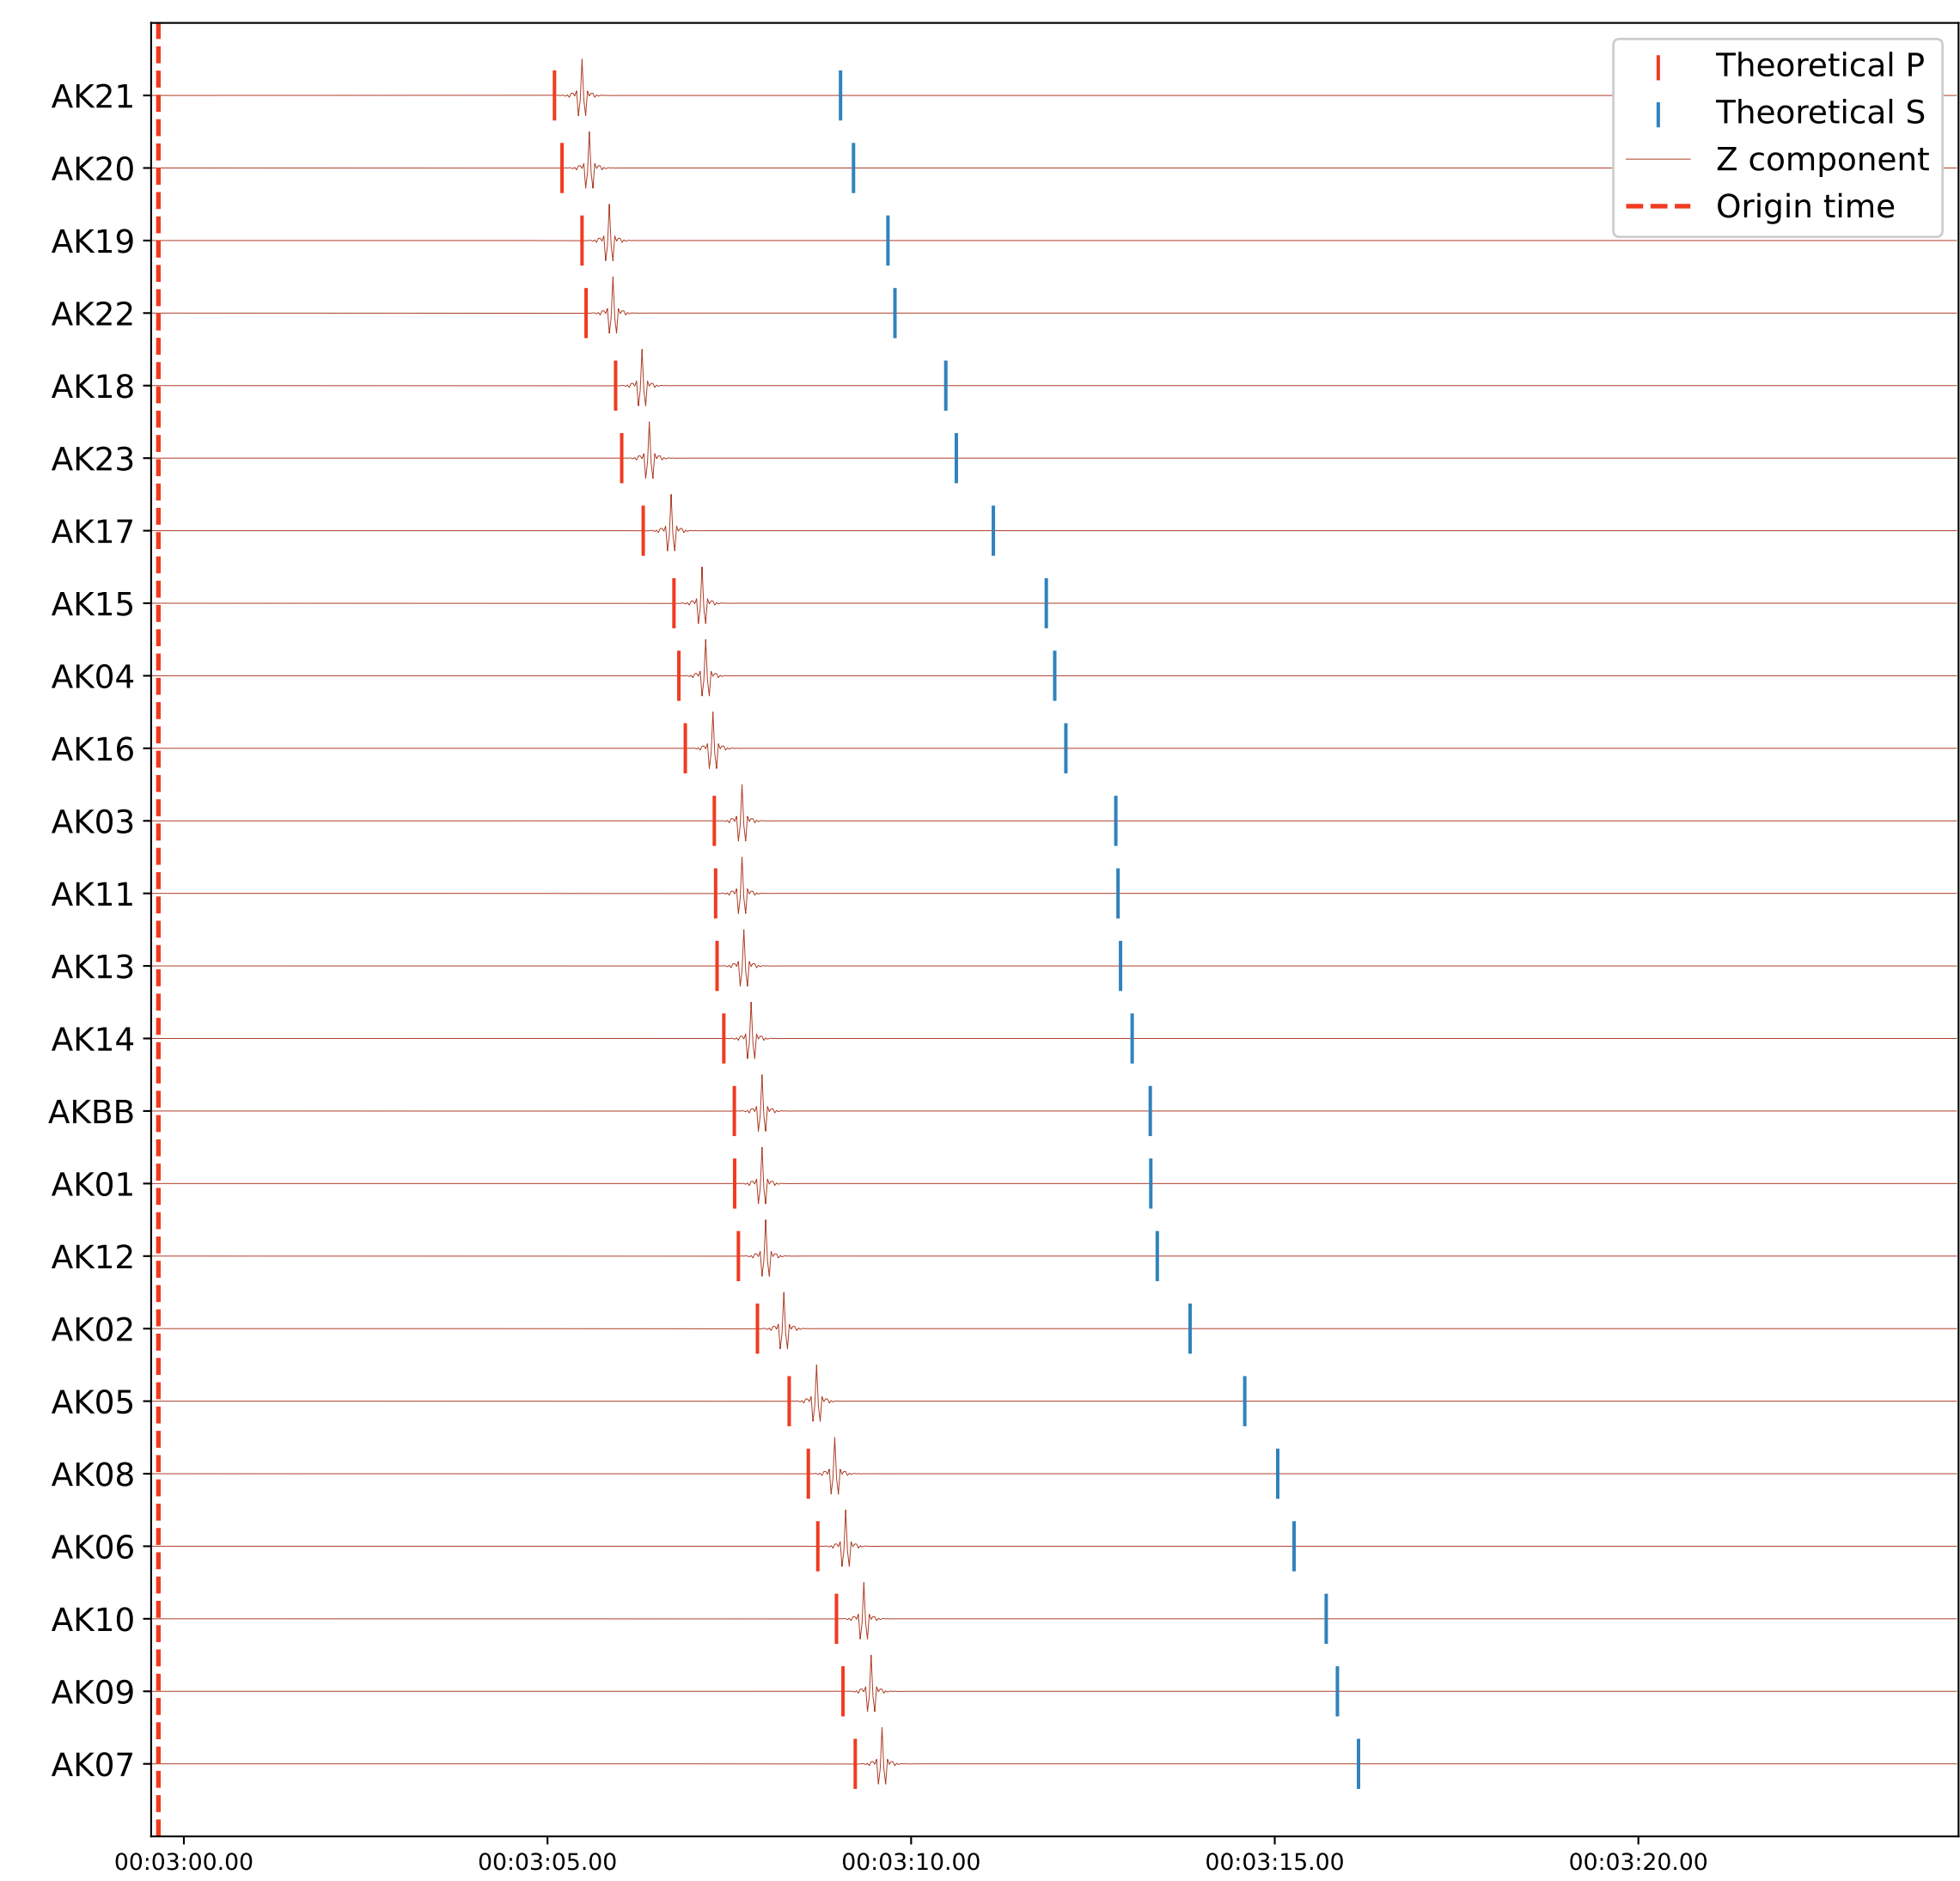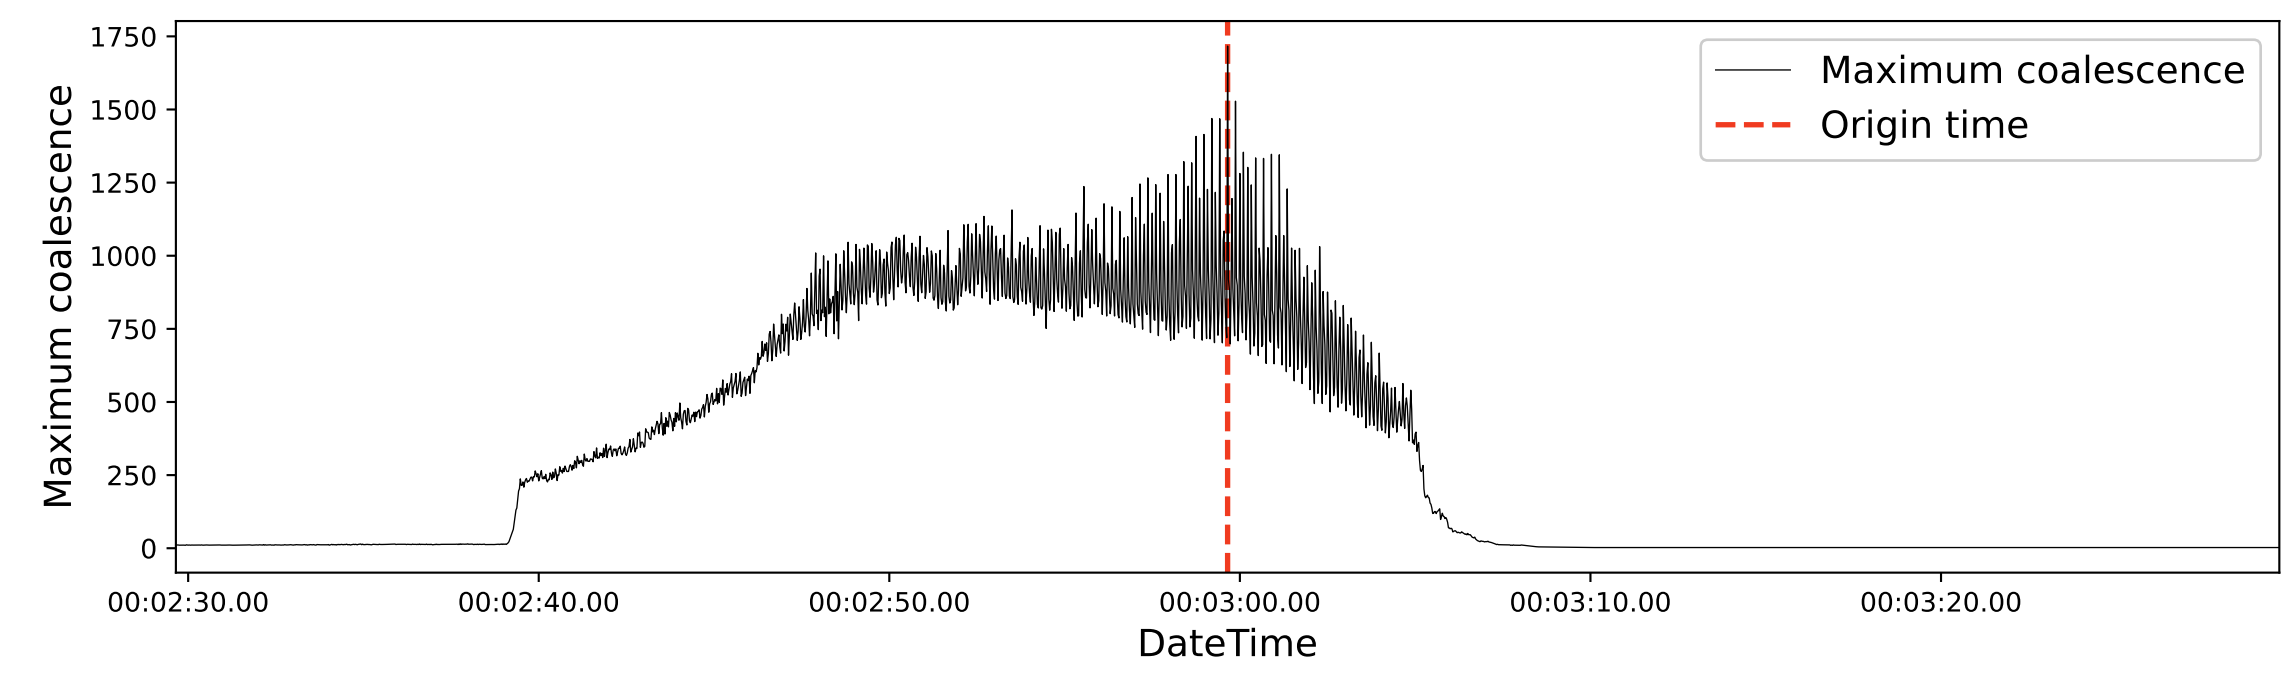

# Korosten point spread function

Origin time: 2022-01-01 00:02:59.650  
 Hypocentre: 50.9545°N  
 28.6535°E  
 Location error: 0.01 km  
 Uncertainty ellipse: 66.00 km (semi-major axis)  
 19.00 km (semi-minor axis)

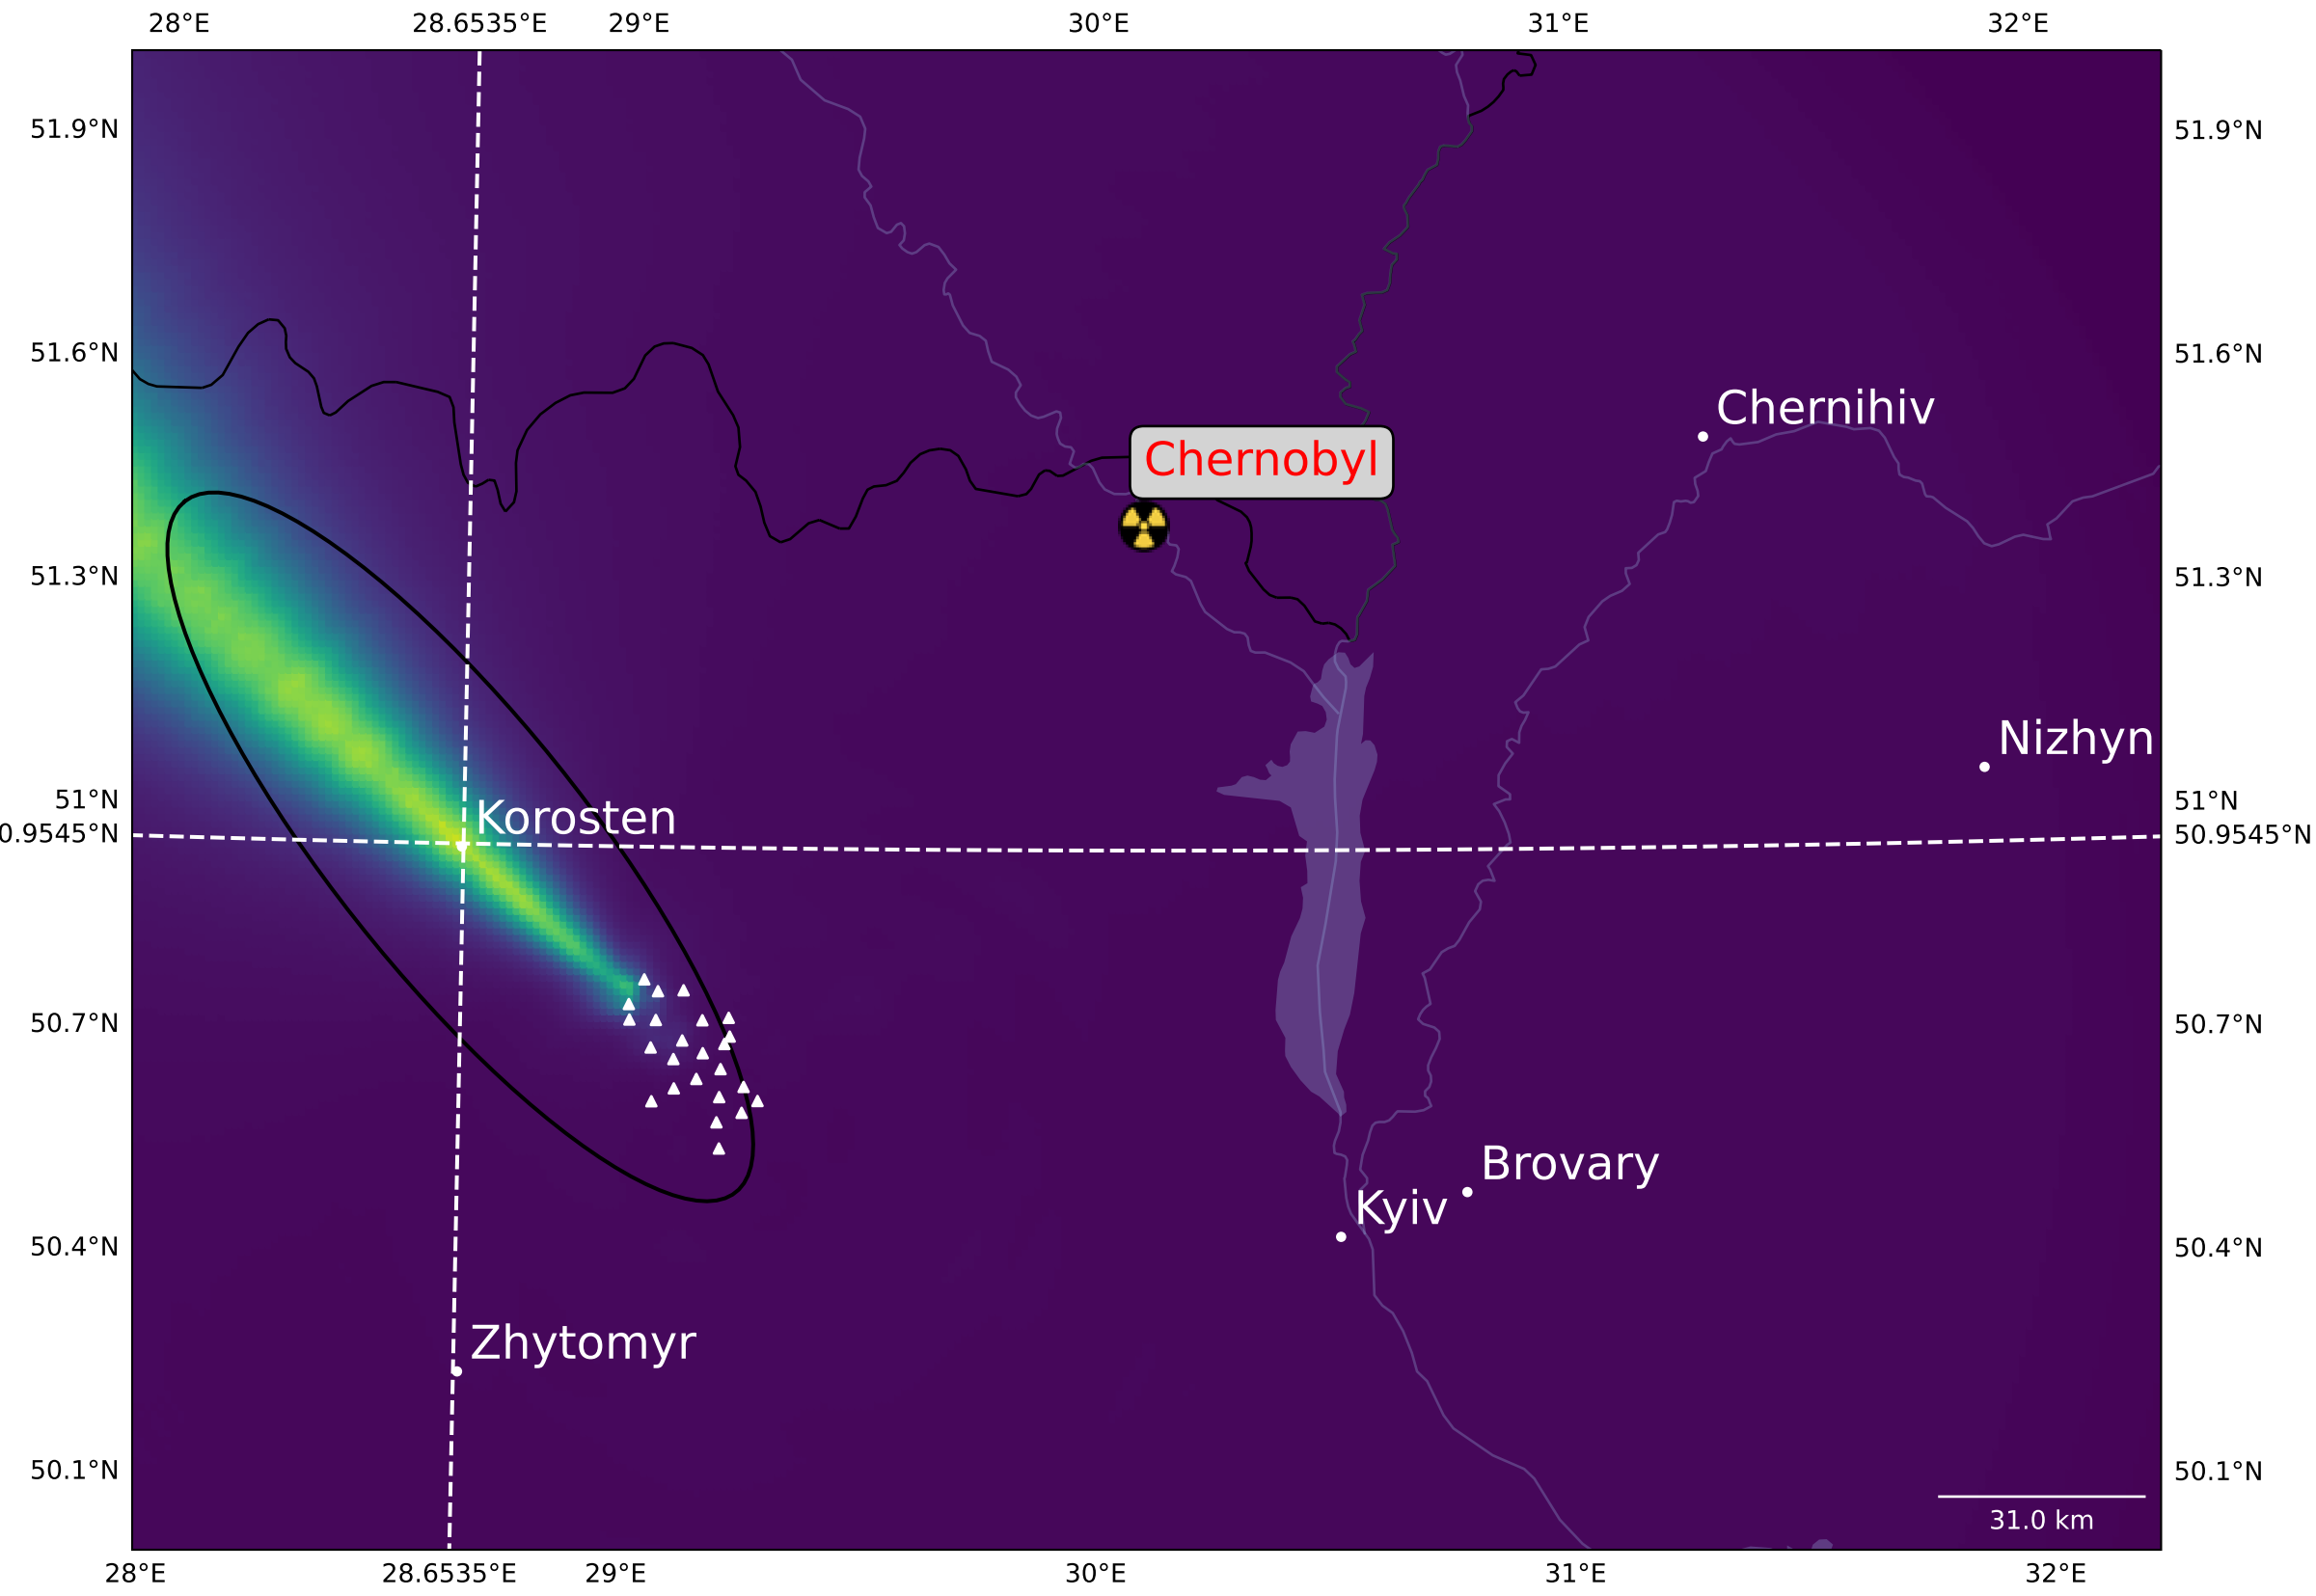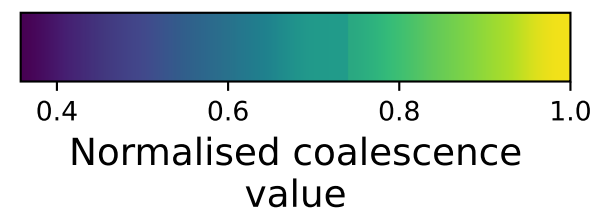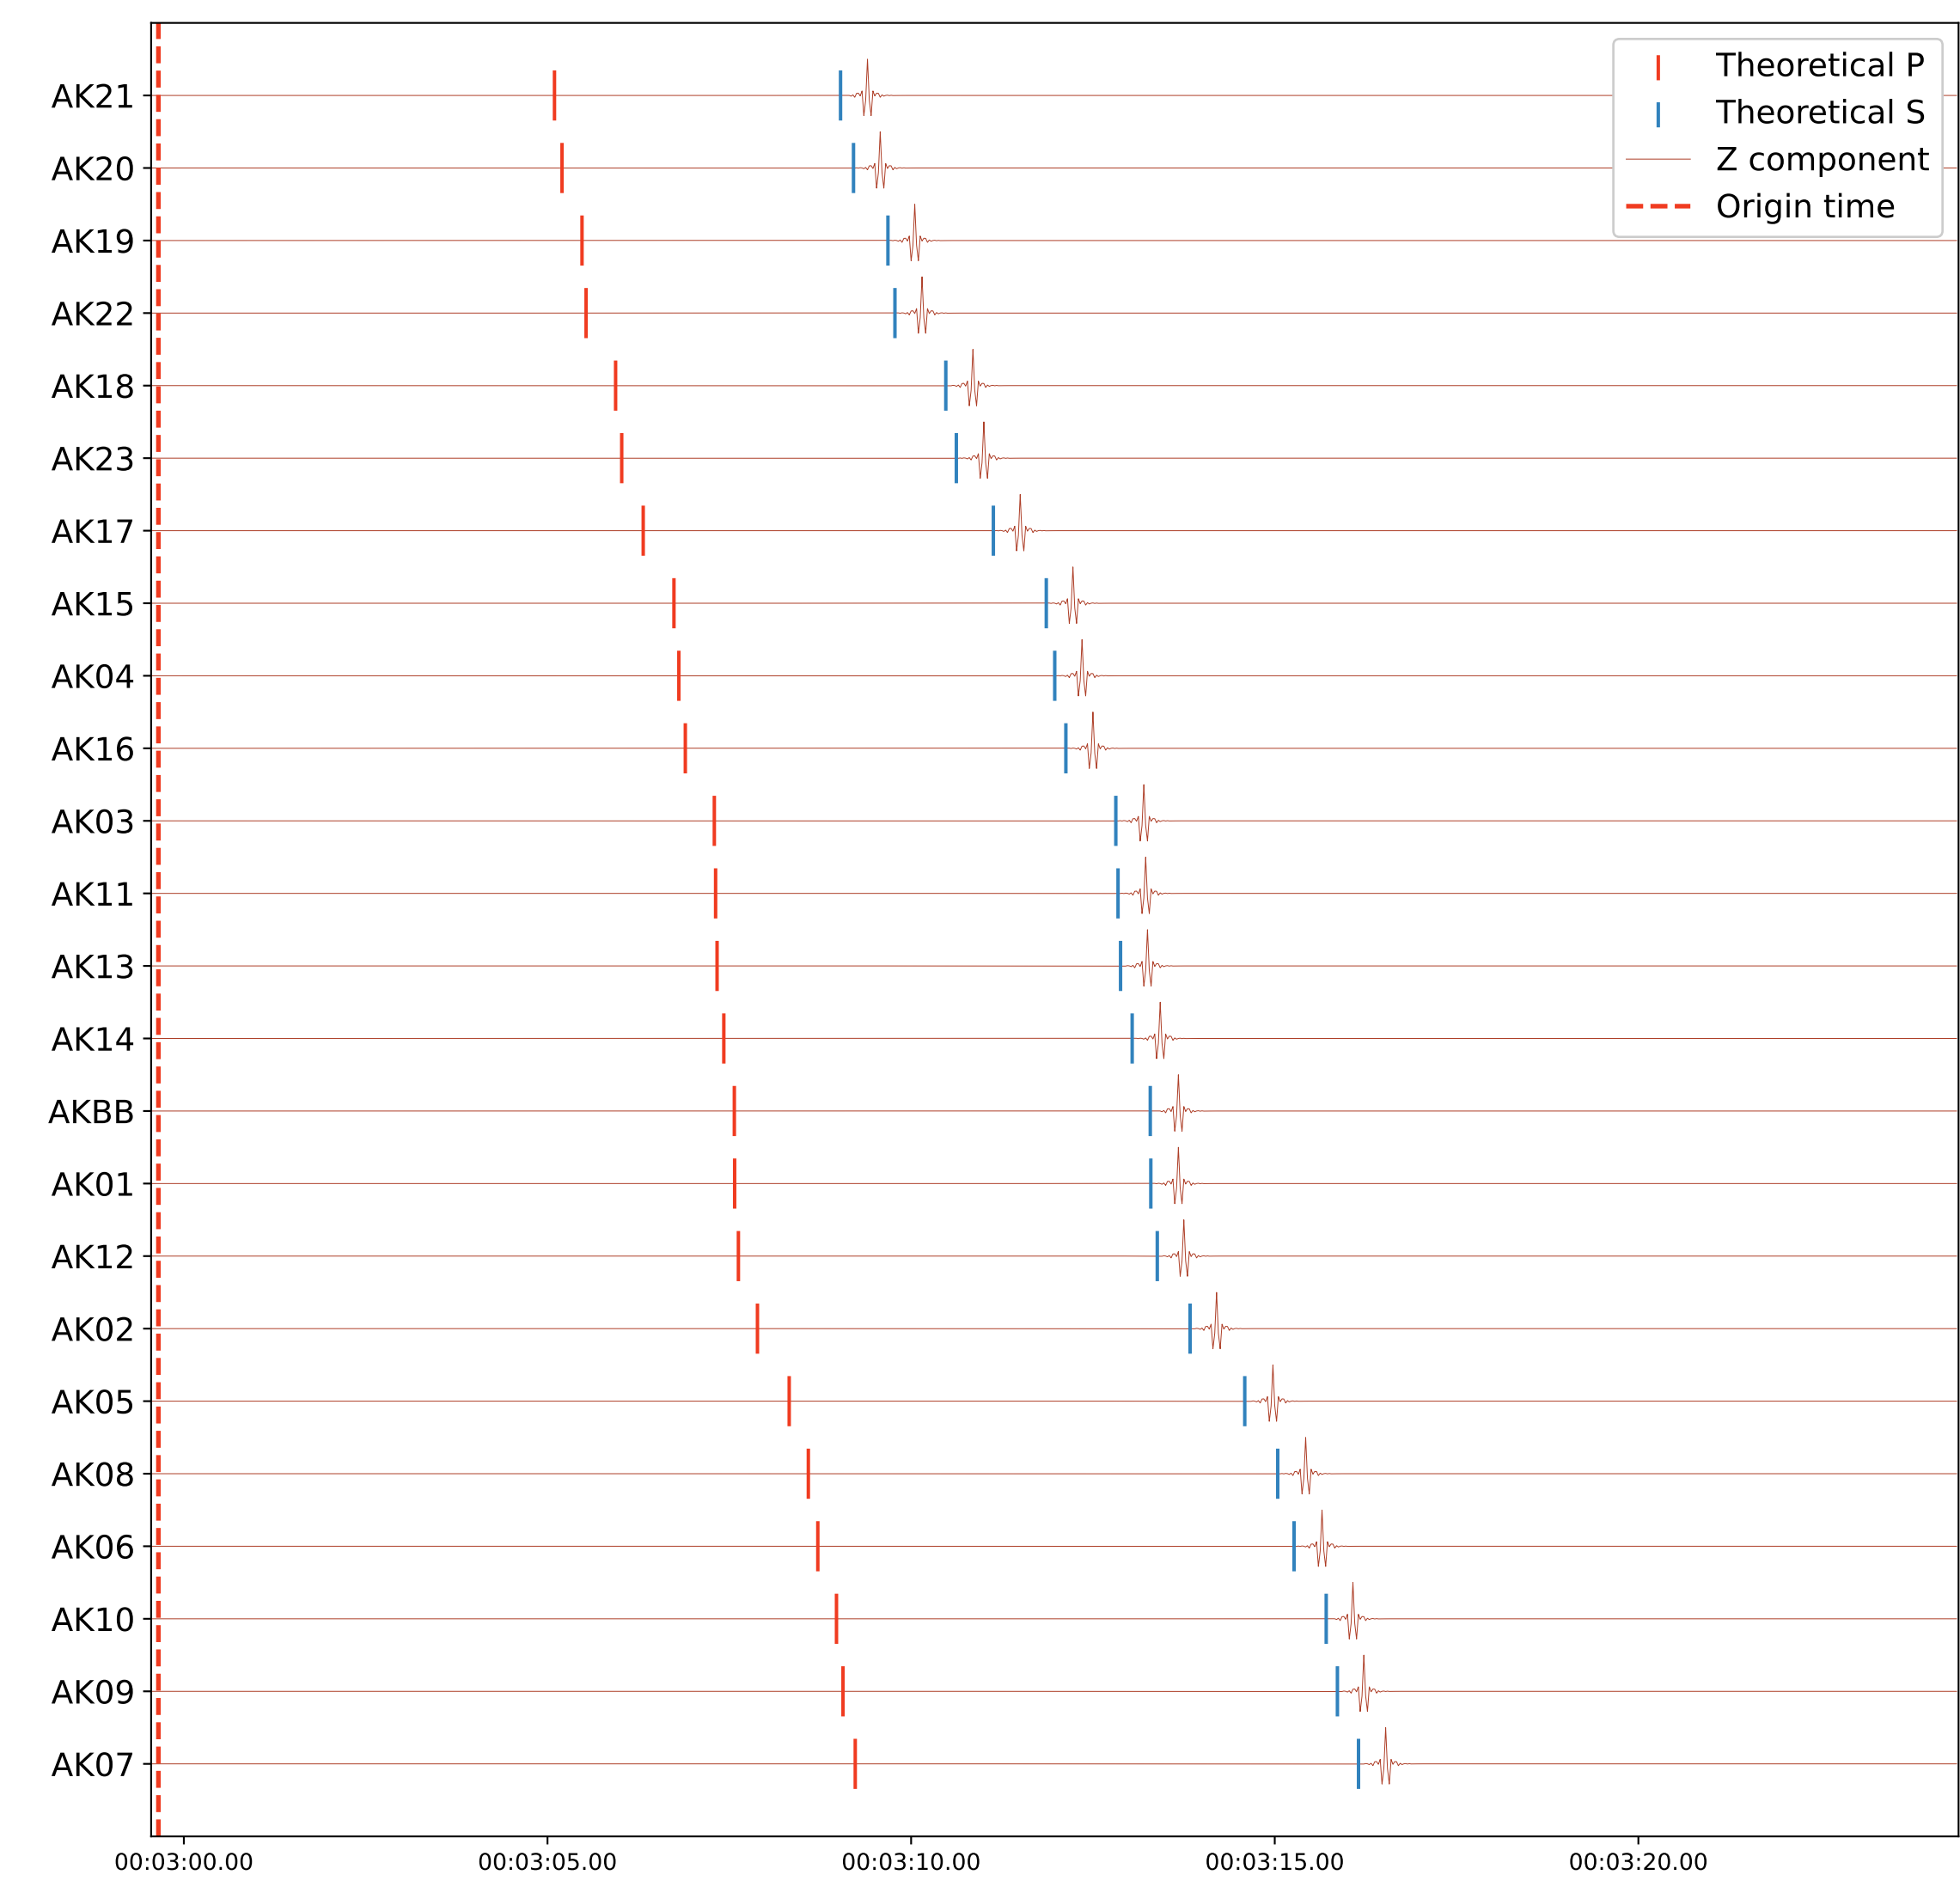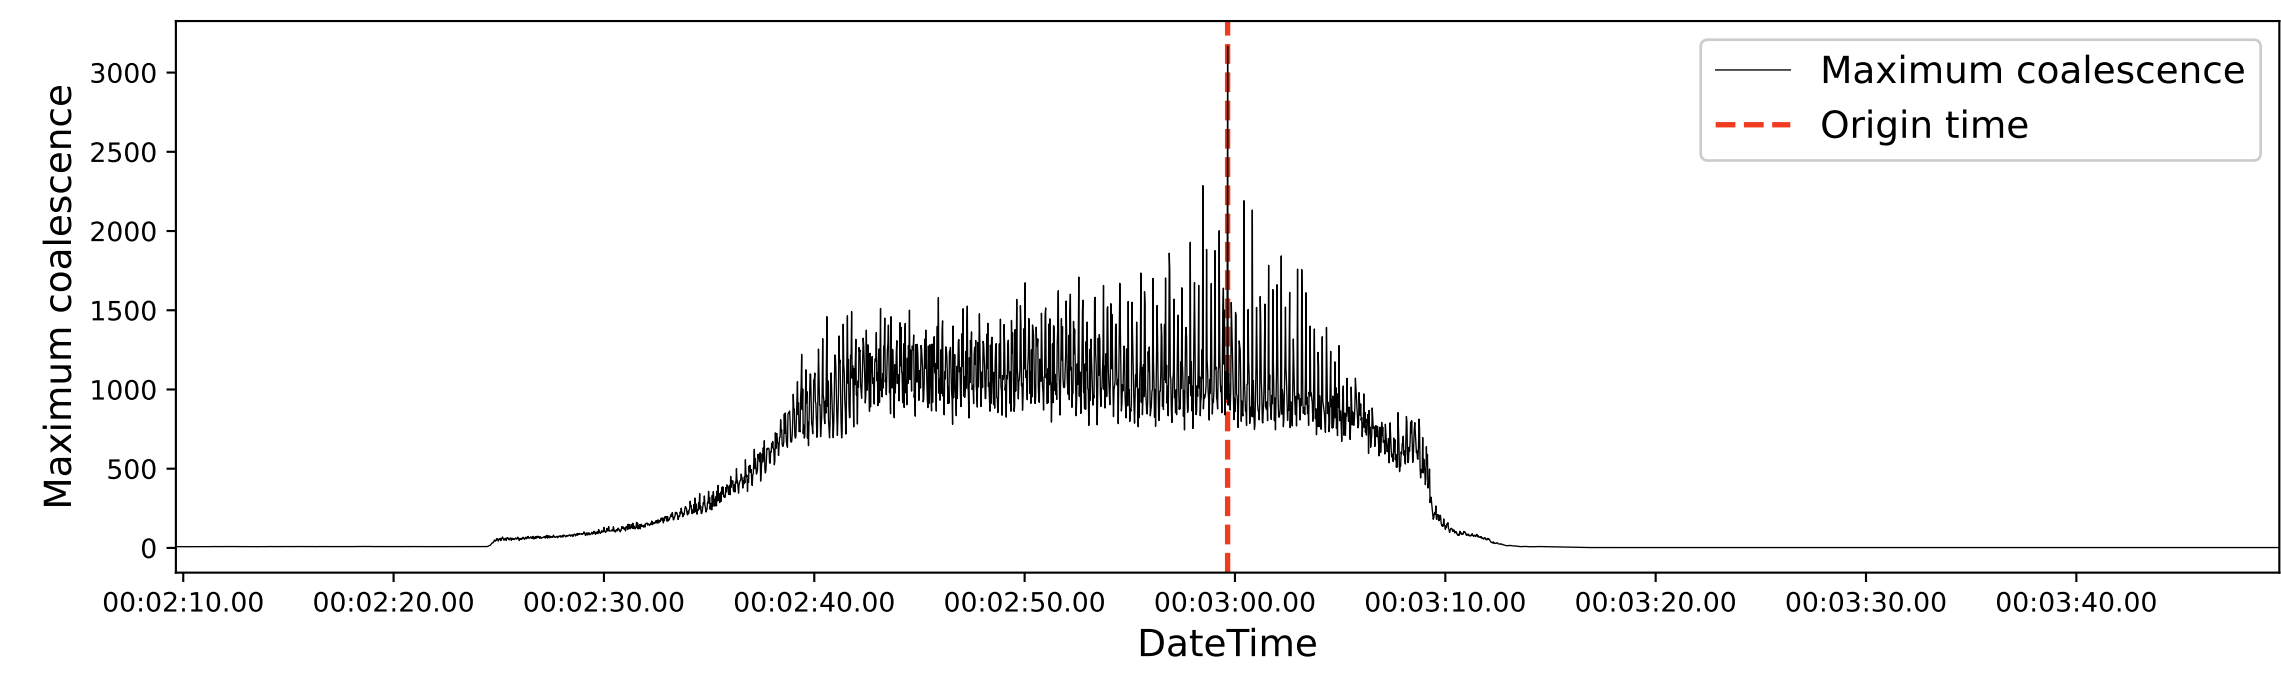

# Korosten point spread function

Origin time: 2022-01-01 00:02:59.650  
 Hypocentre: 50.9545°N  
 28.6535°E  
 Location error: 0.01 km  
 Uncertainty ellipse: 1.80 km (semi-major axis)  
 0.82 km (semi-minor axis)

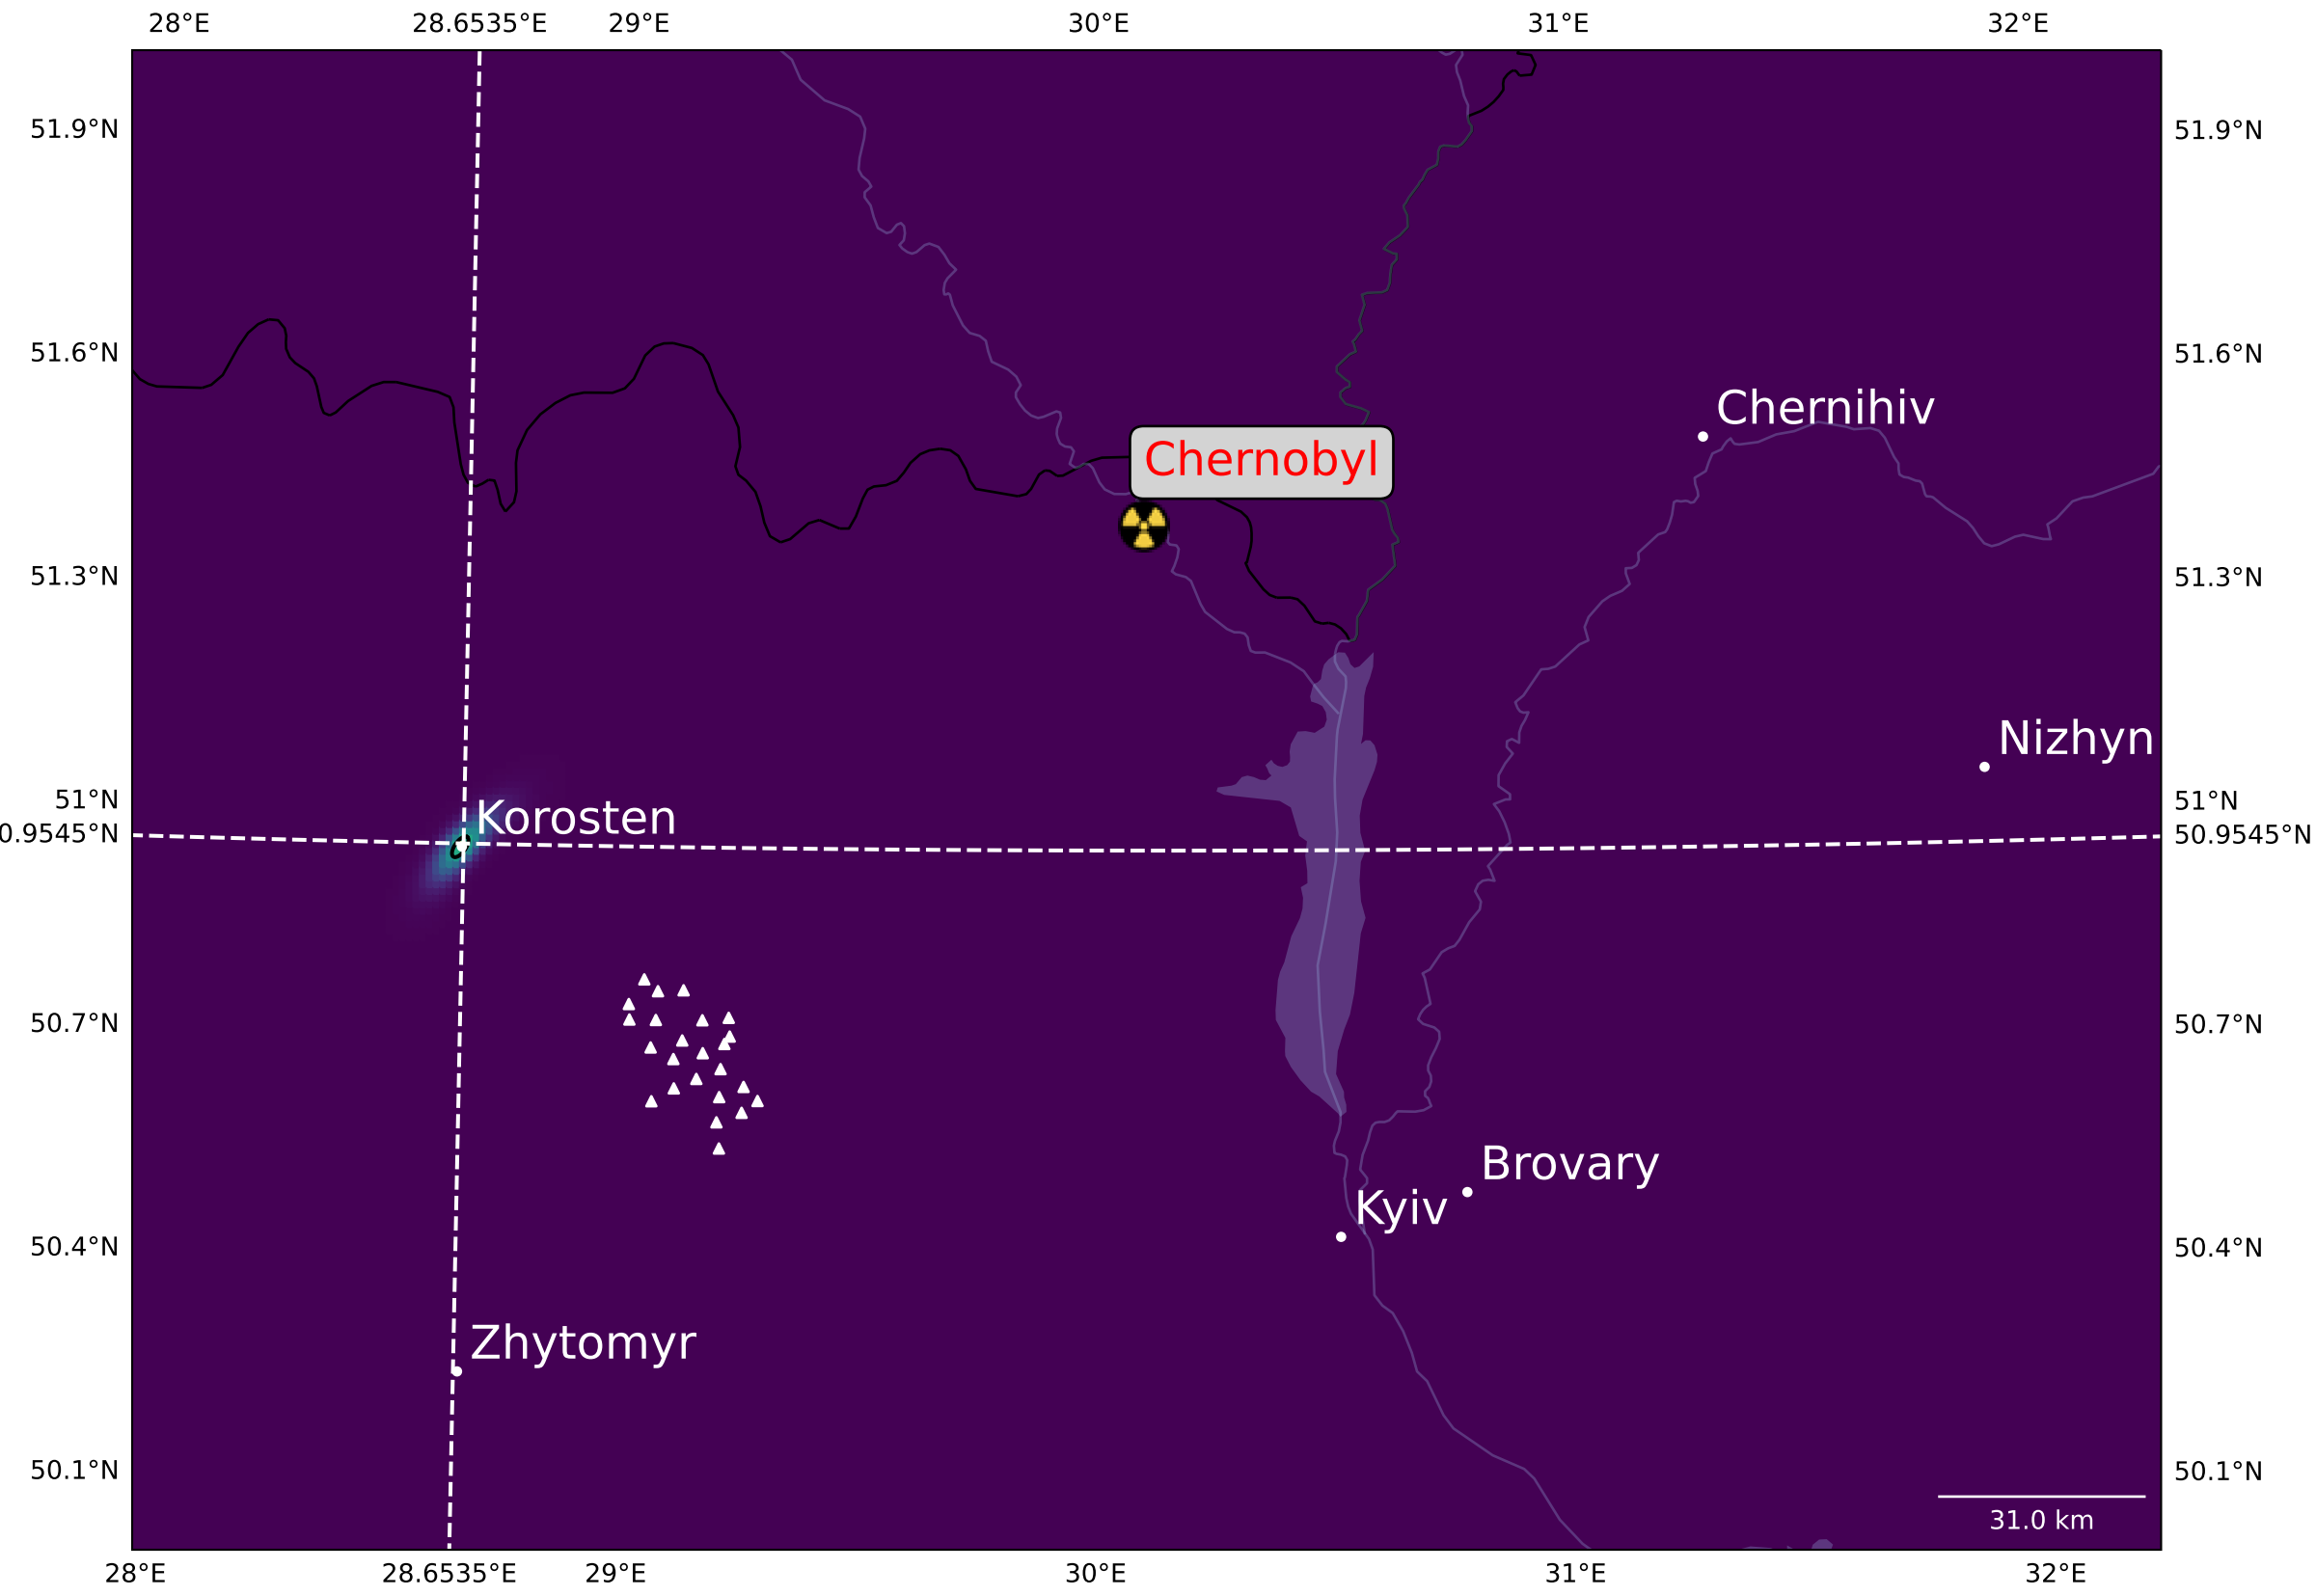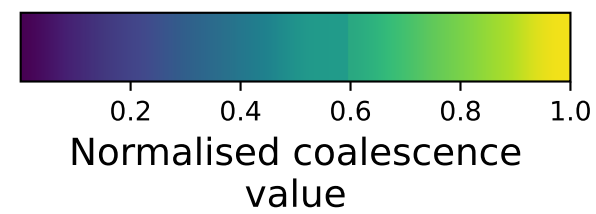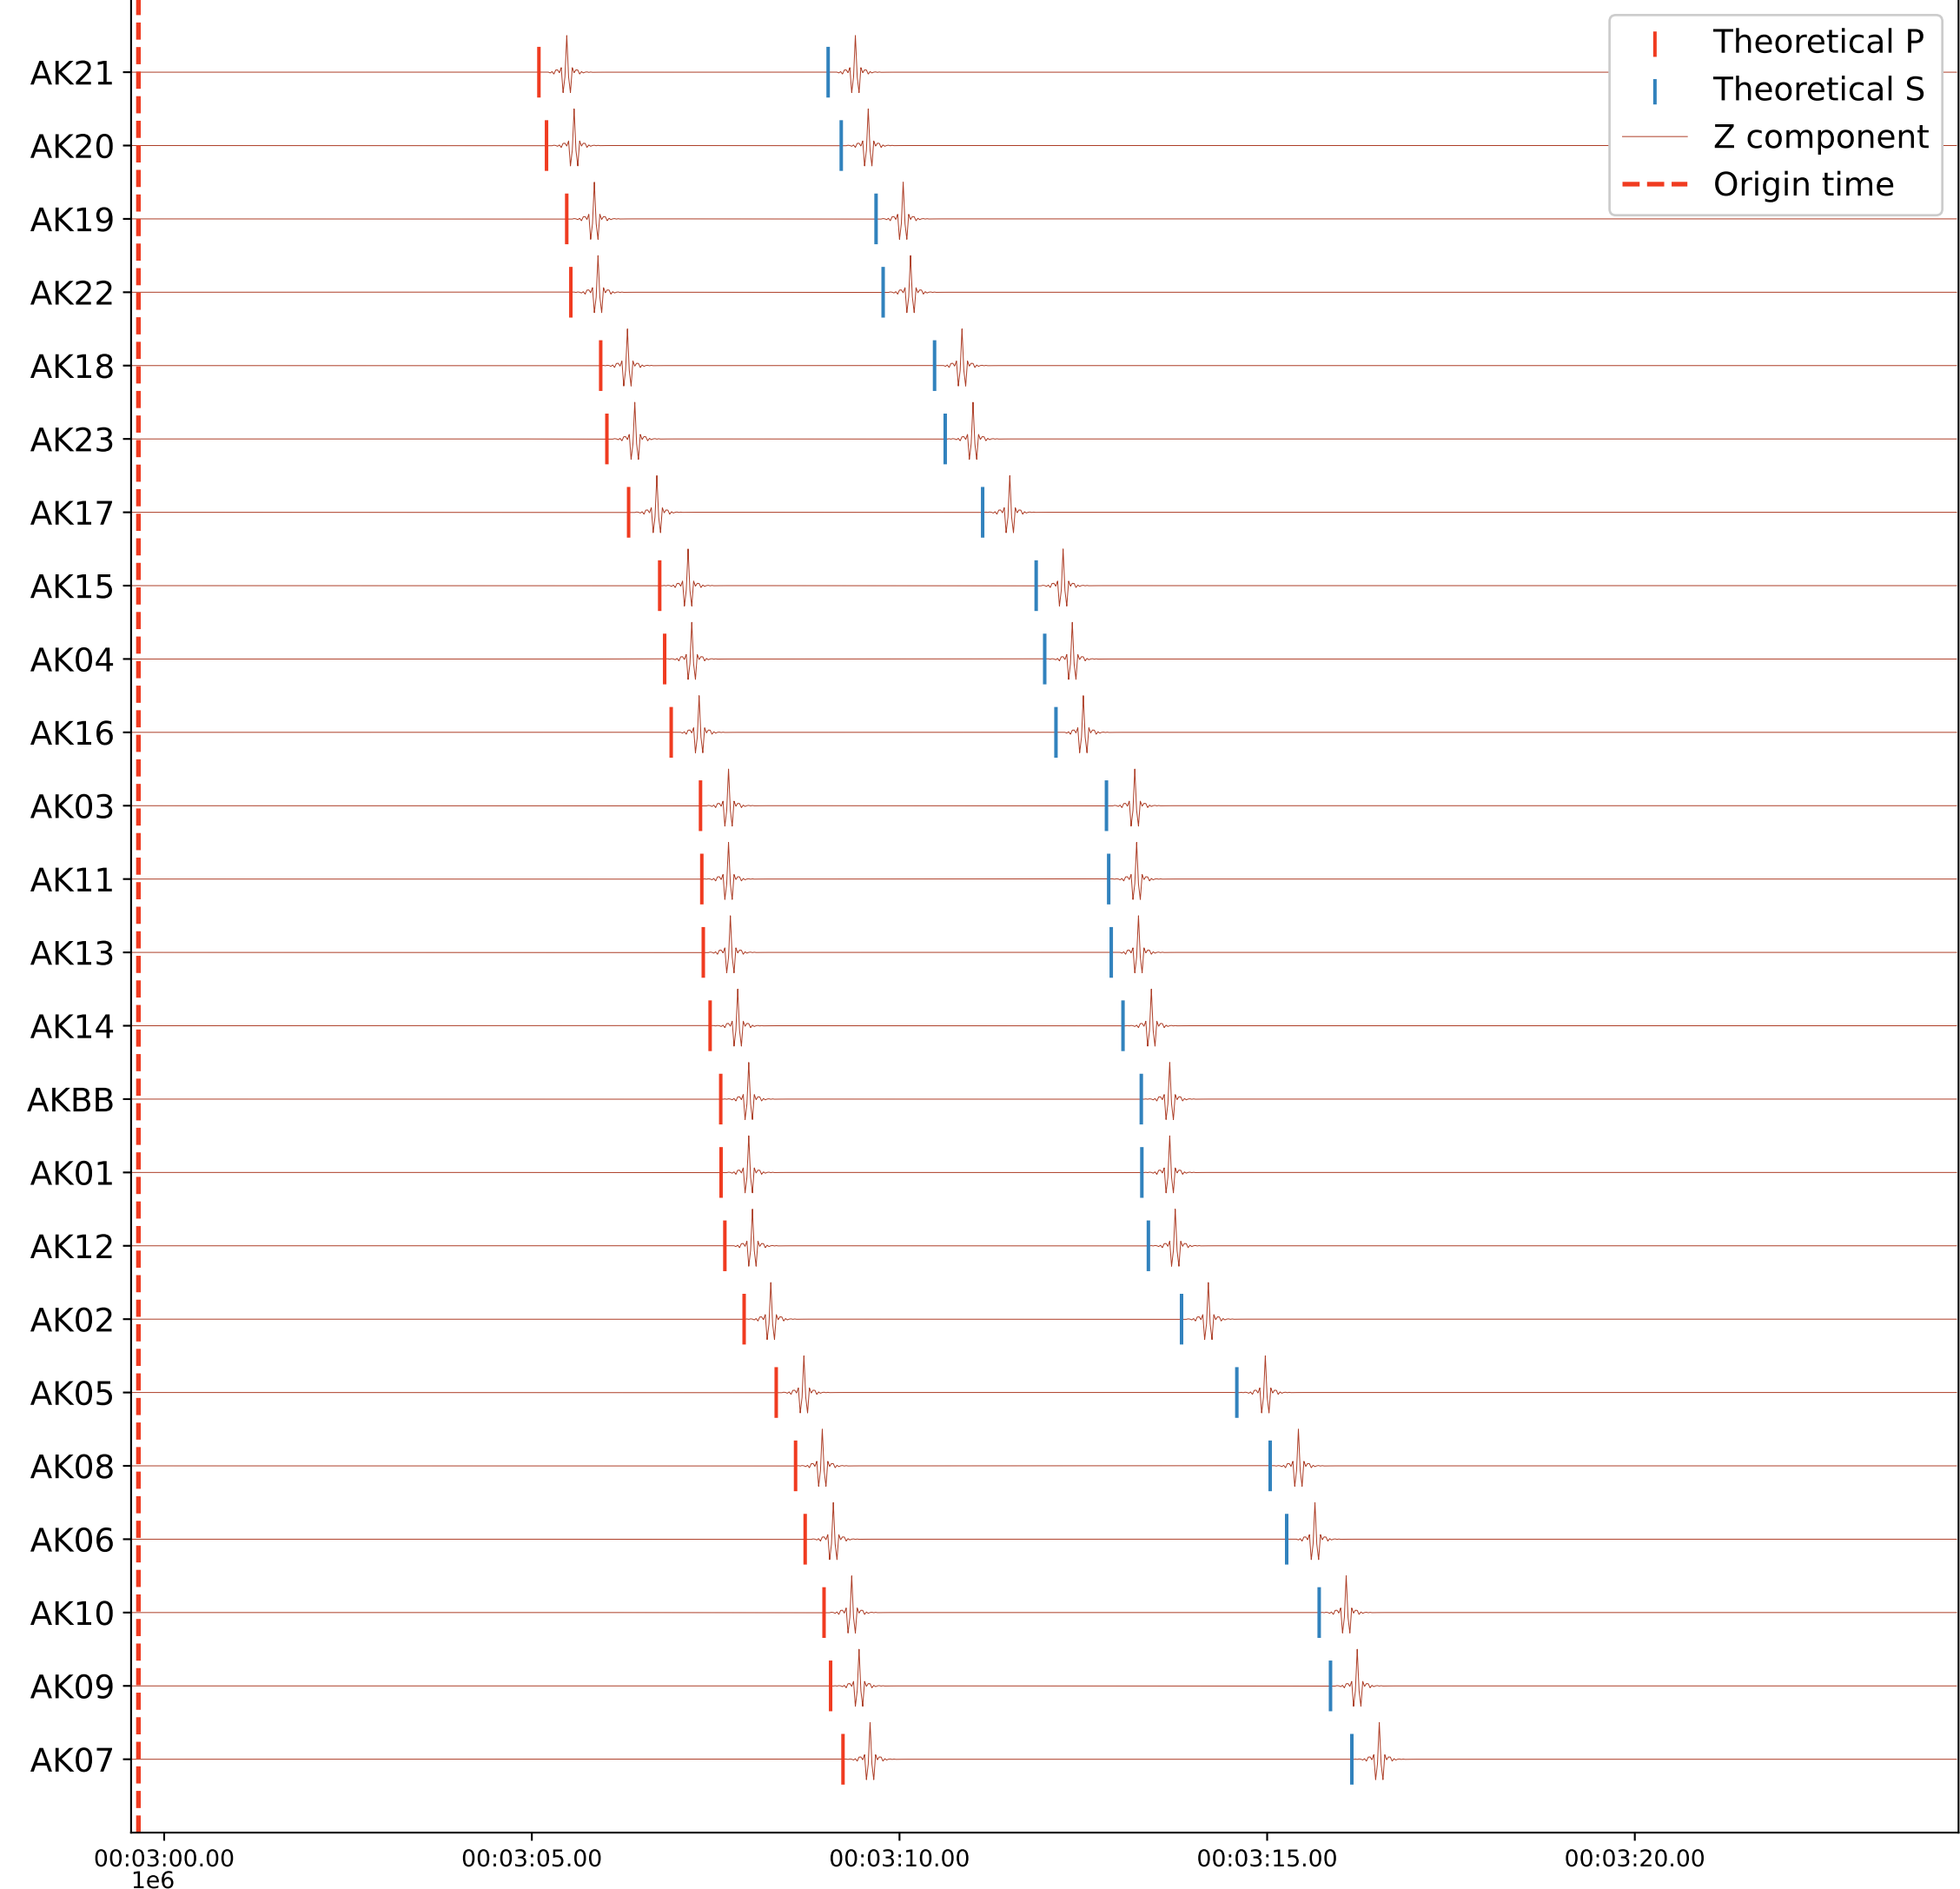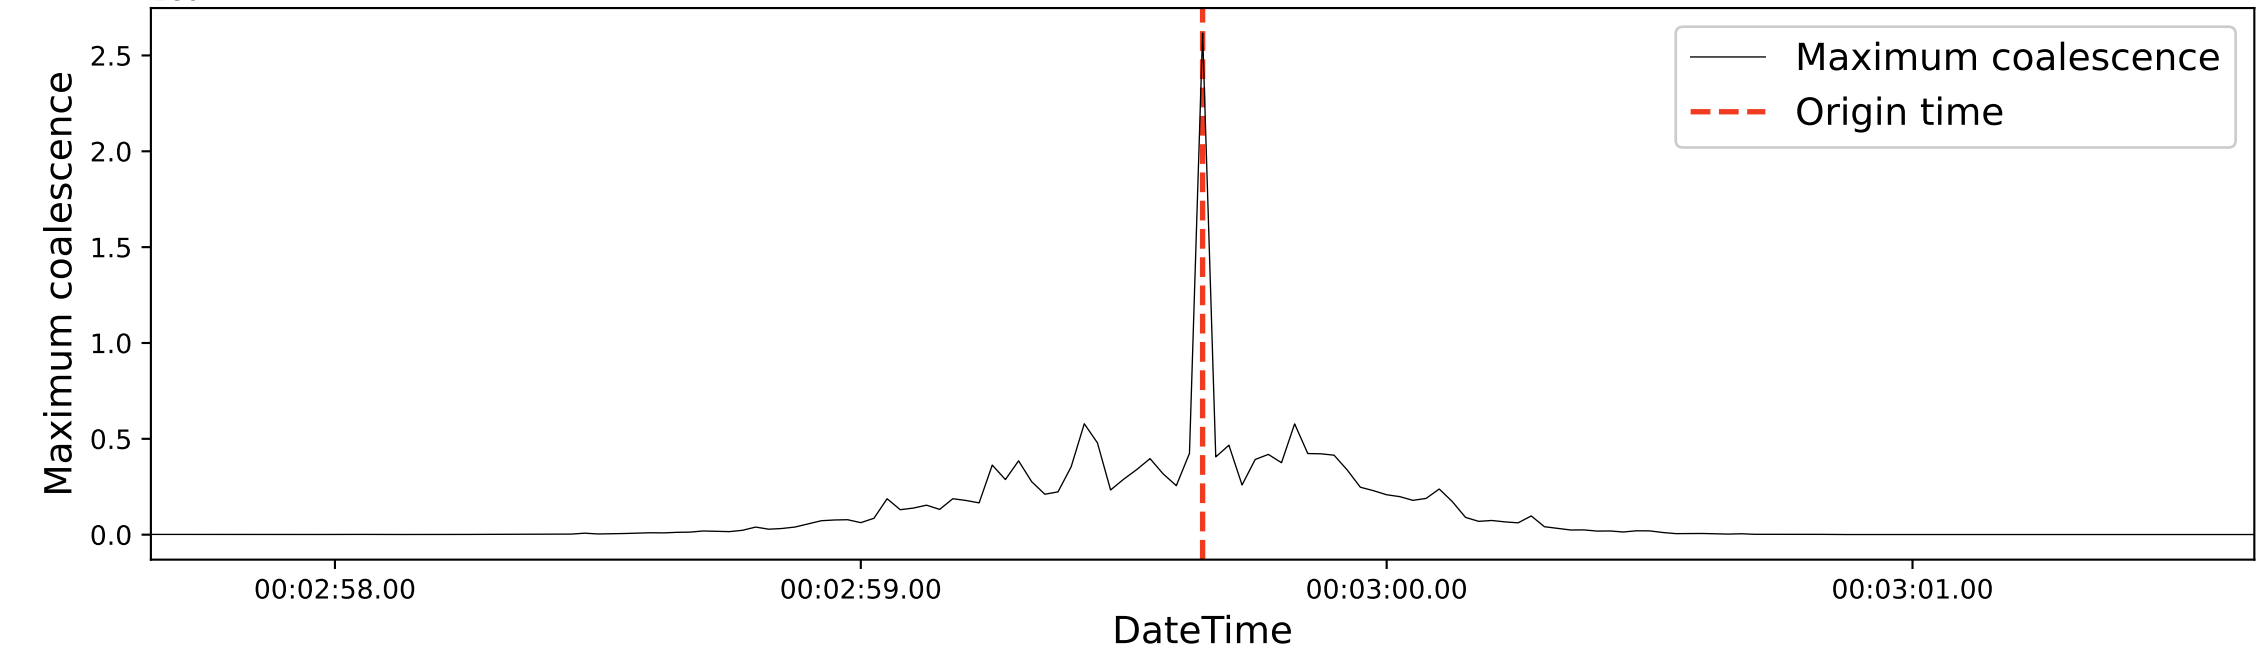

# Kyiv point spread function

Origin time: 2022-01-01 00:02:59.650

Hypocentre: 50.4332°N  
30.514°E

Location error: 0.00 km

Uncertainty ellipse: 110.00 km (semi-major axis)  
37.00 km (semi-minor axis)

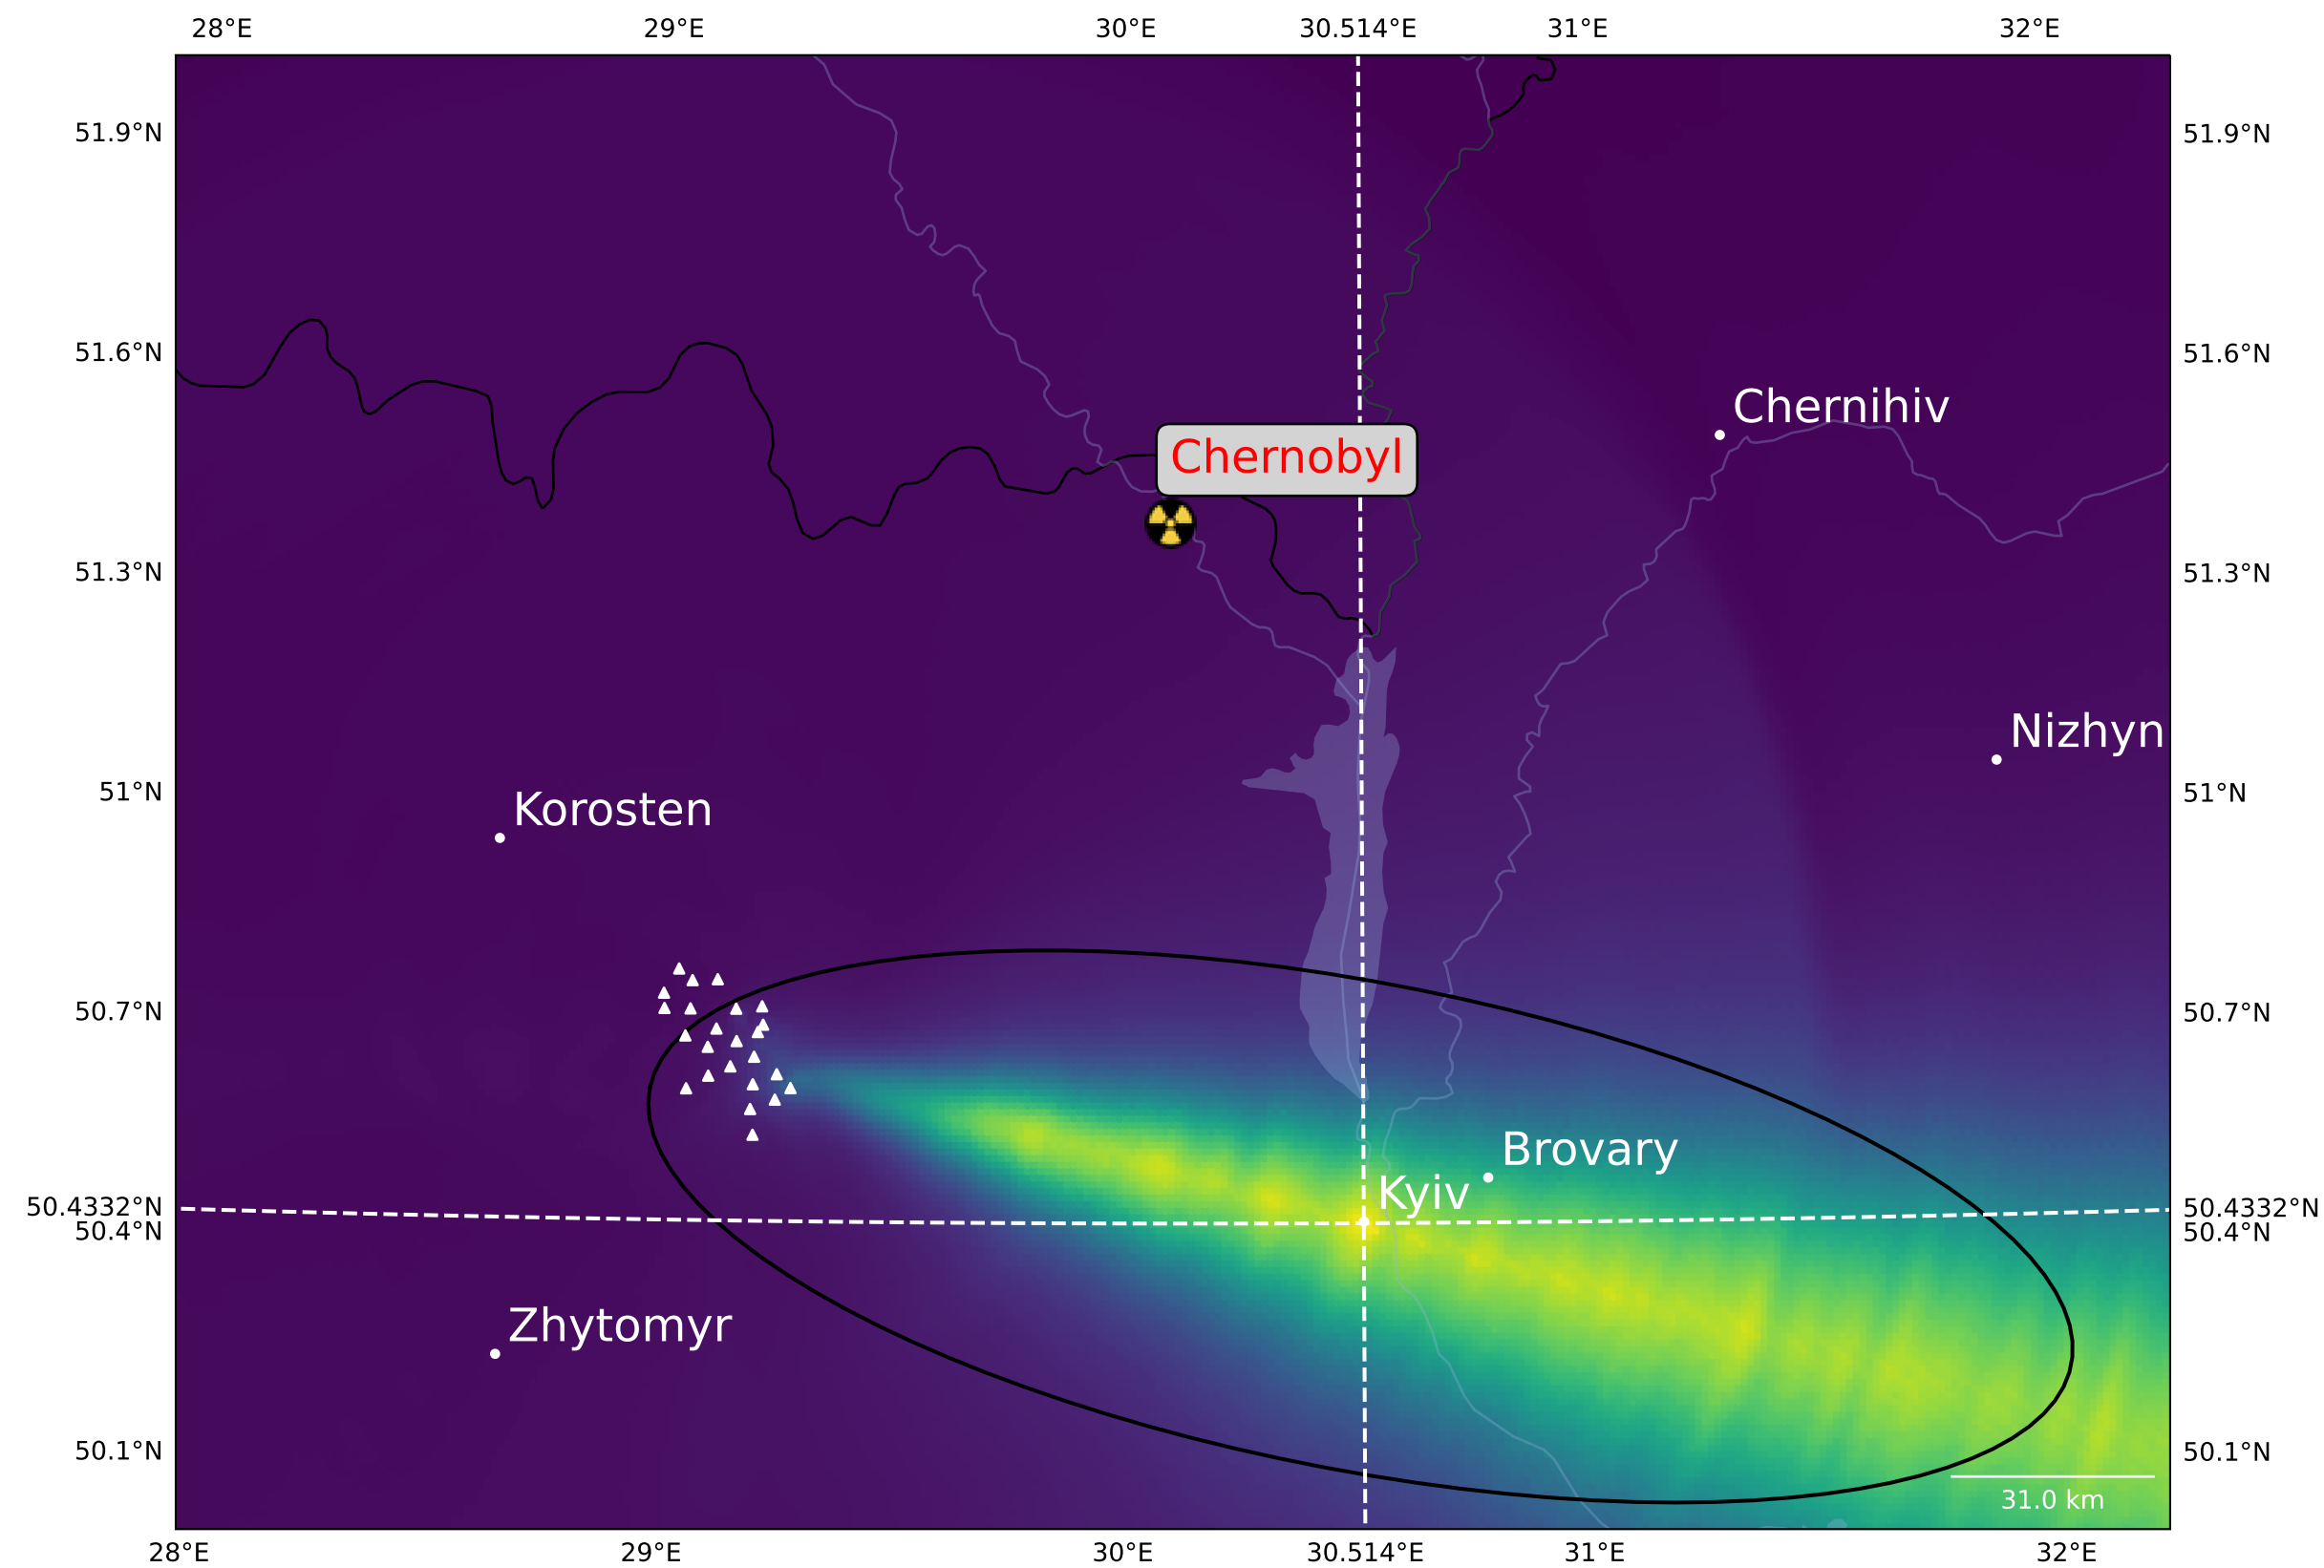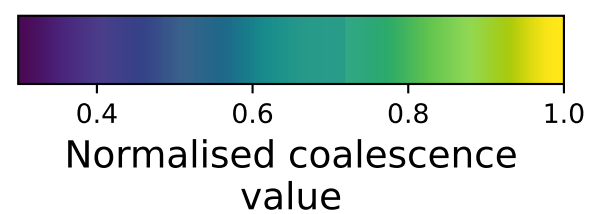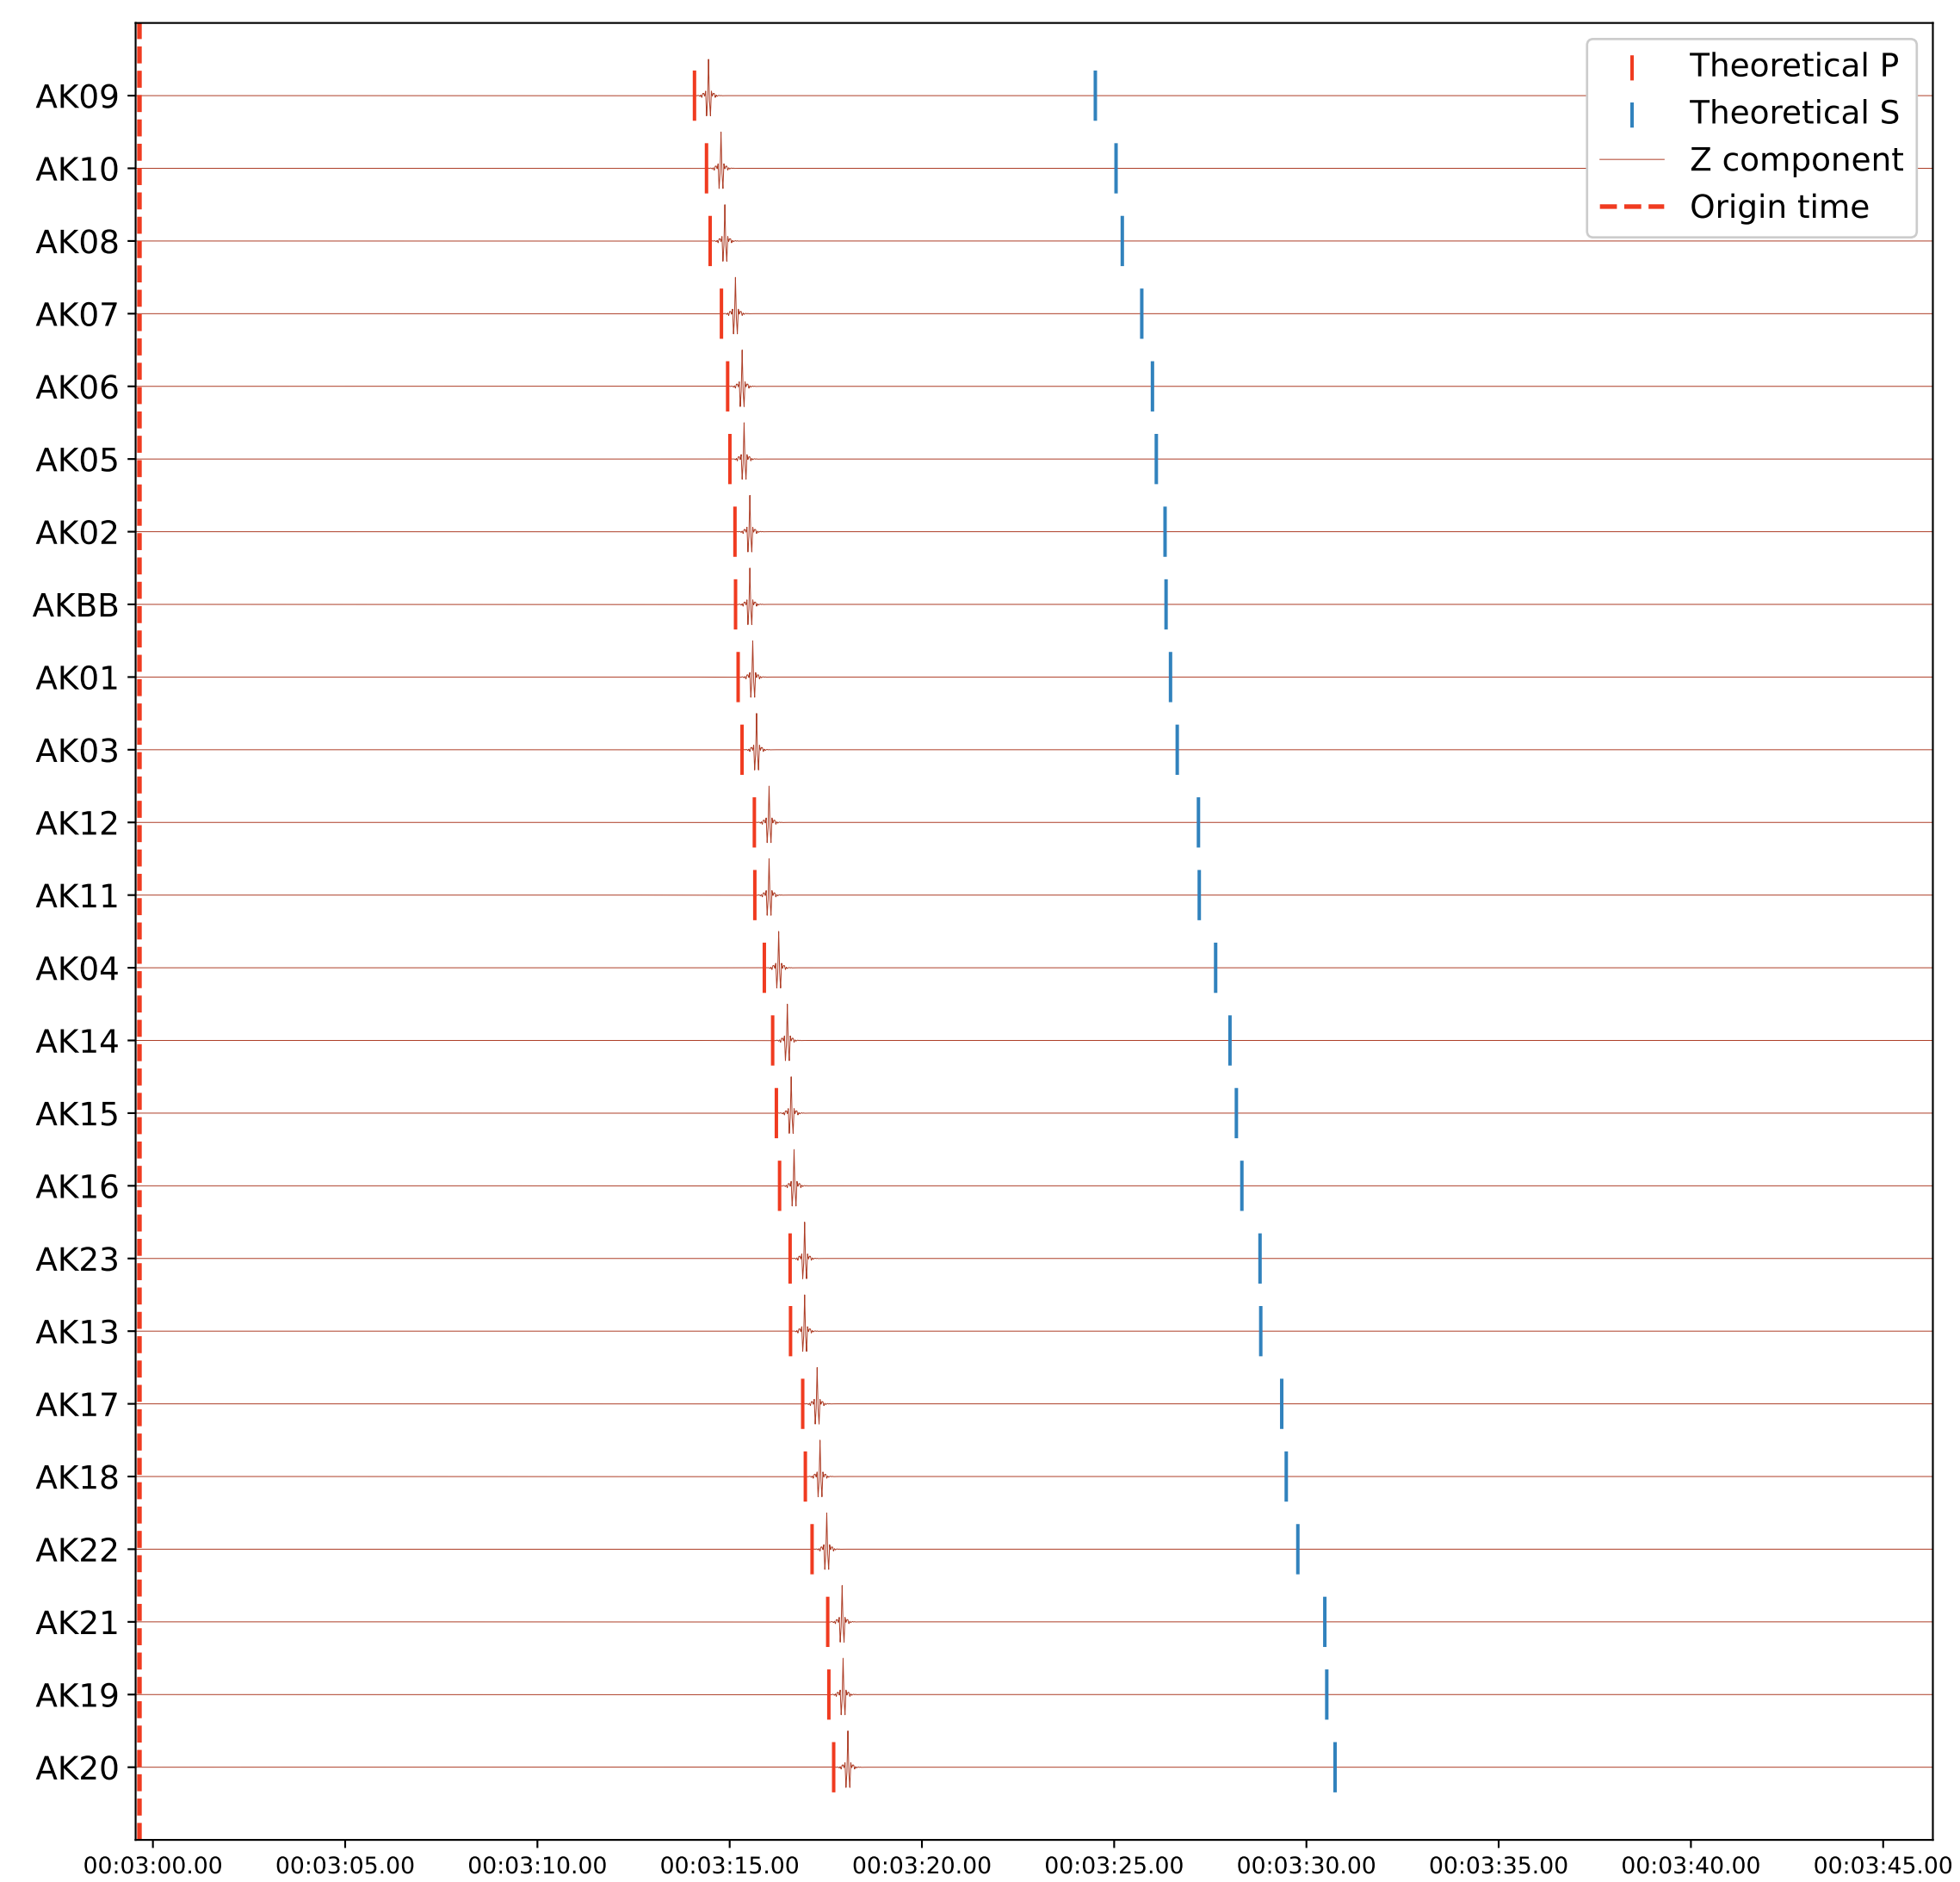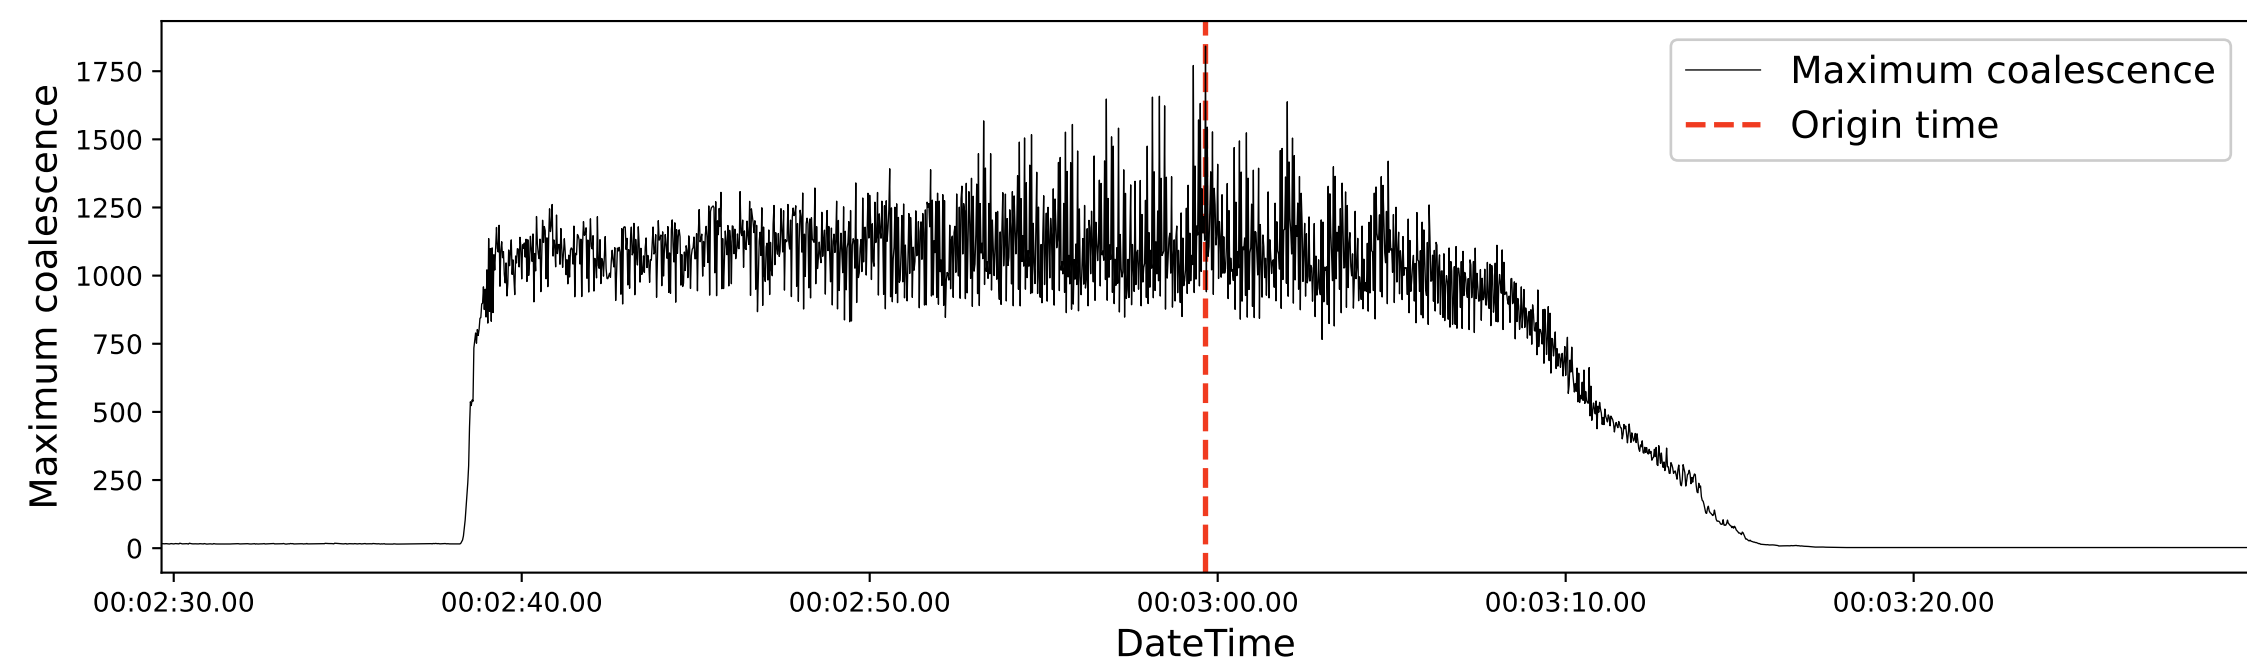



# Kyiv point spread function

Origin time: 2022-01-01 00:02:59.650

Hypocentre: 50.4332°N  
30.514°E

Location error: 0.00 km

Uncertainty ellipse: 110.00 km (semi-major axis)  
29.00 km (semi-minor axis)

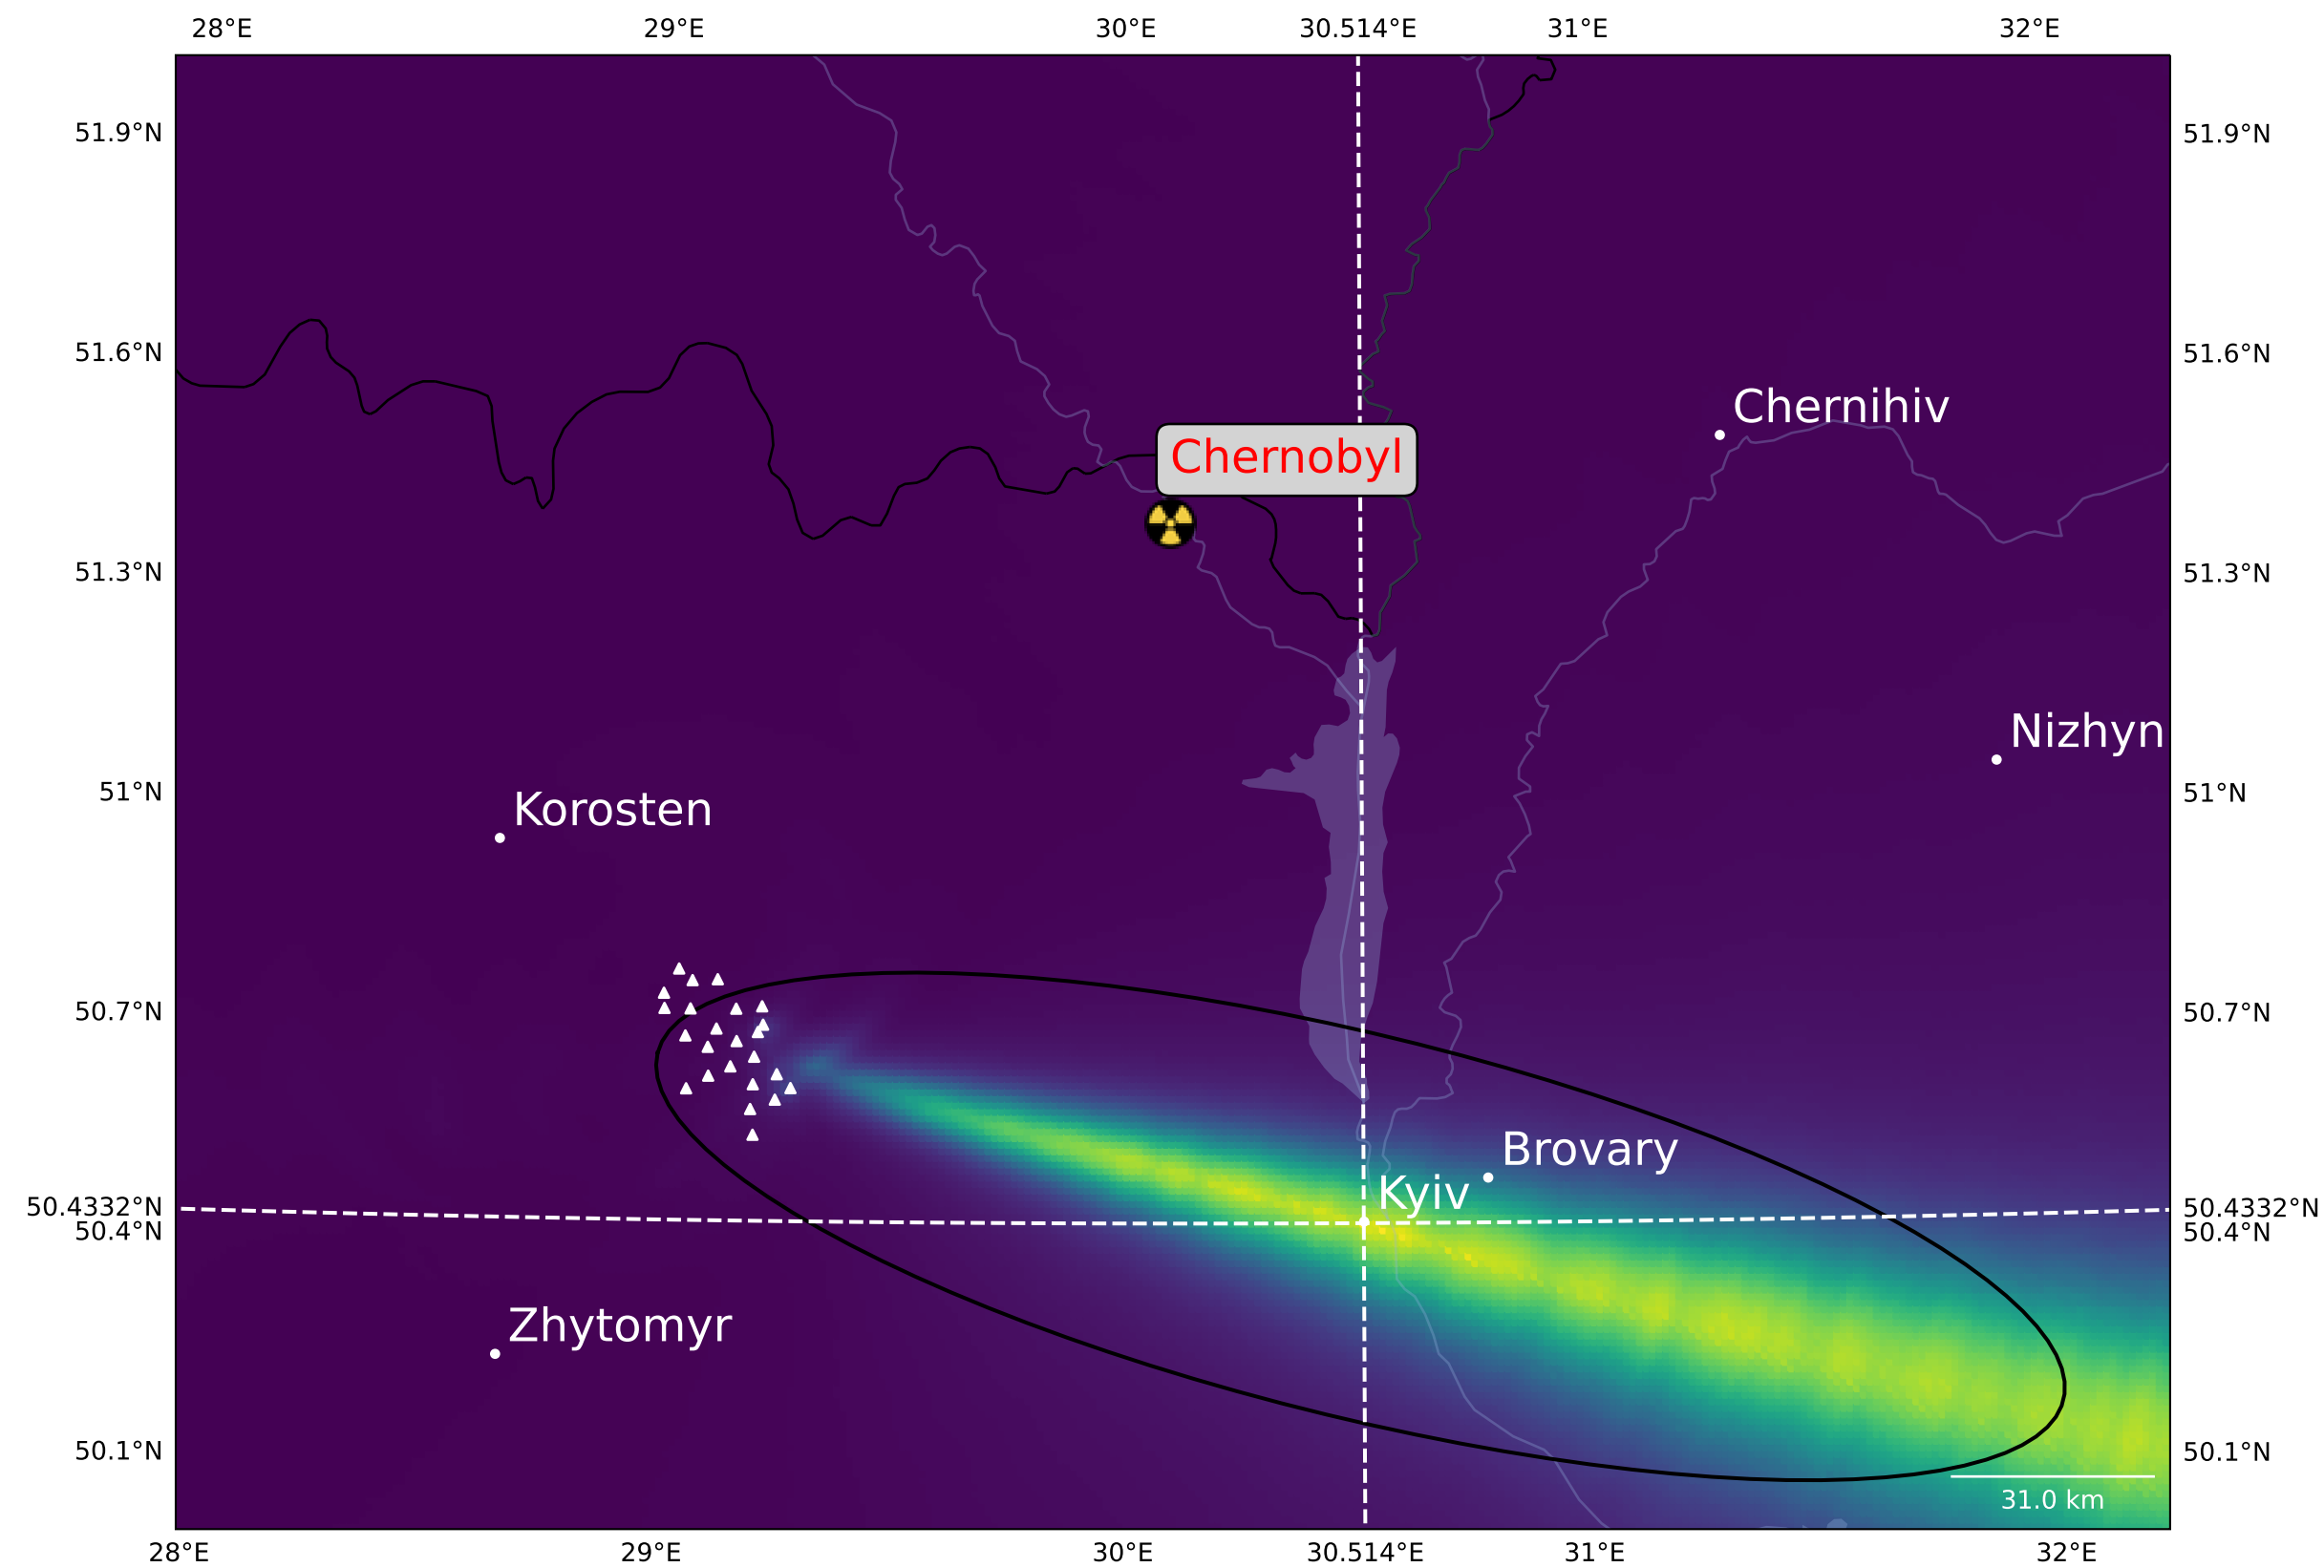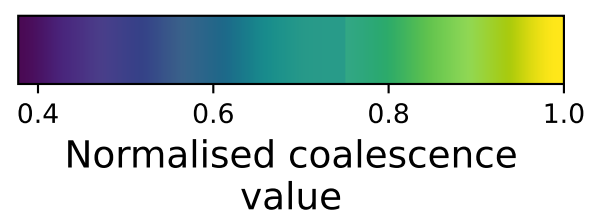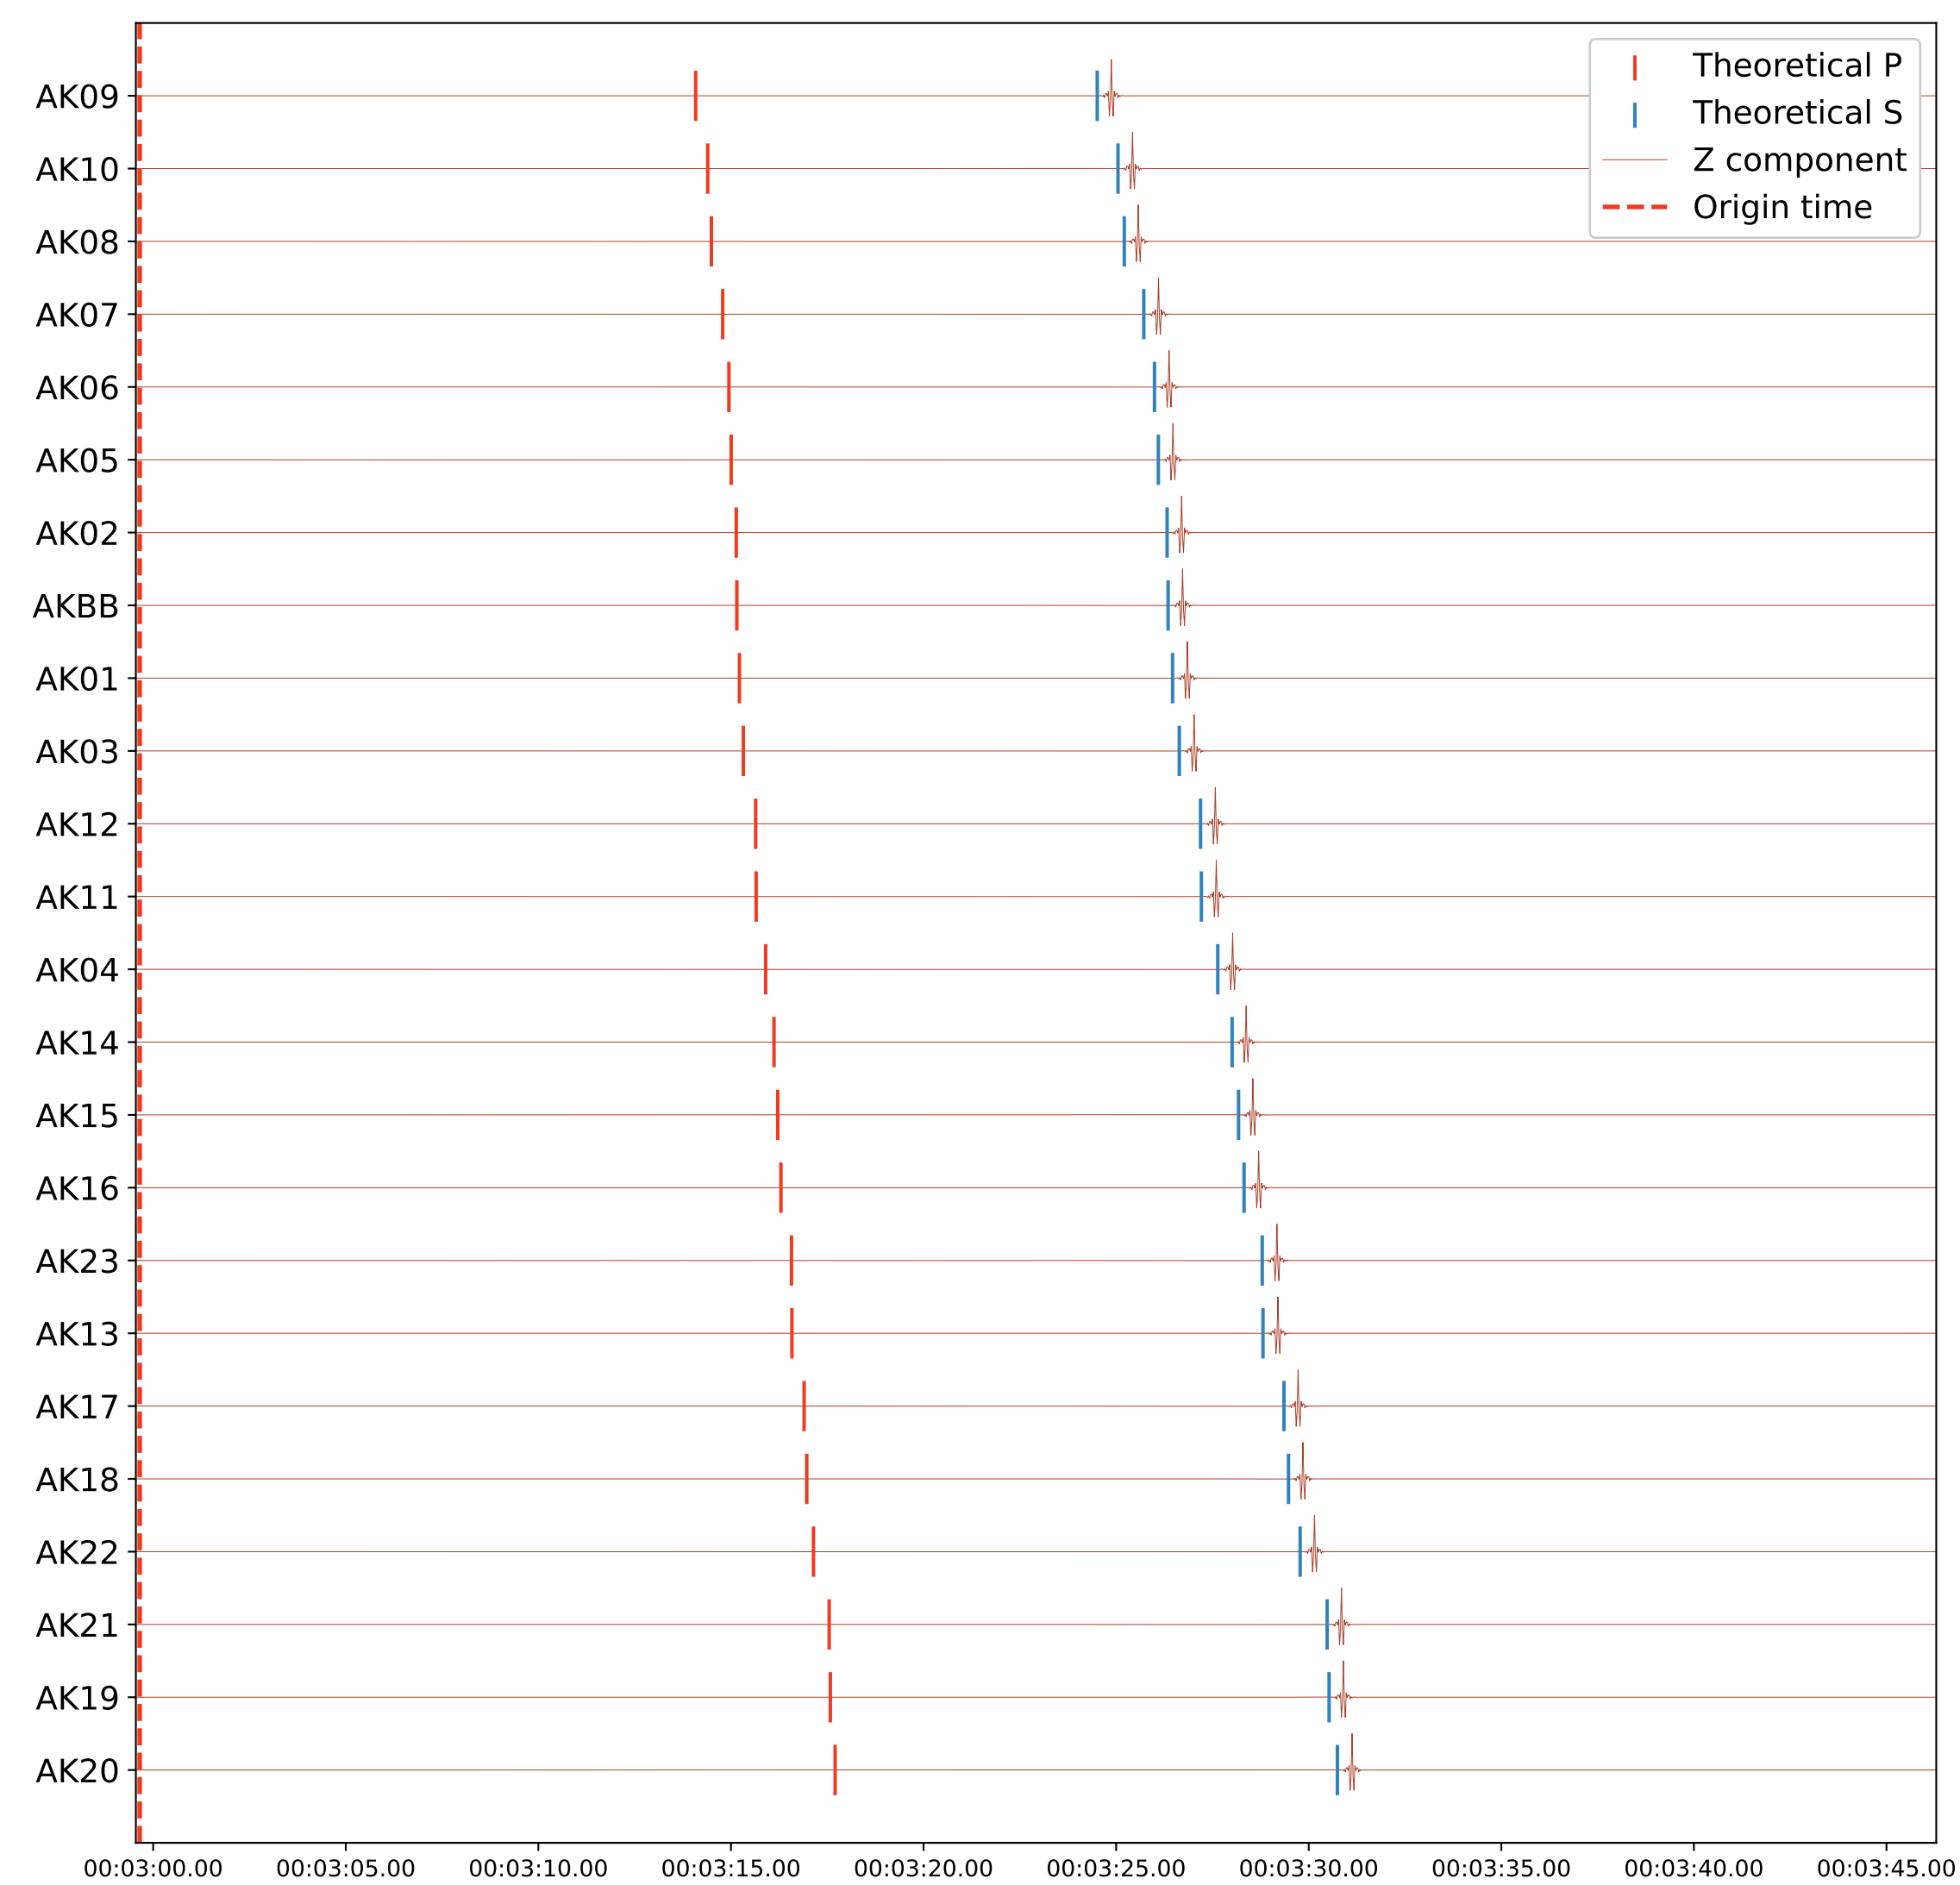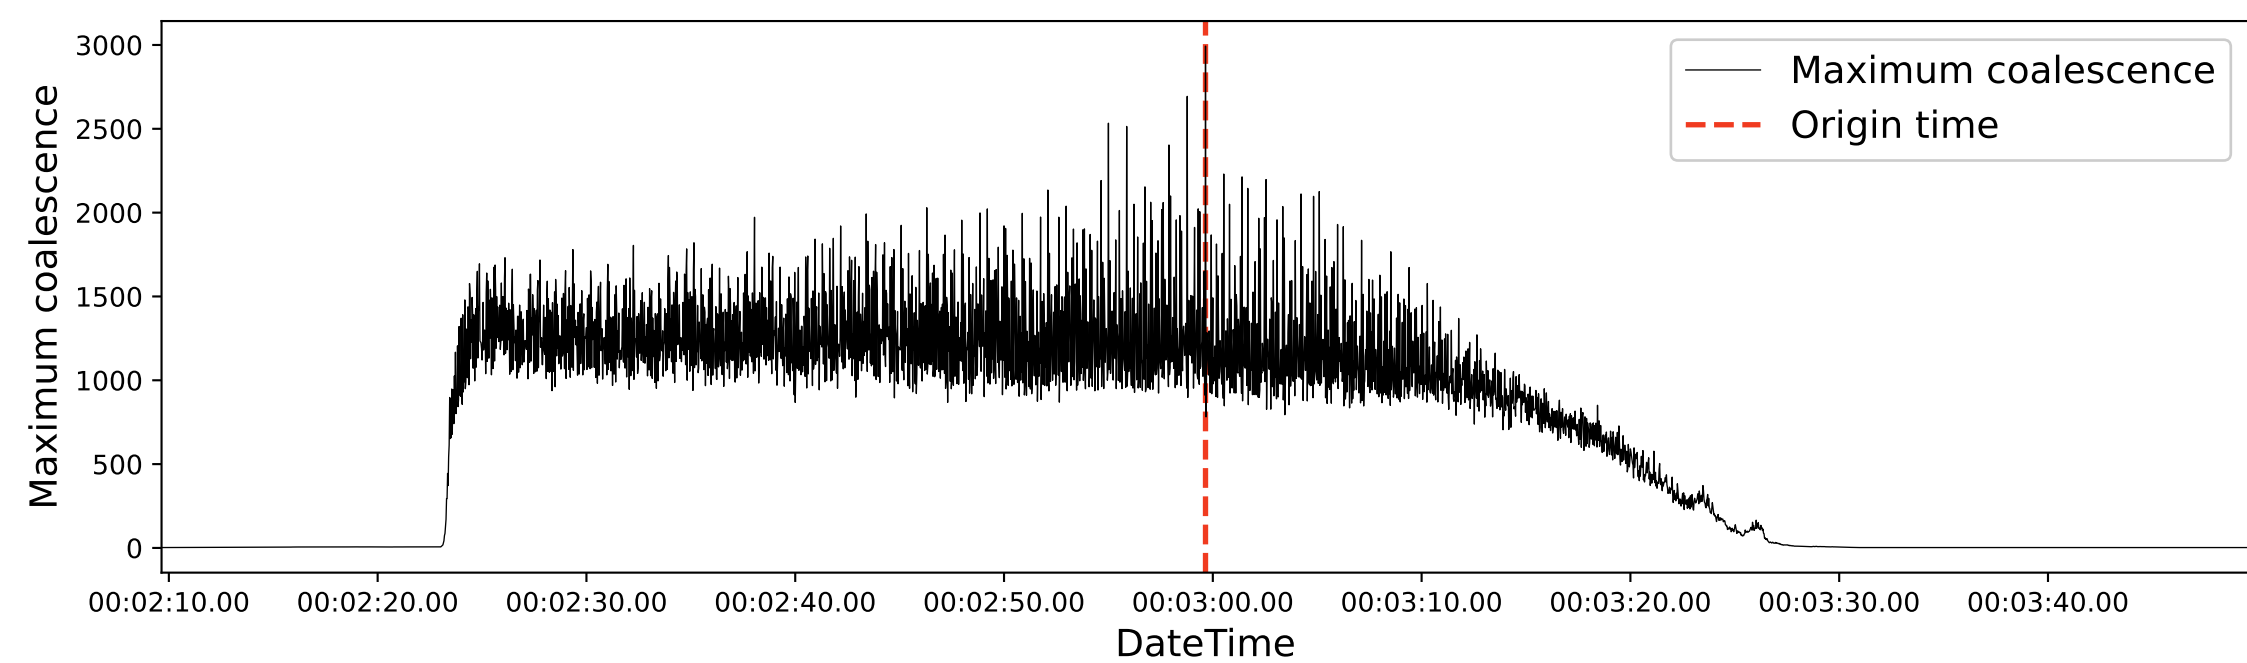

# Kyiv point spread function

Origin time: 2022-01-01 00:02:59.650

Hypocentre: 50.4332°N  
30.514°E

Location error: 0.00 km

Uncertainty ellipse: 4.10 km (semi-major axis)  
1.10 km (semi-minor axis)

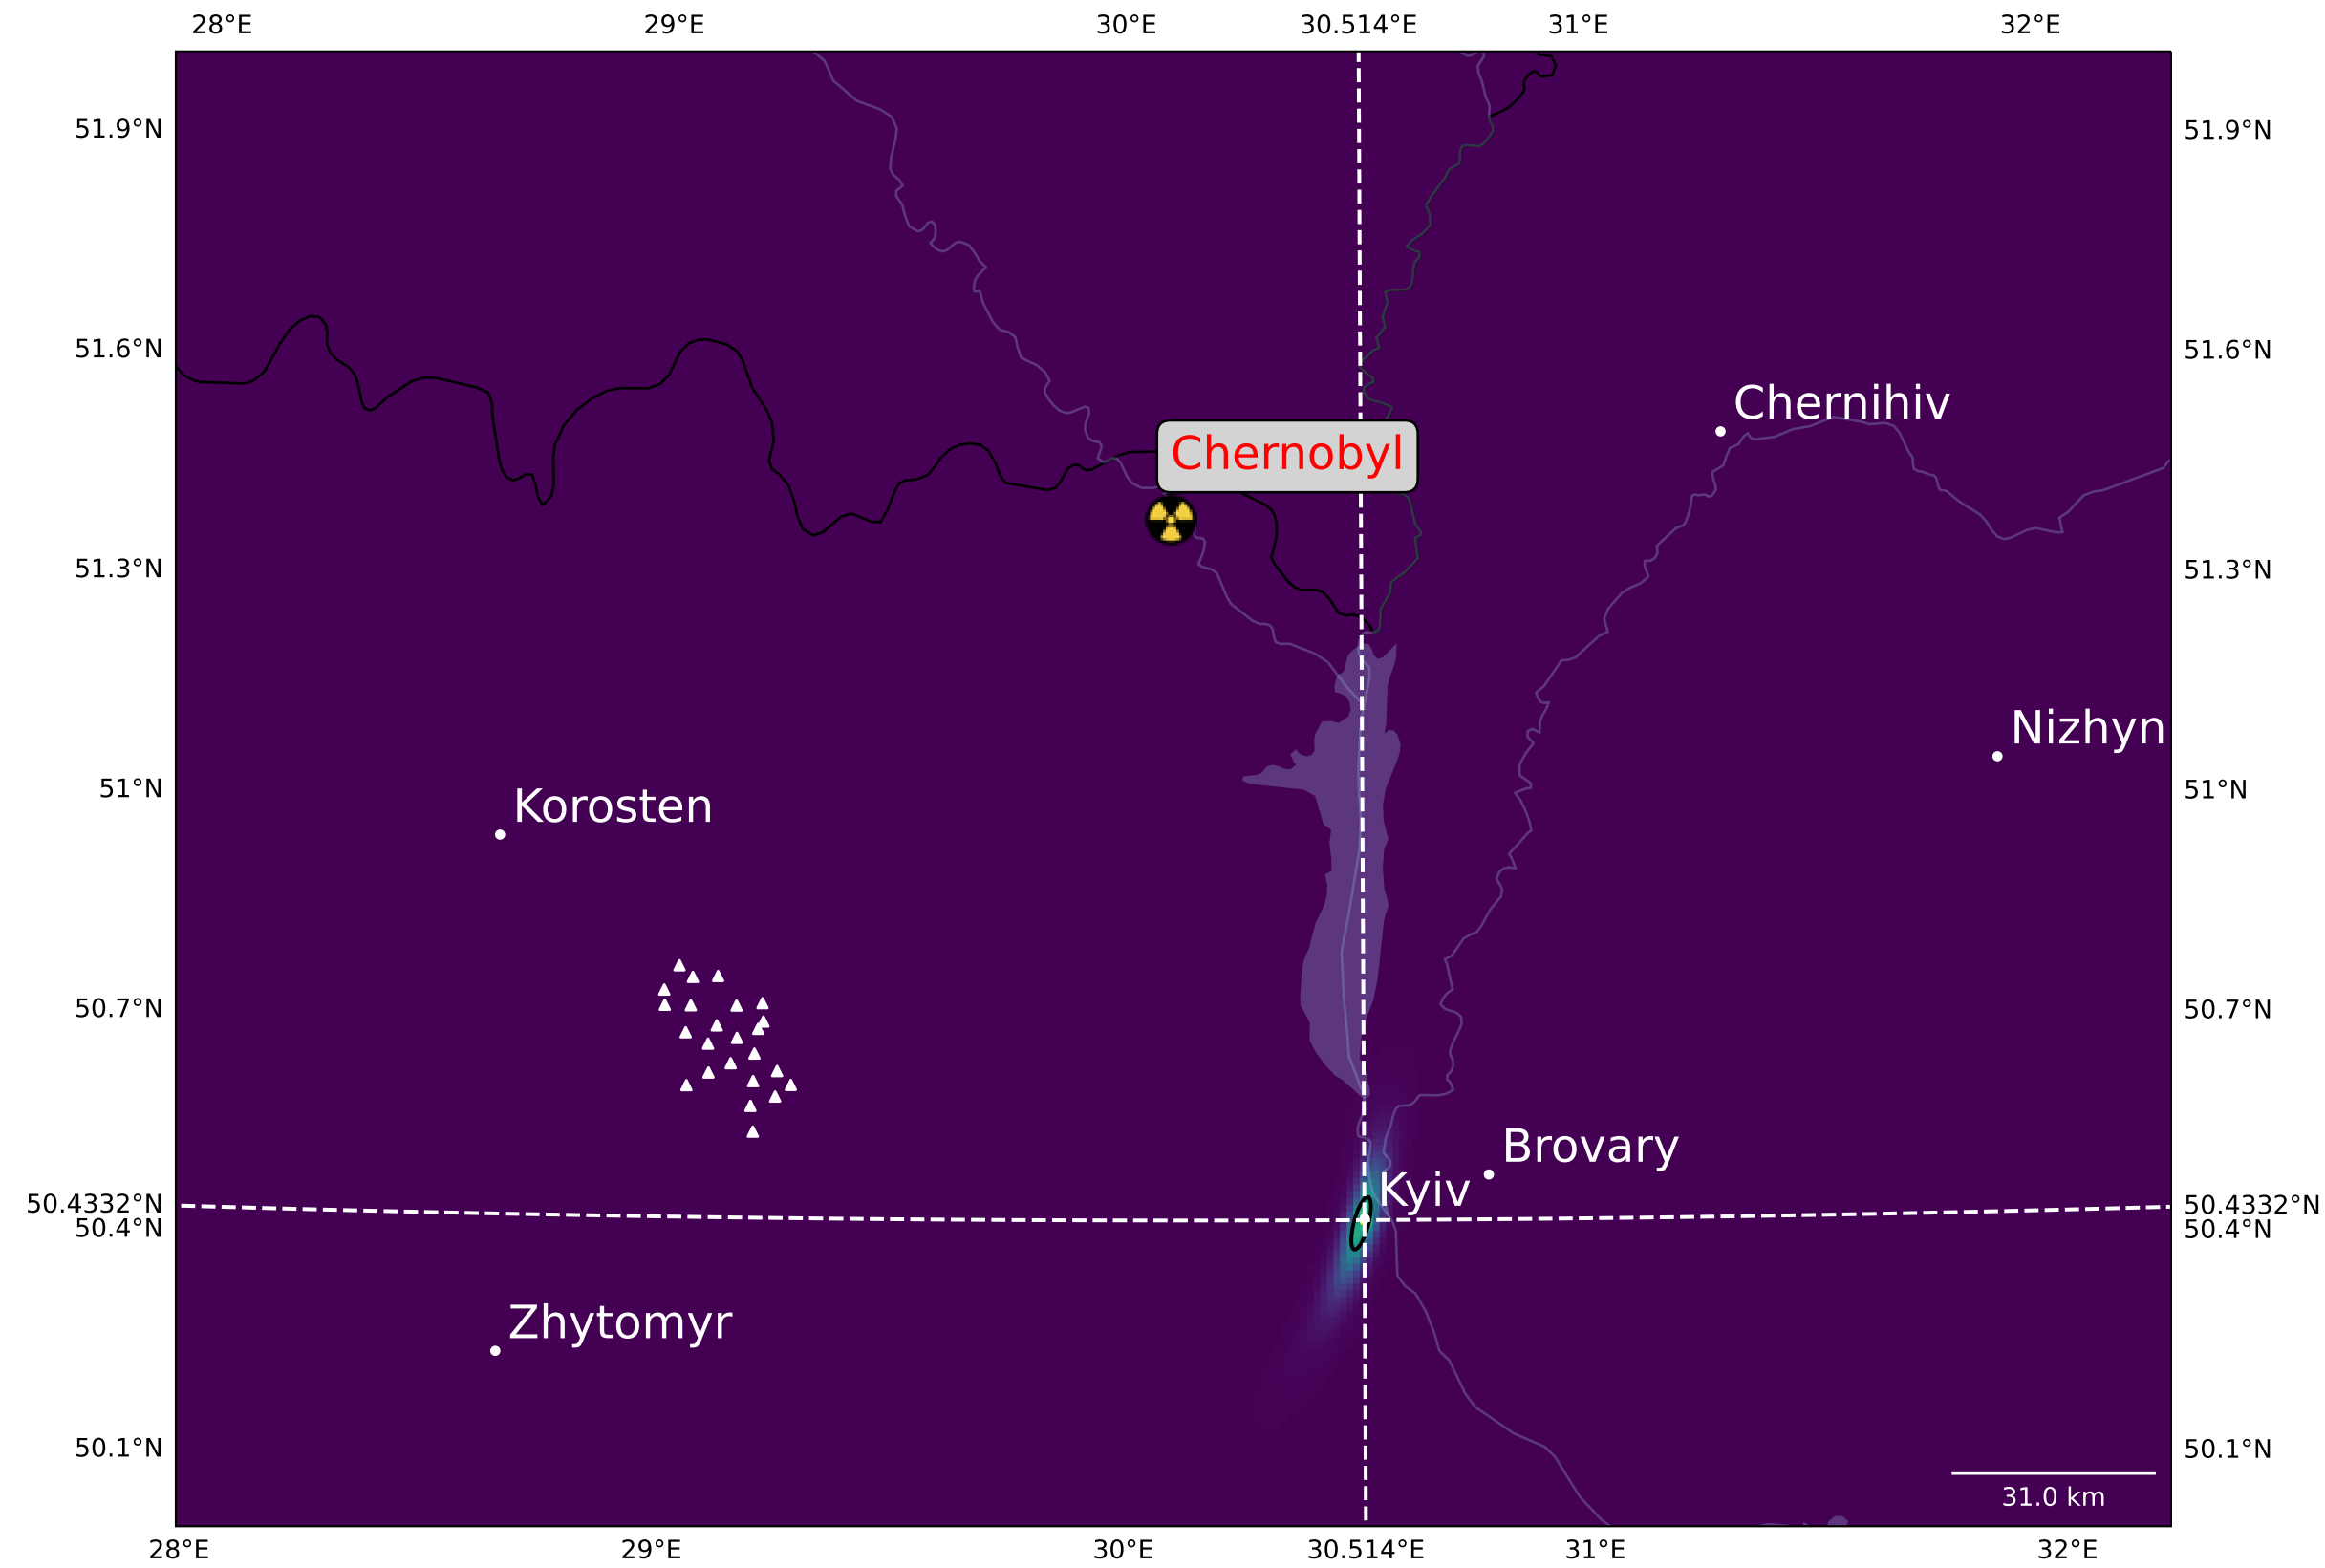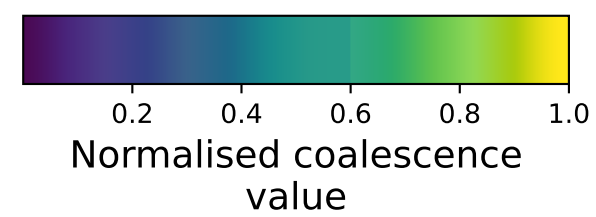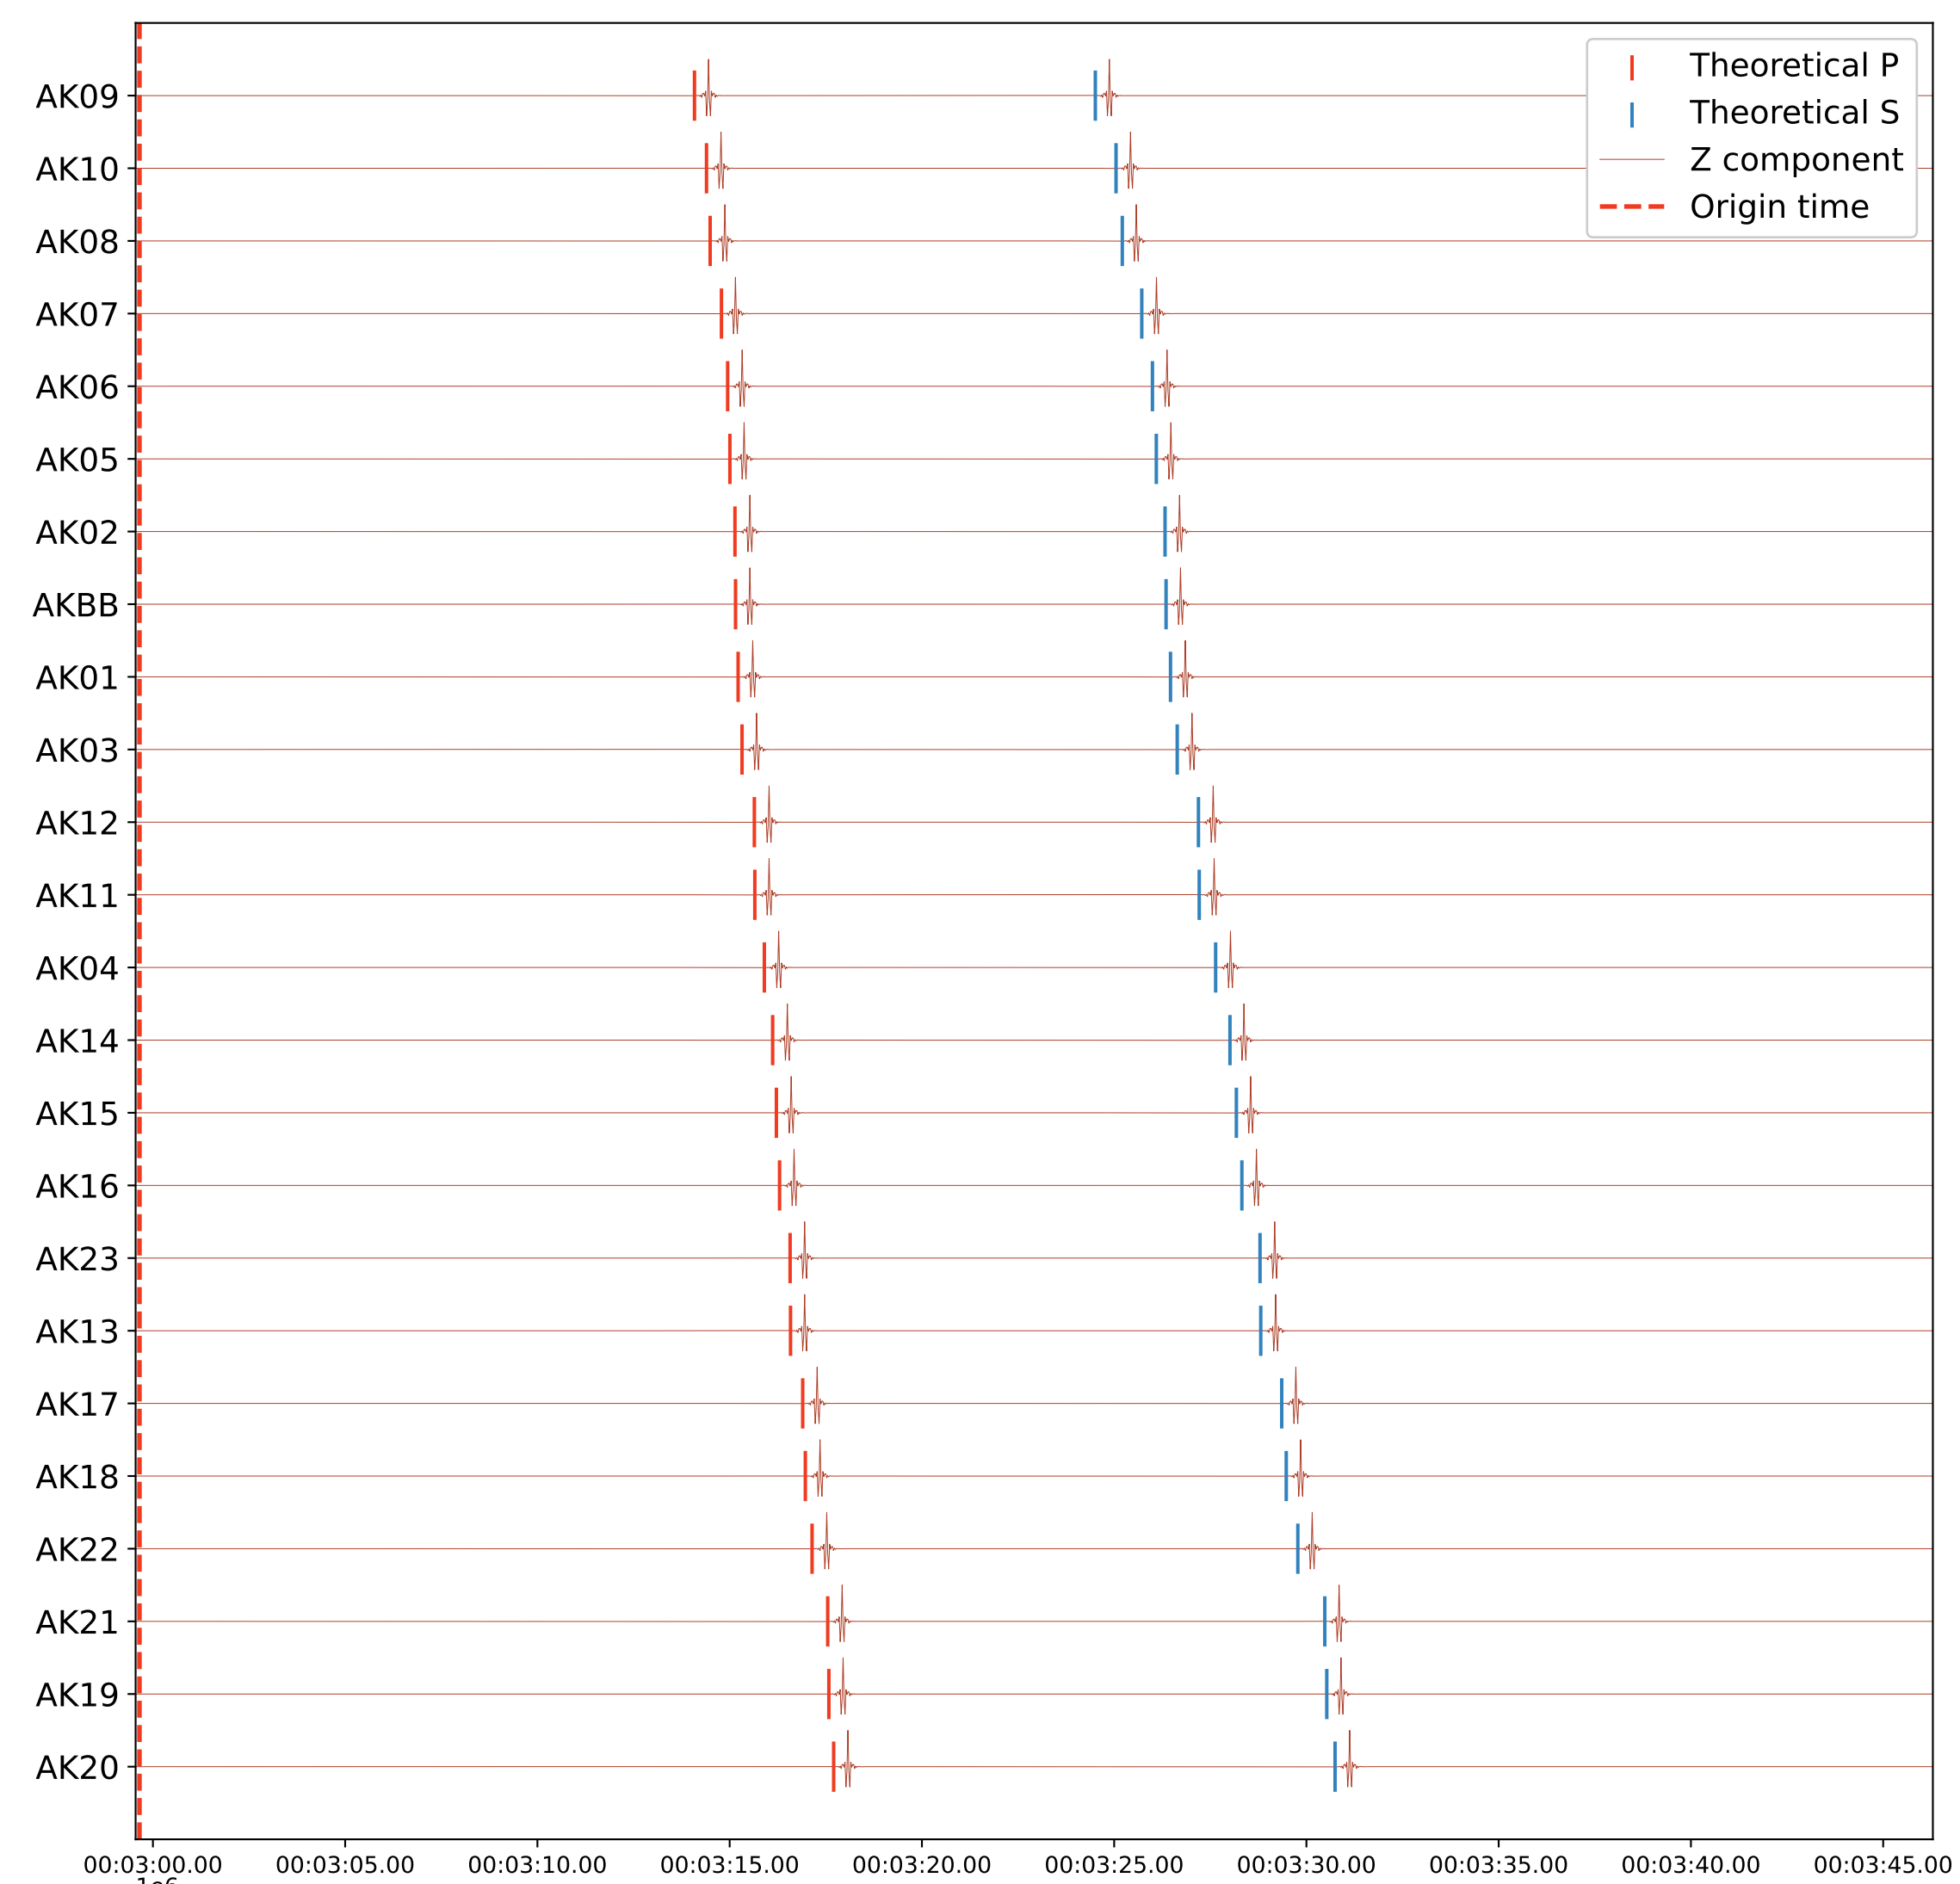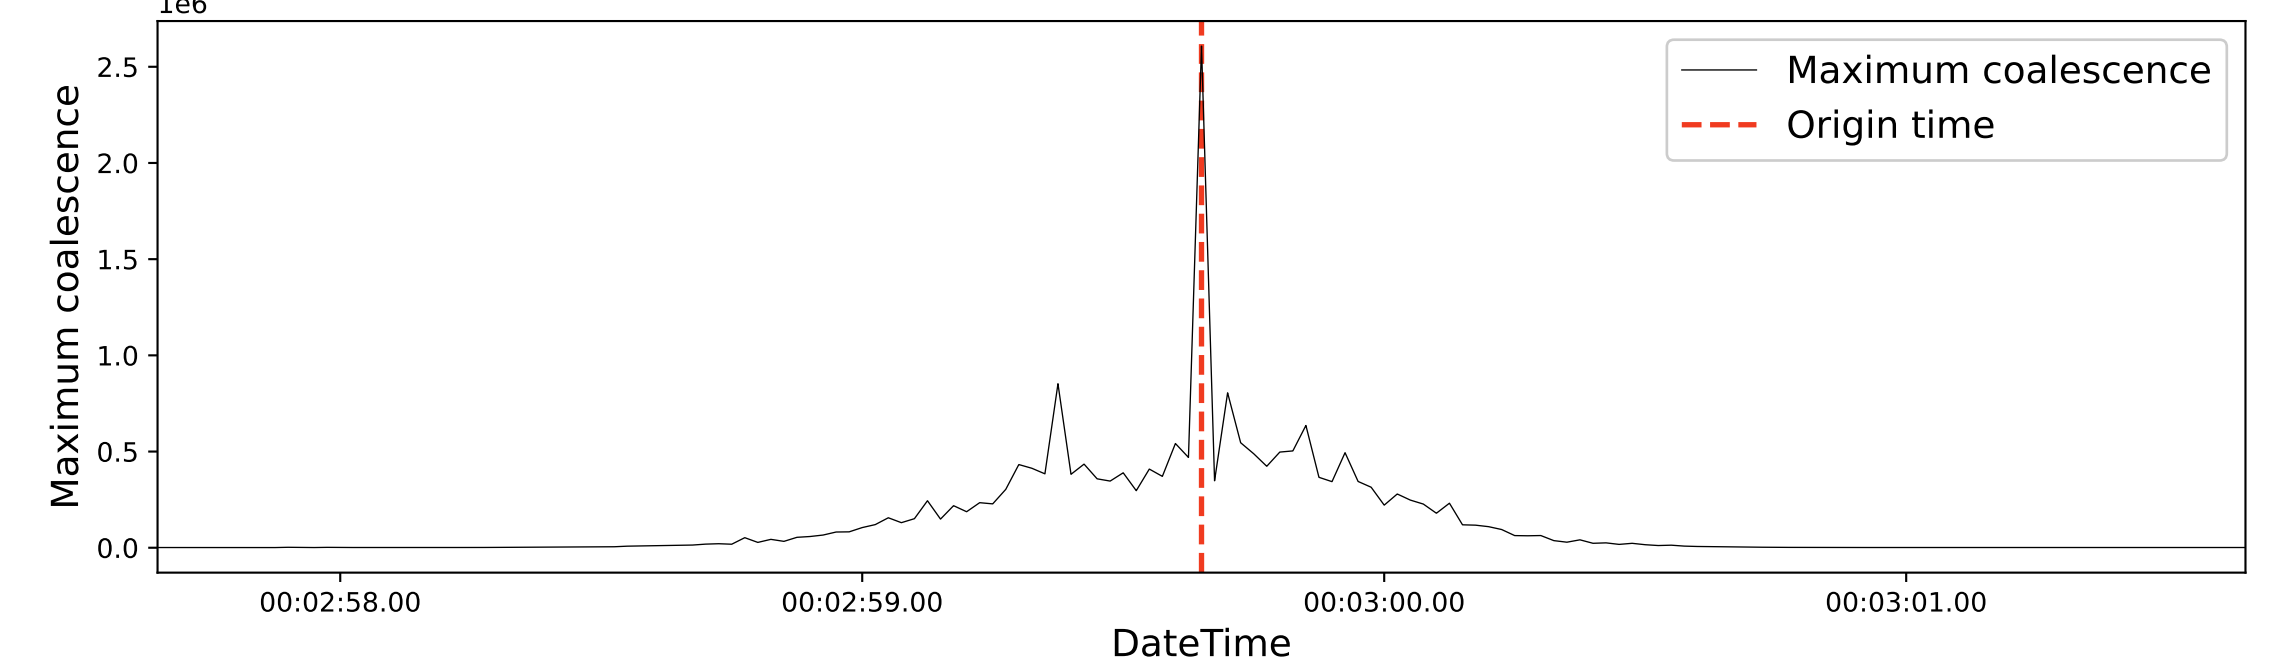

# Malyn point spread function

Origin time: 2022-01-01 00:02:59.650

Hypocentre: 50.7722°N  
29.2974°E

Location error: 0.00 km

Uncertainty ellipse: 100.00 km (semi-major axis)  
60.00 km (semi-minor axis)

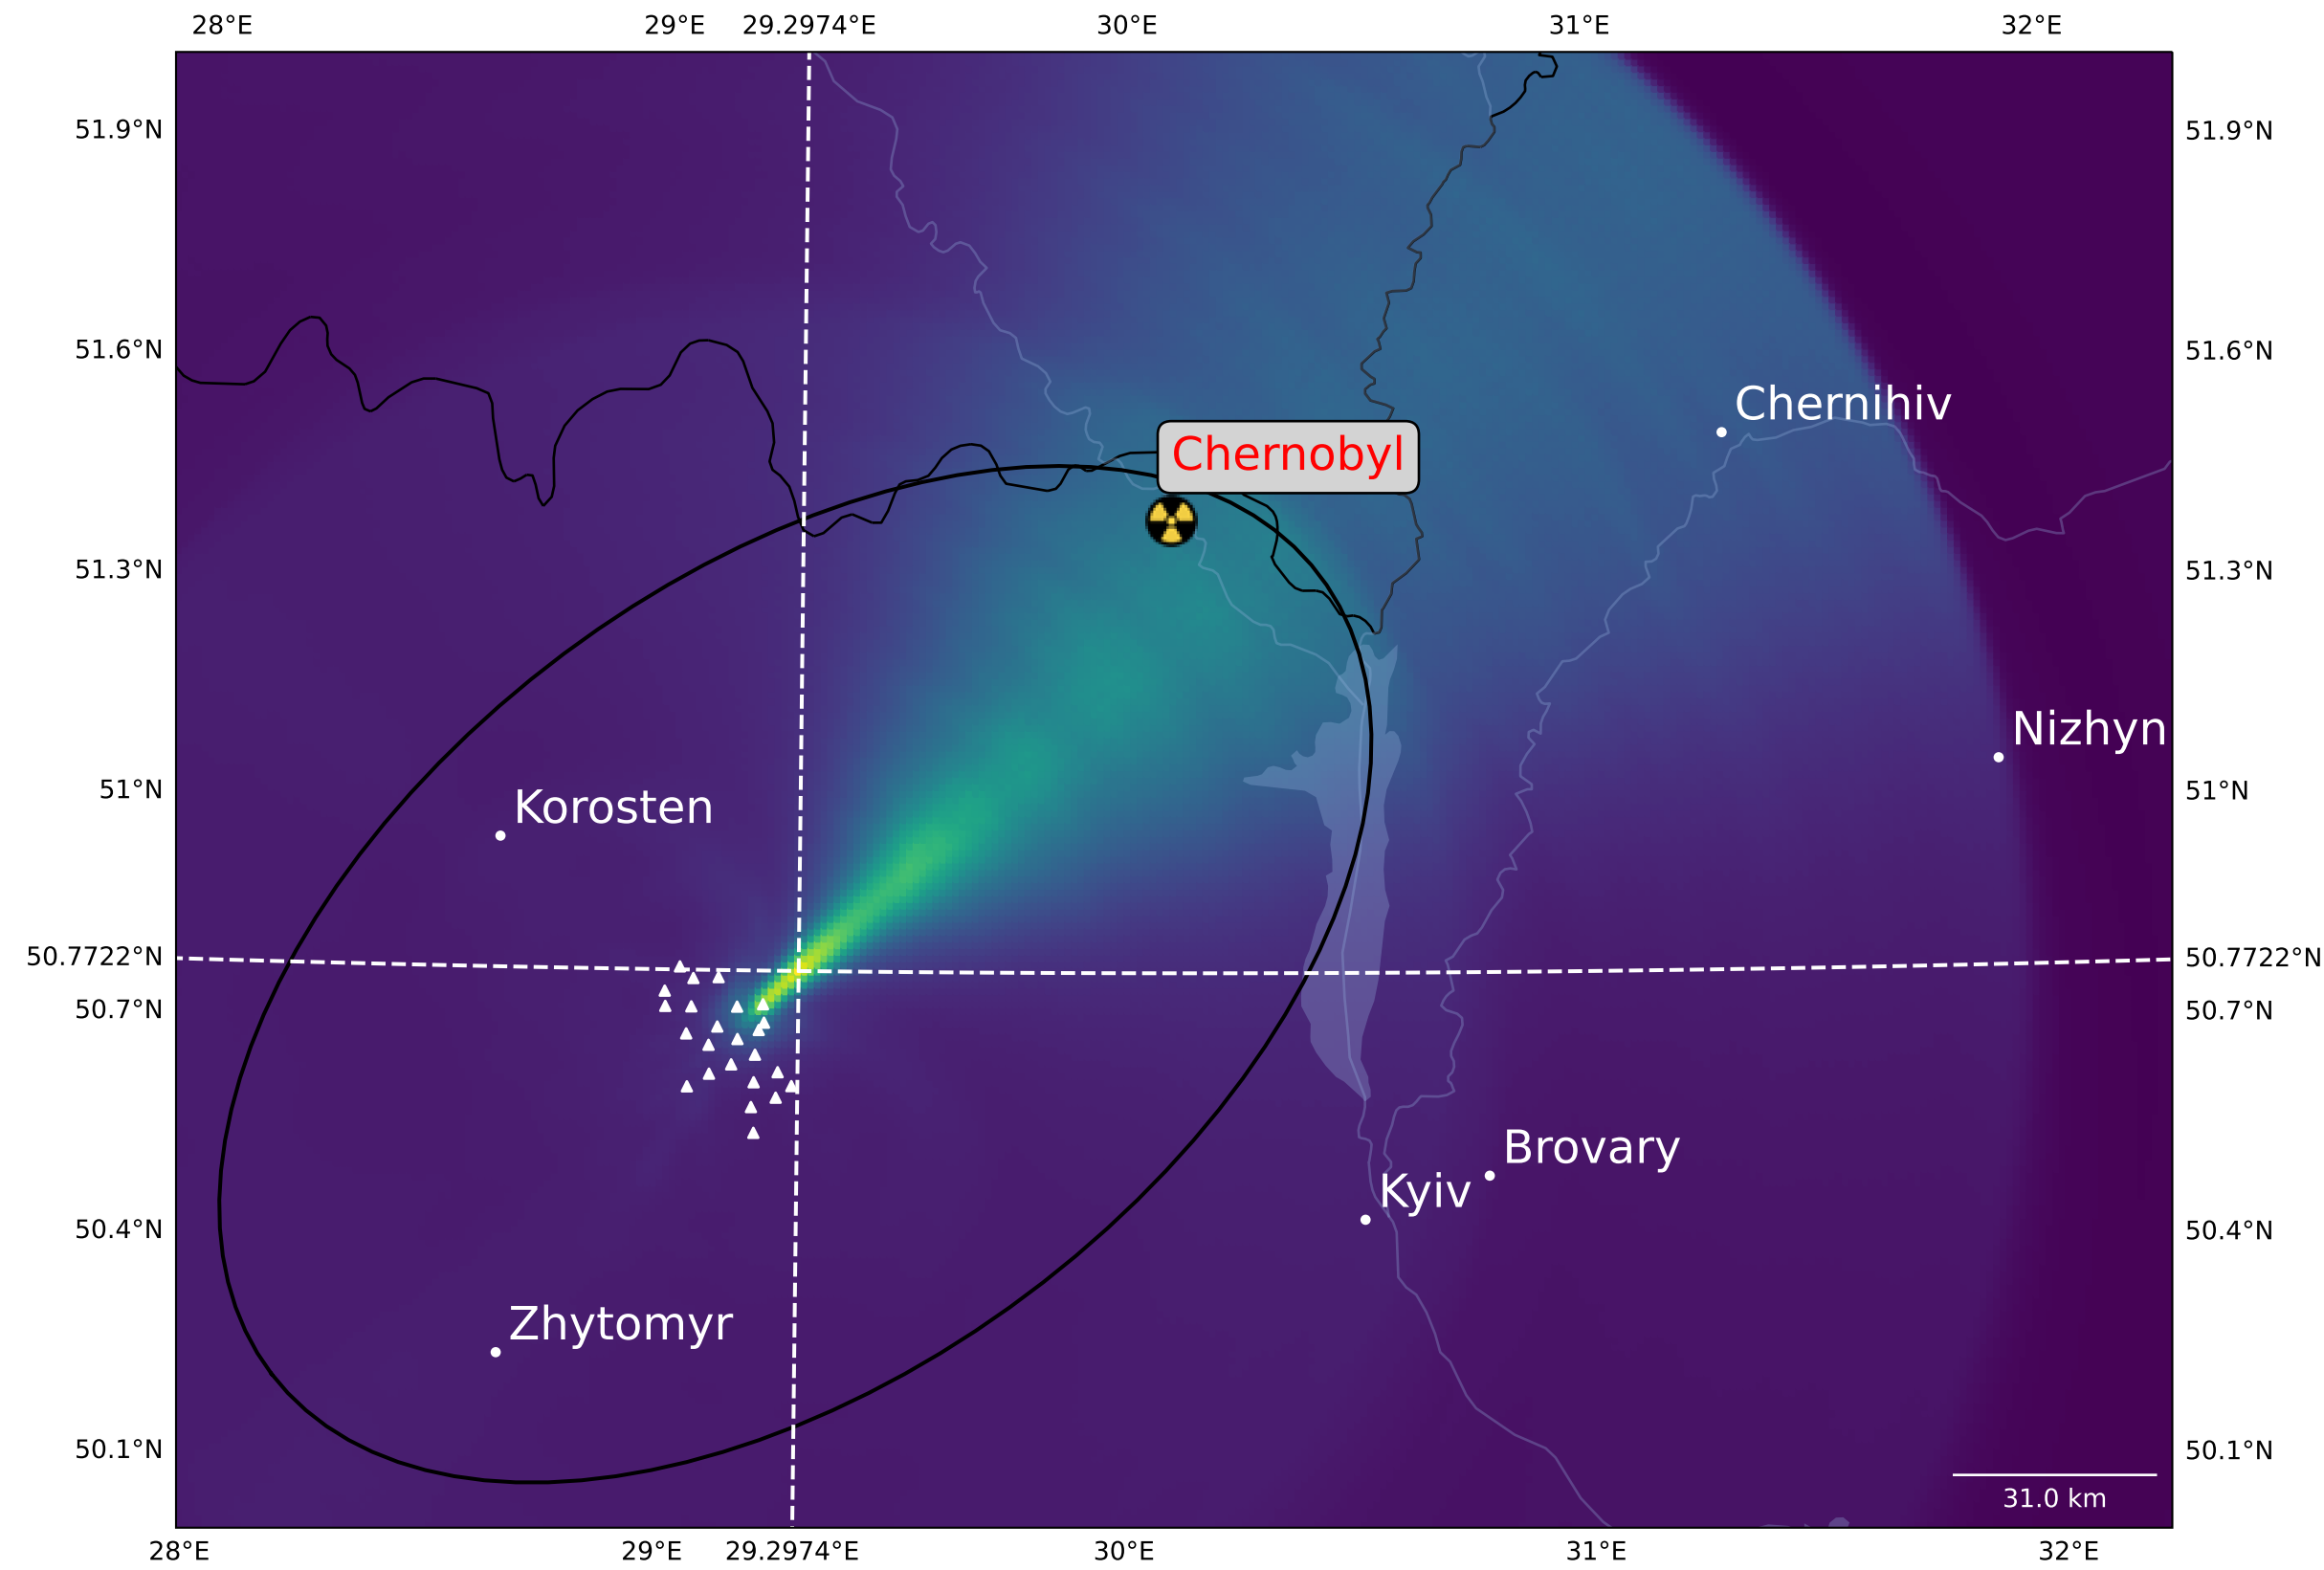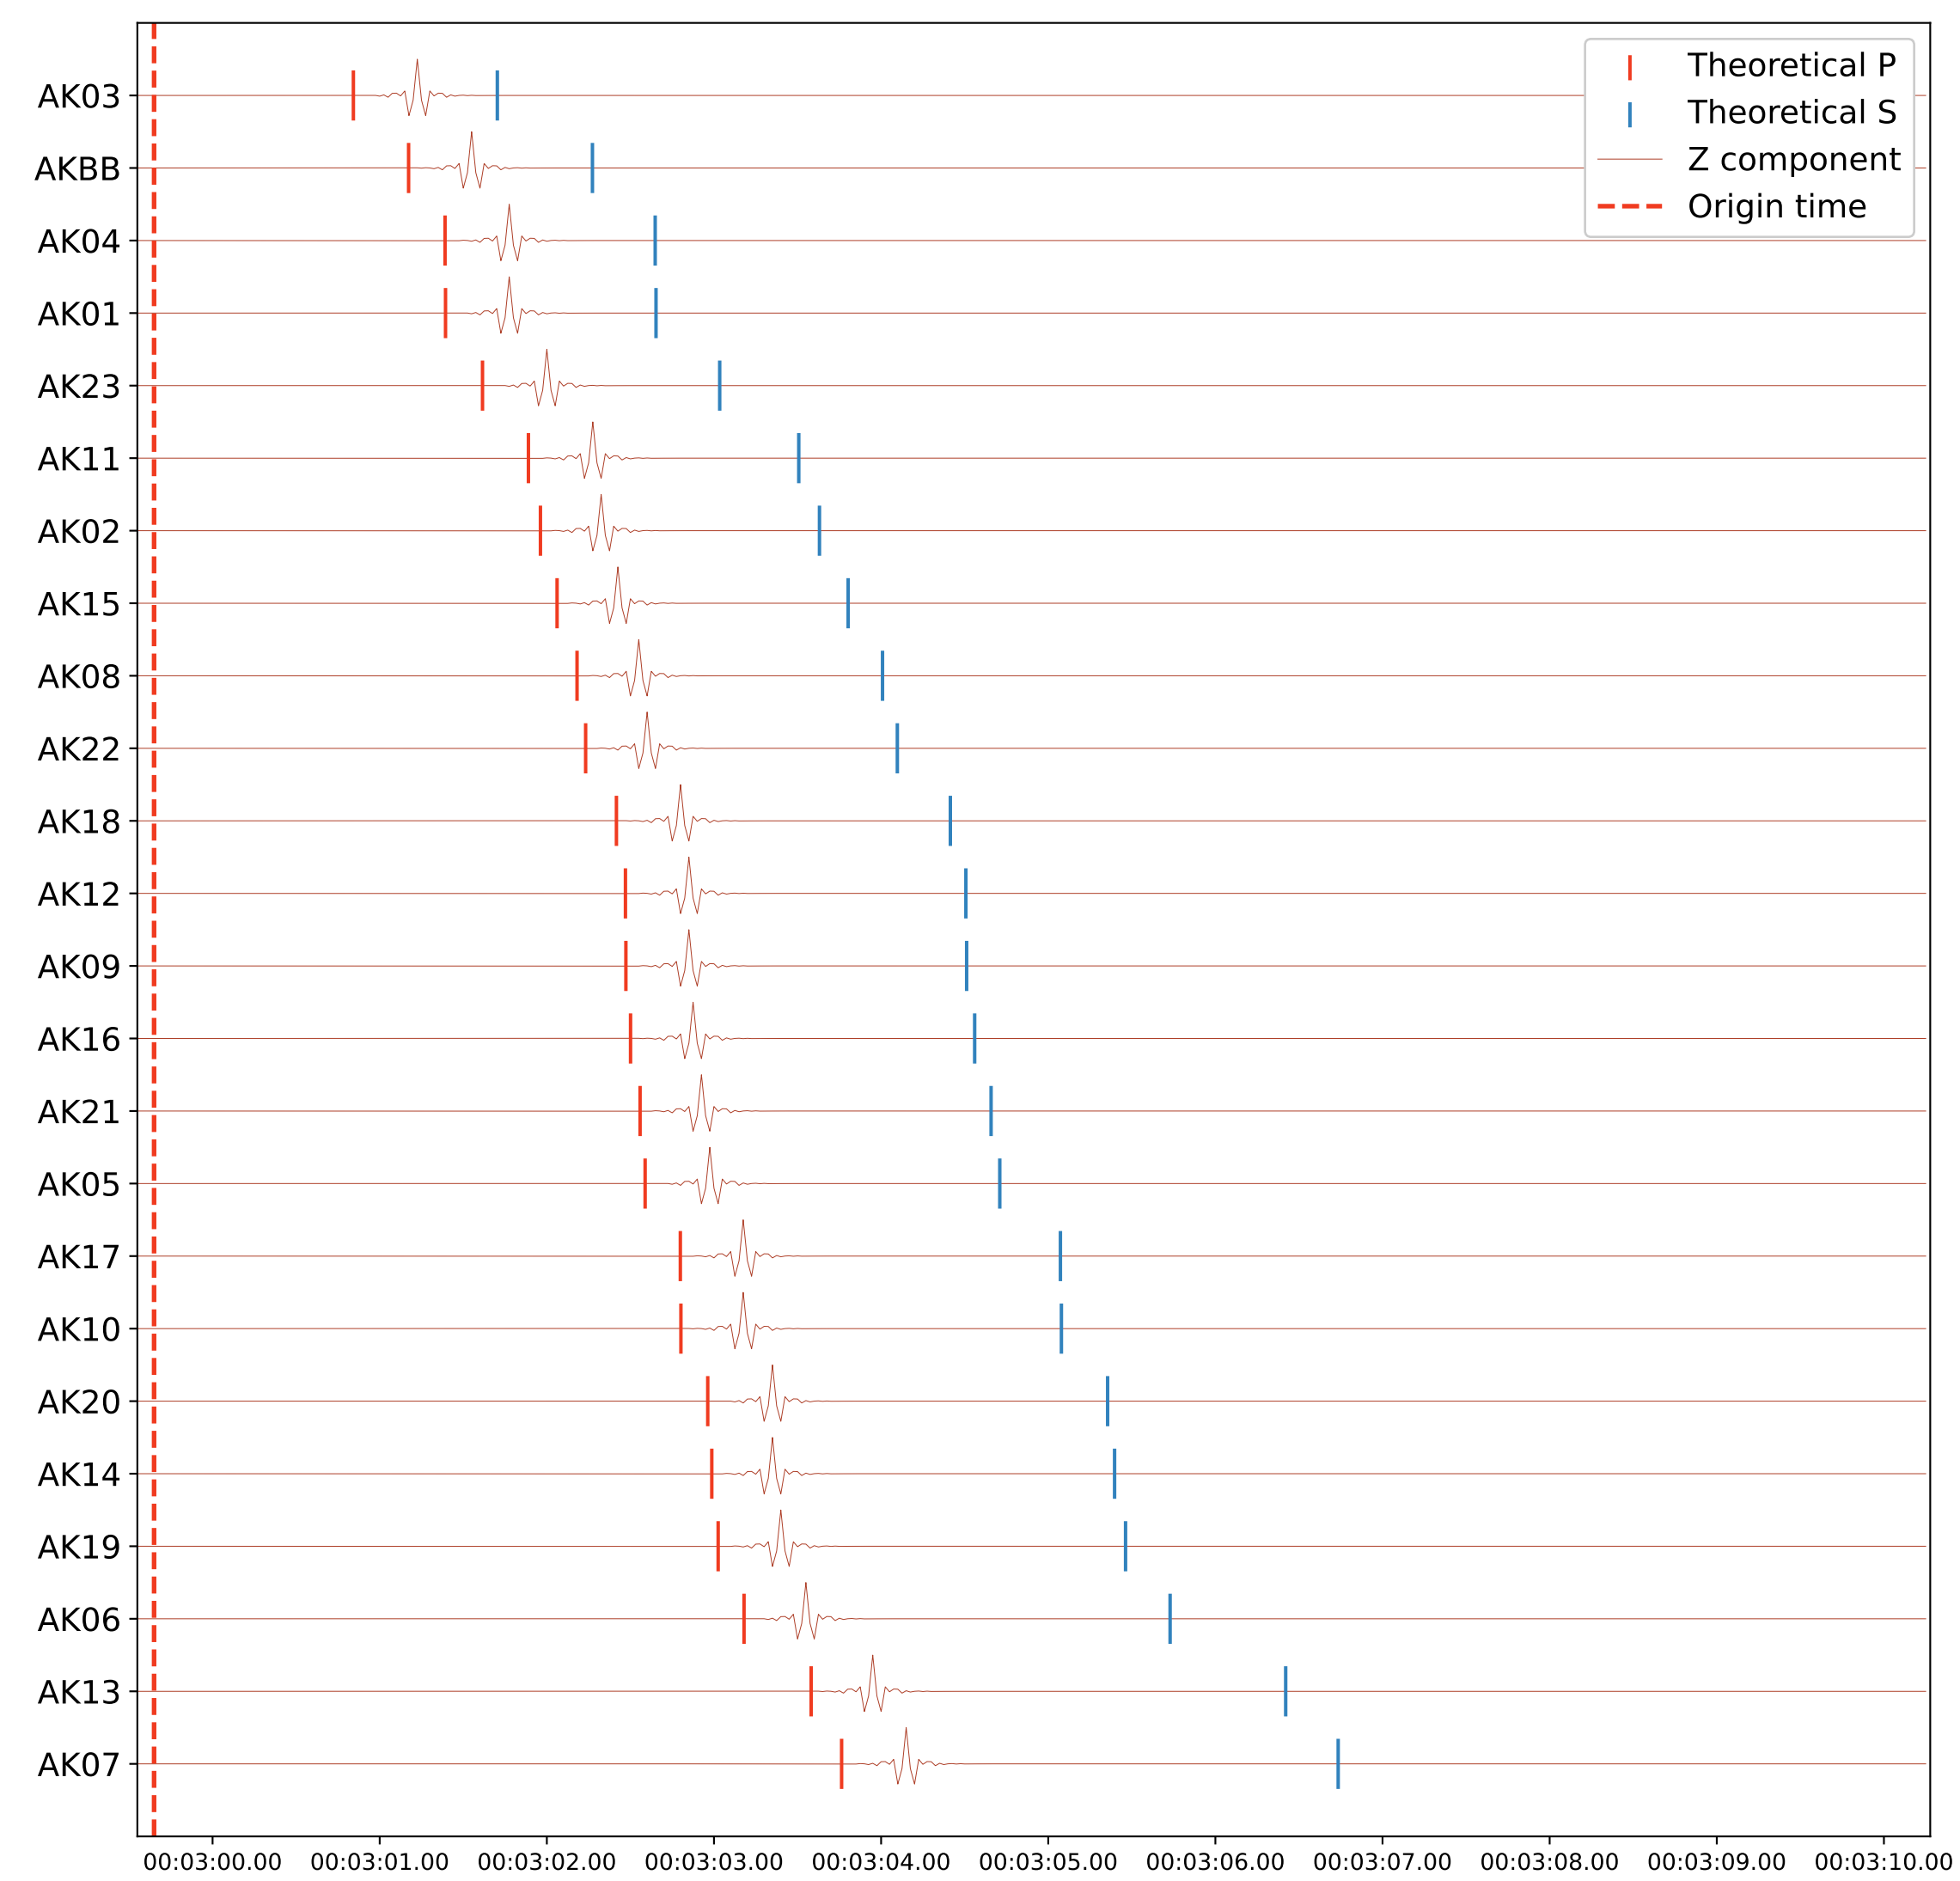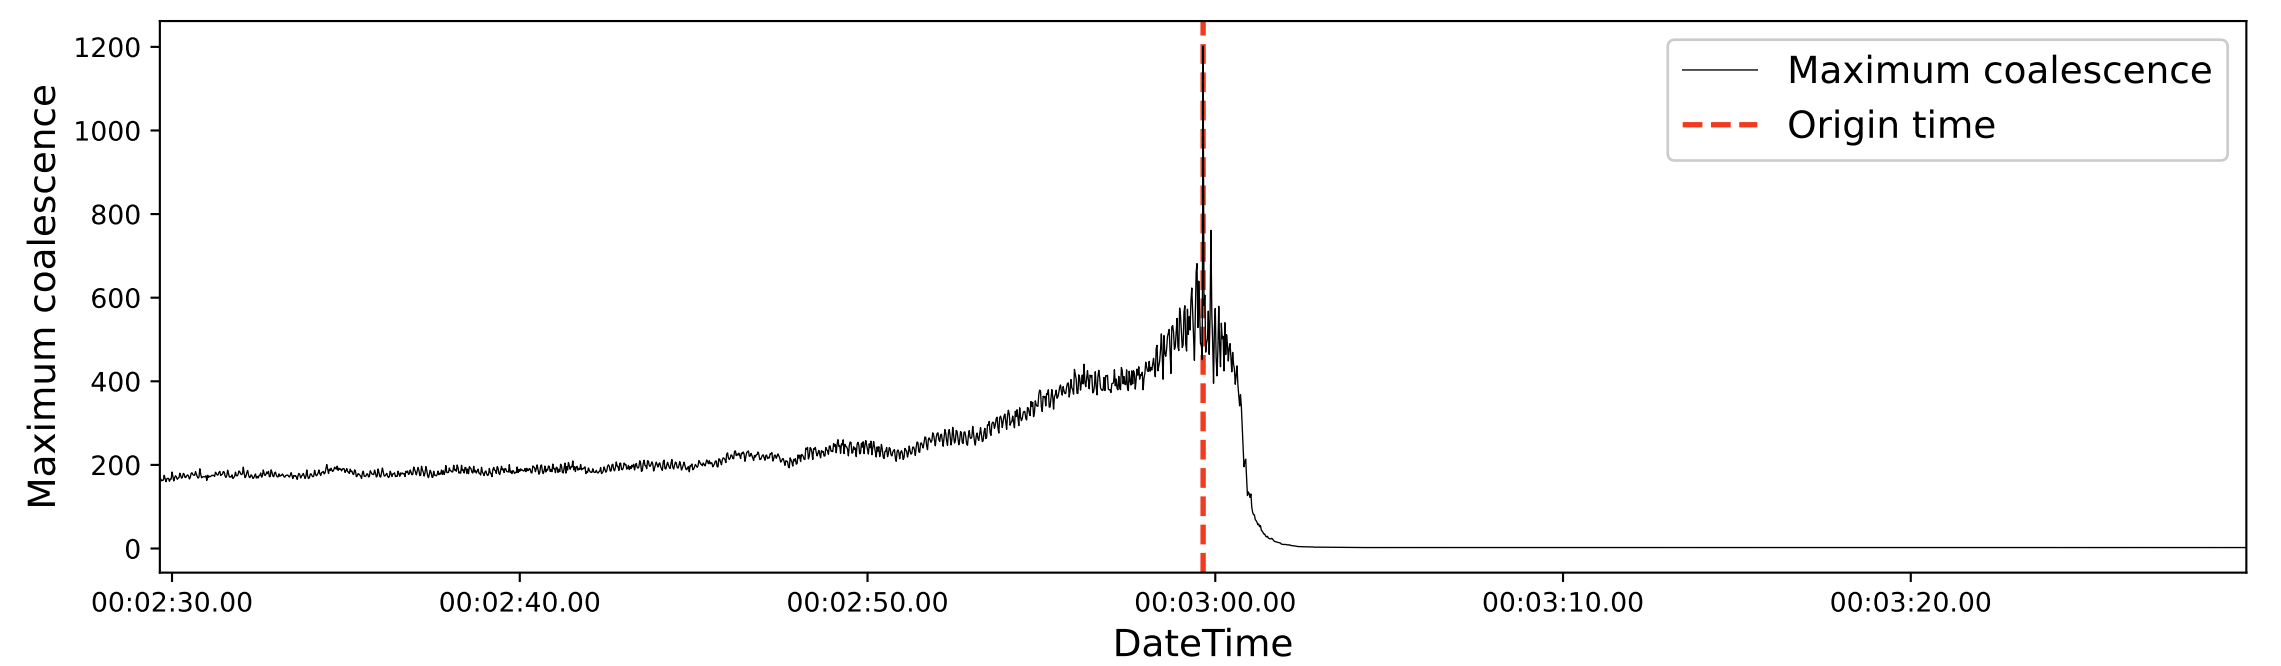

# Malyn point spread function

Origin time: 2022-01-01 00:02:59.650

Hypocentre: 50.7722°N  
29.2974°E

Location error: 0.00 km

Uncertainty ellipse: 14.00 km (semi-major axis)  
3.30 km (semi-minor axis)

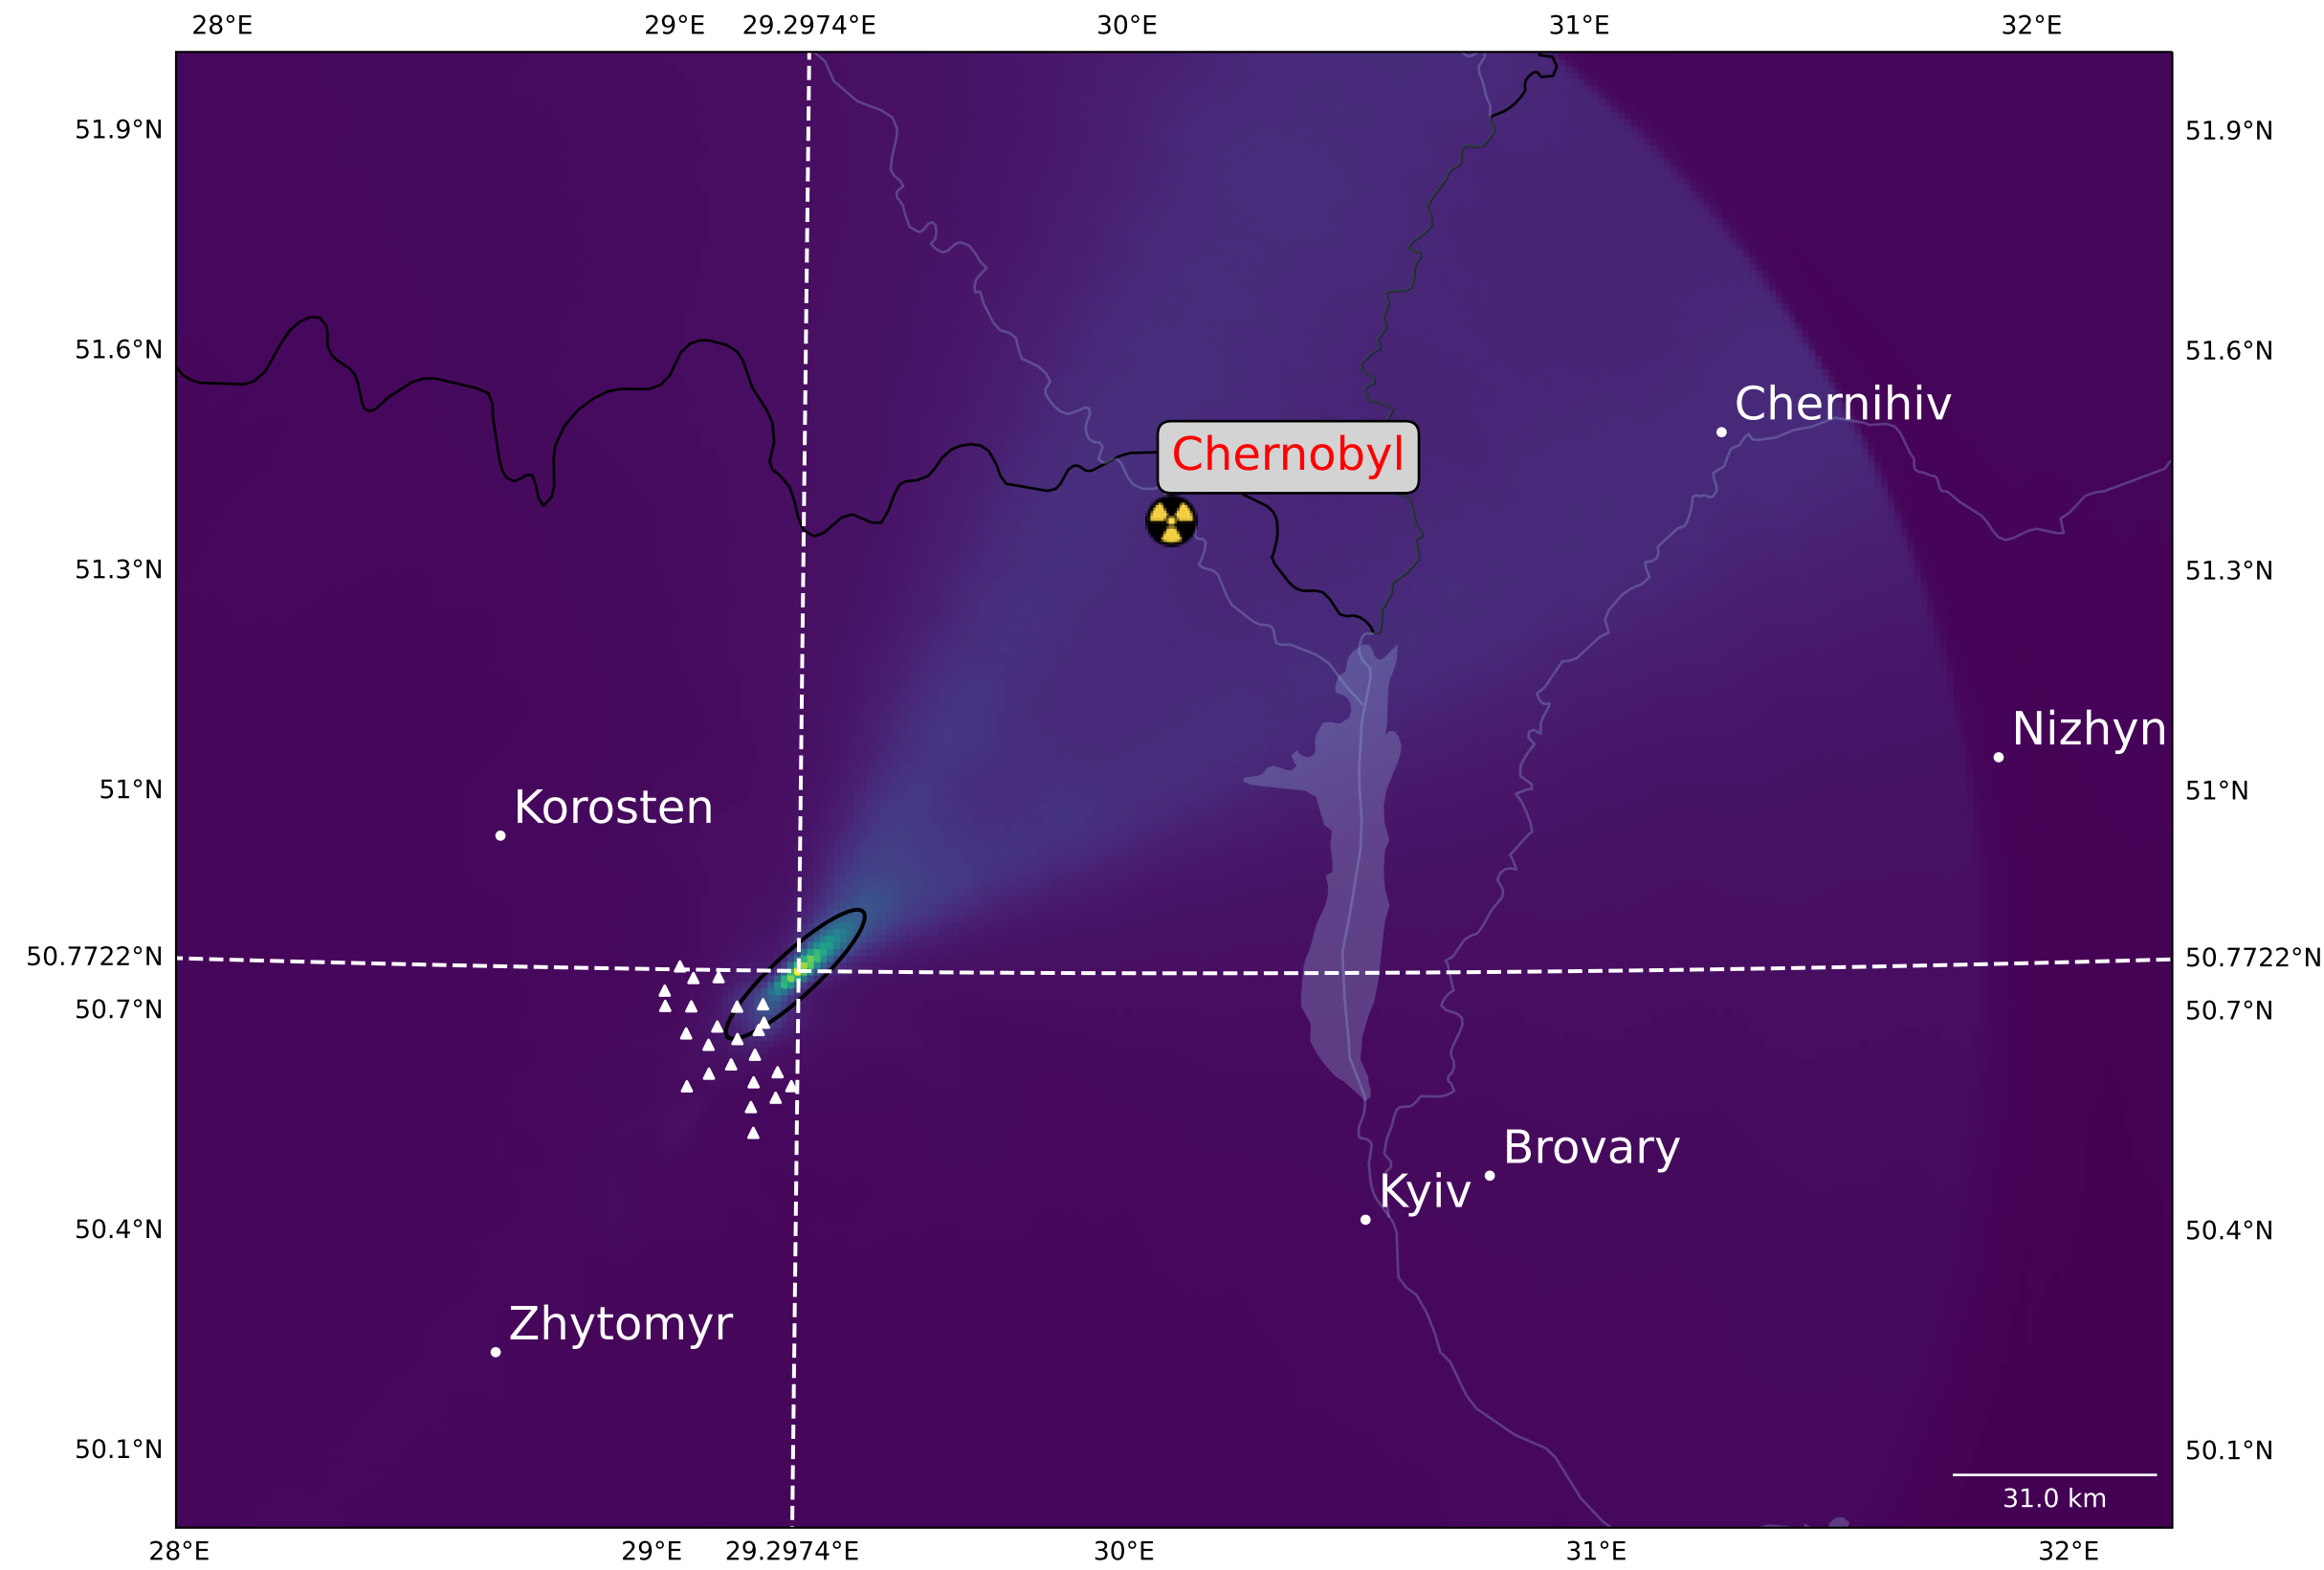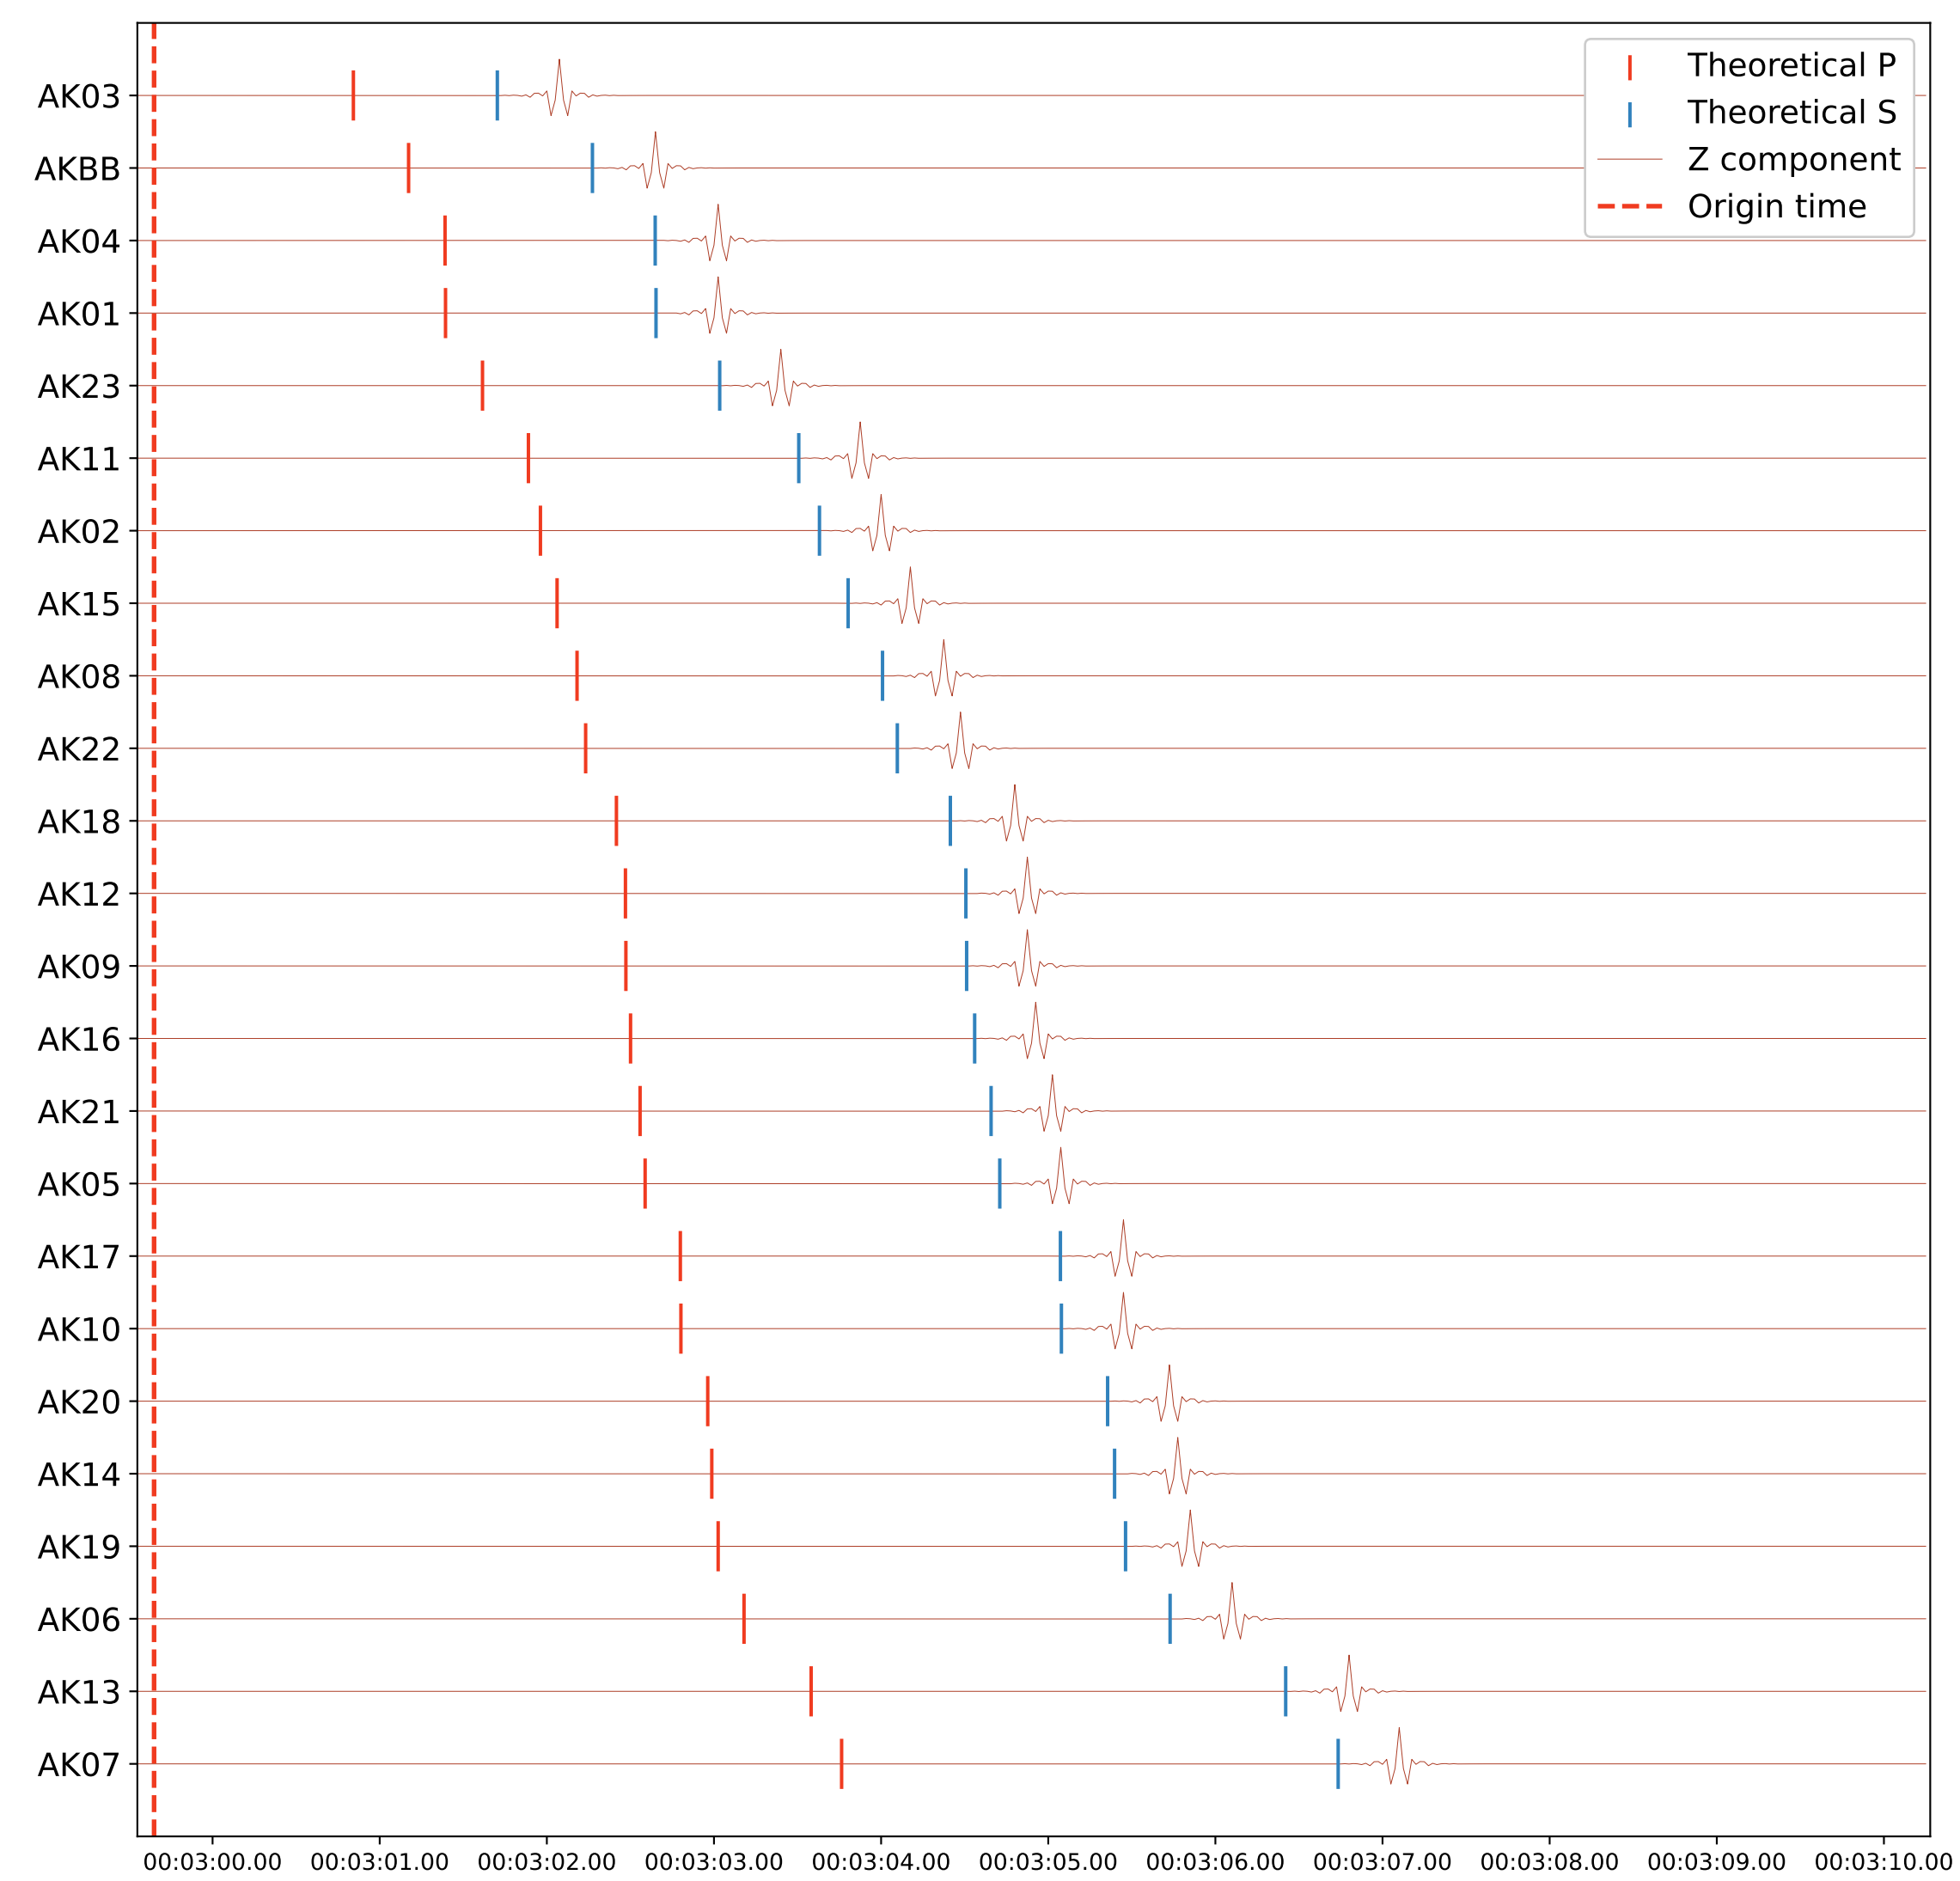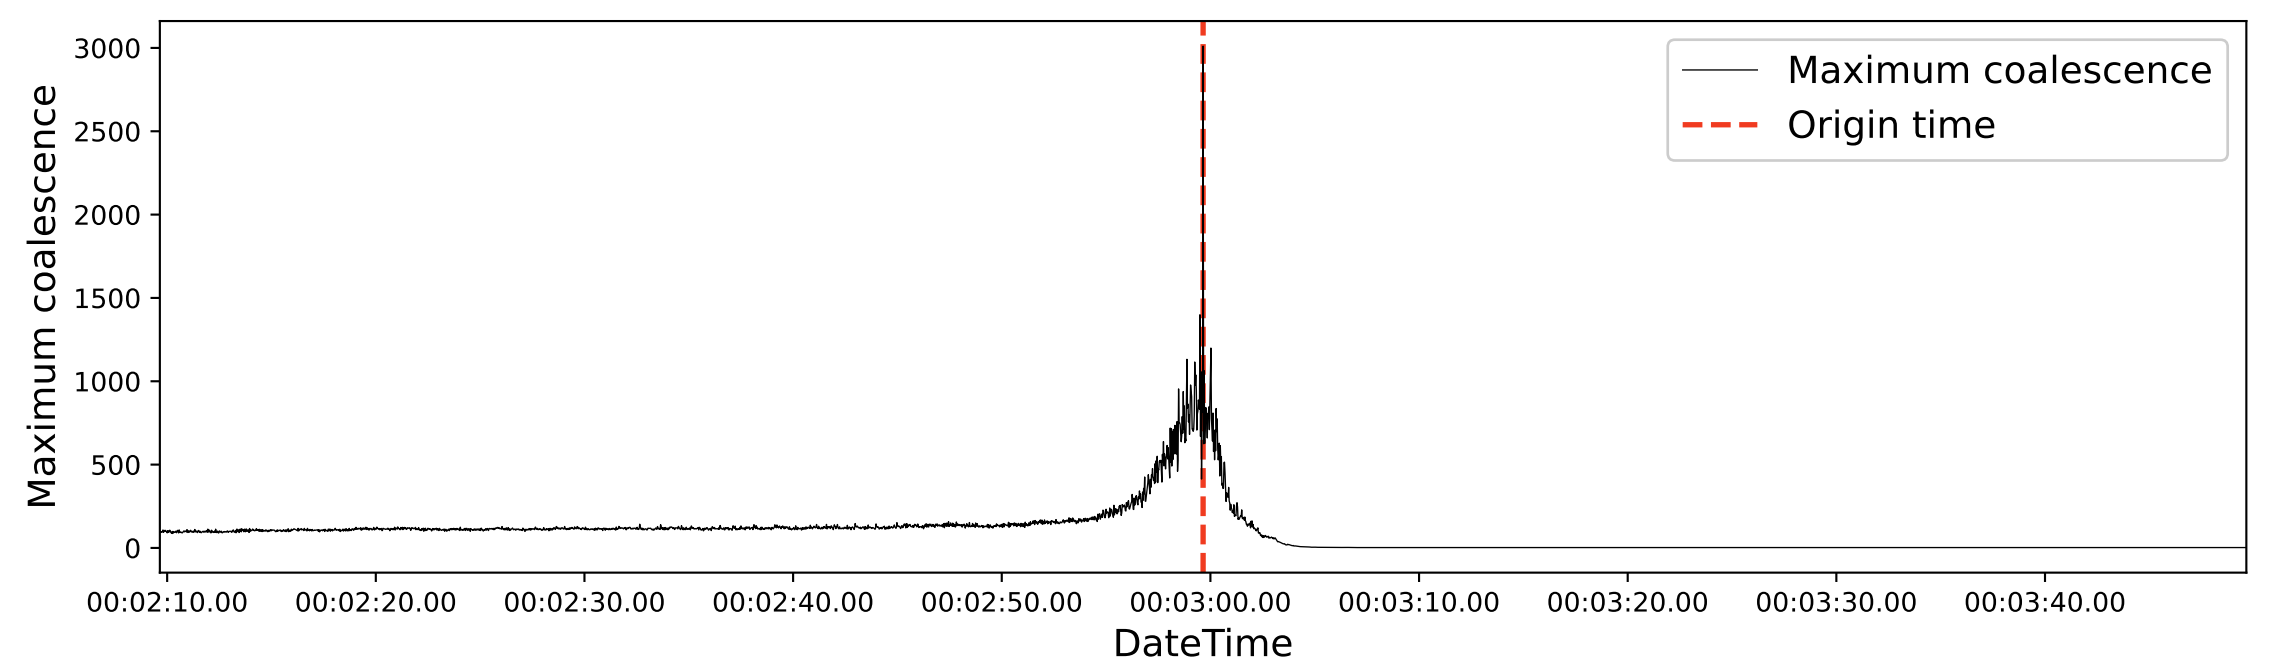

# Malyn point spread function

Origin time: 2022-01-01 00:02:59.650

Hypocentre: 50.7813°N  
29.3114°E

Location error: 1.41 km

Uncertainty ellipse: 2.90 km (semi-major axis)  
1.60 km (semi-minor axis)

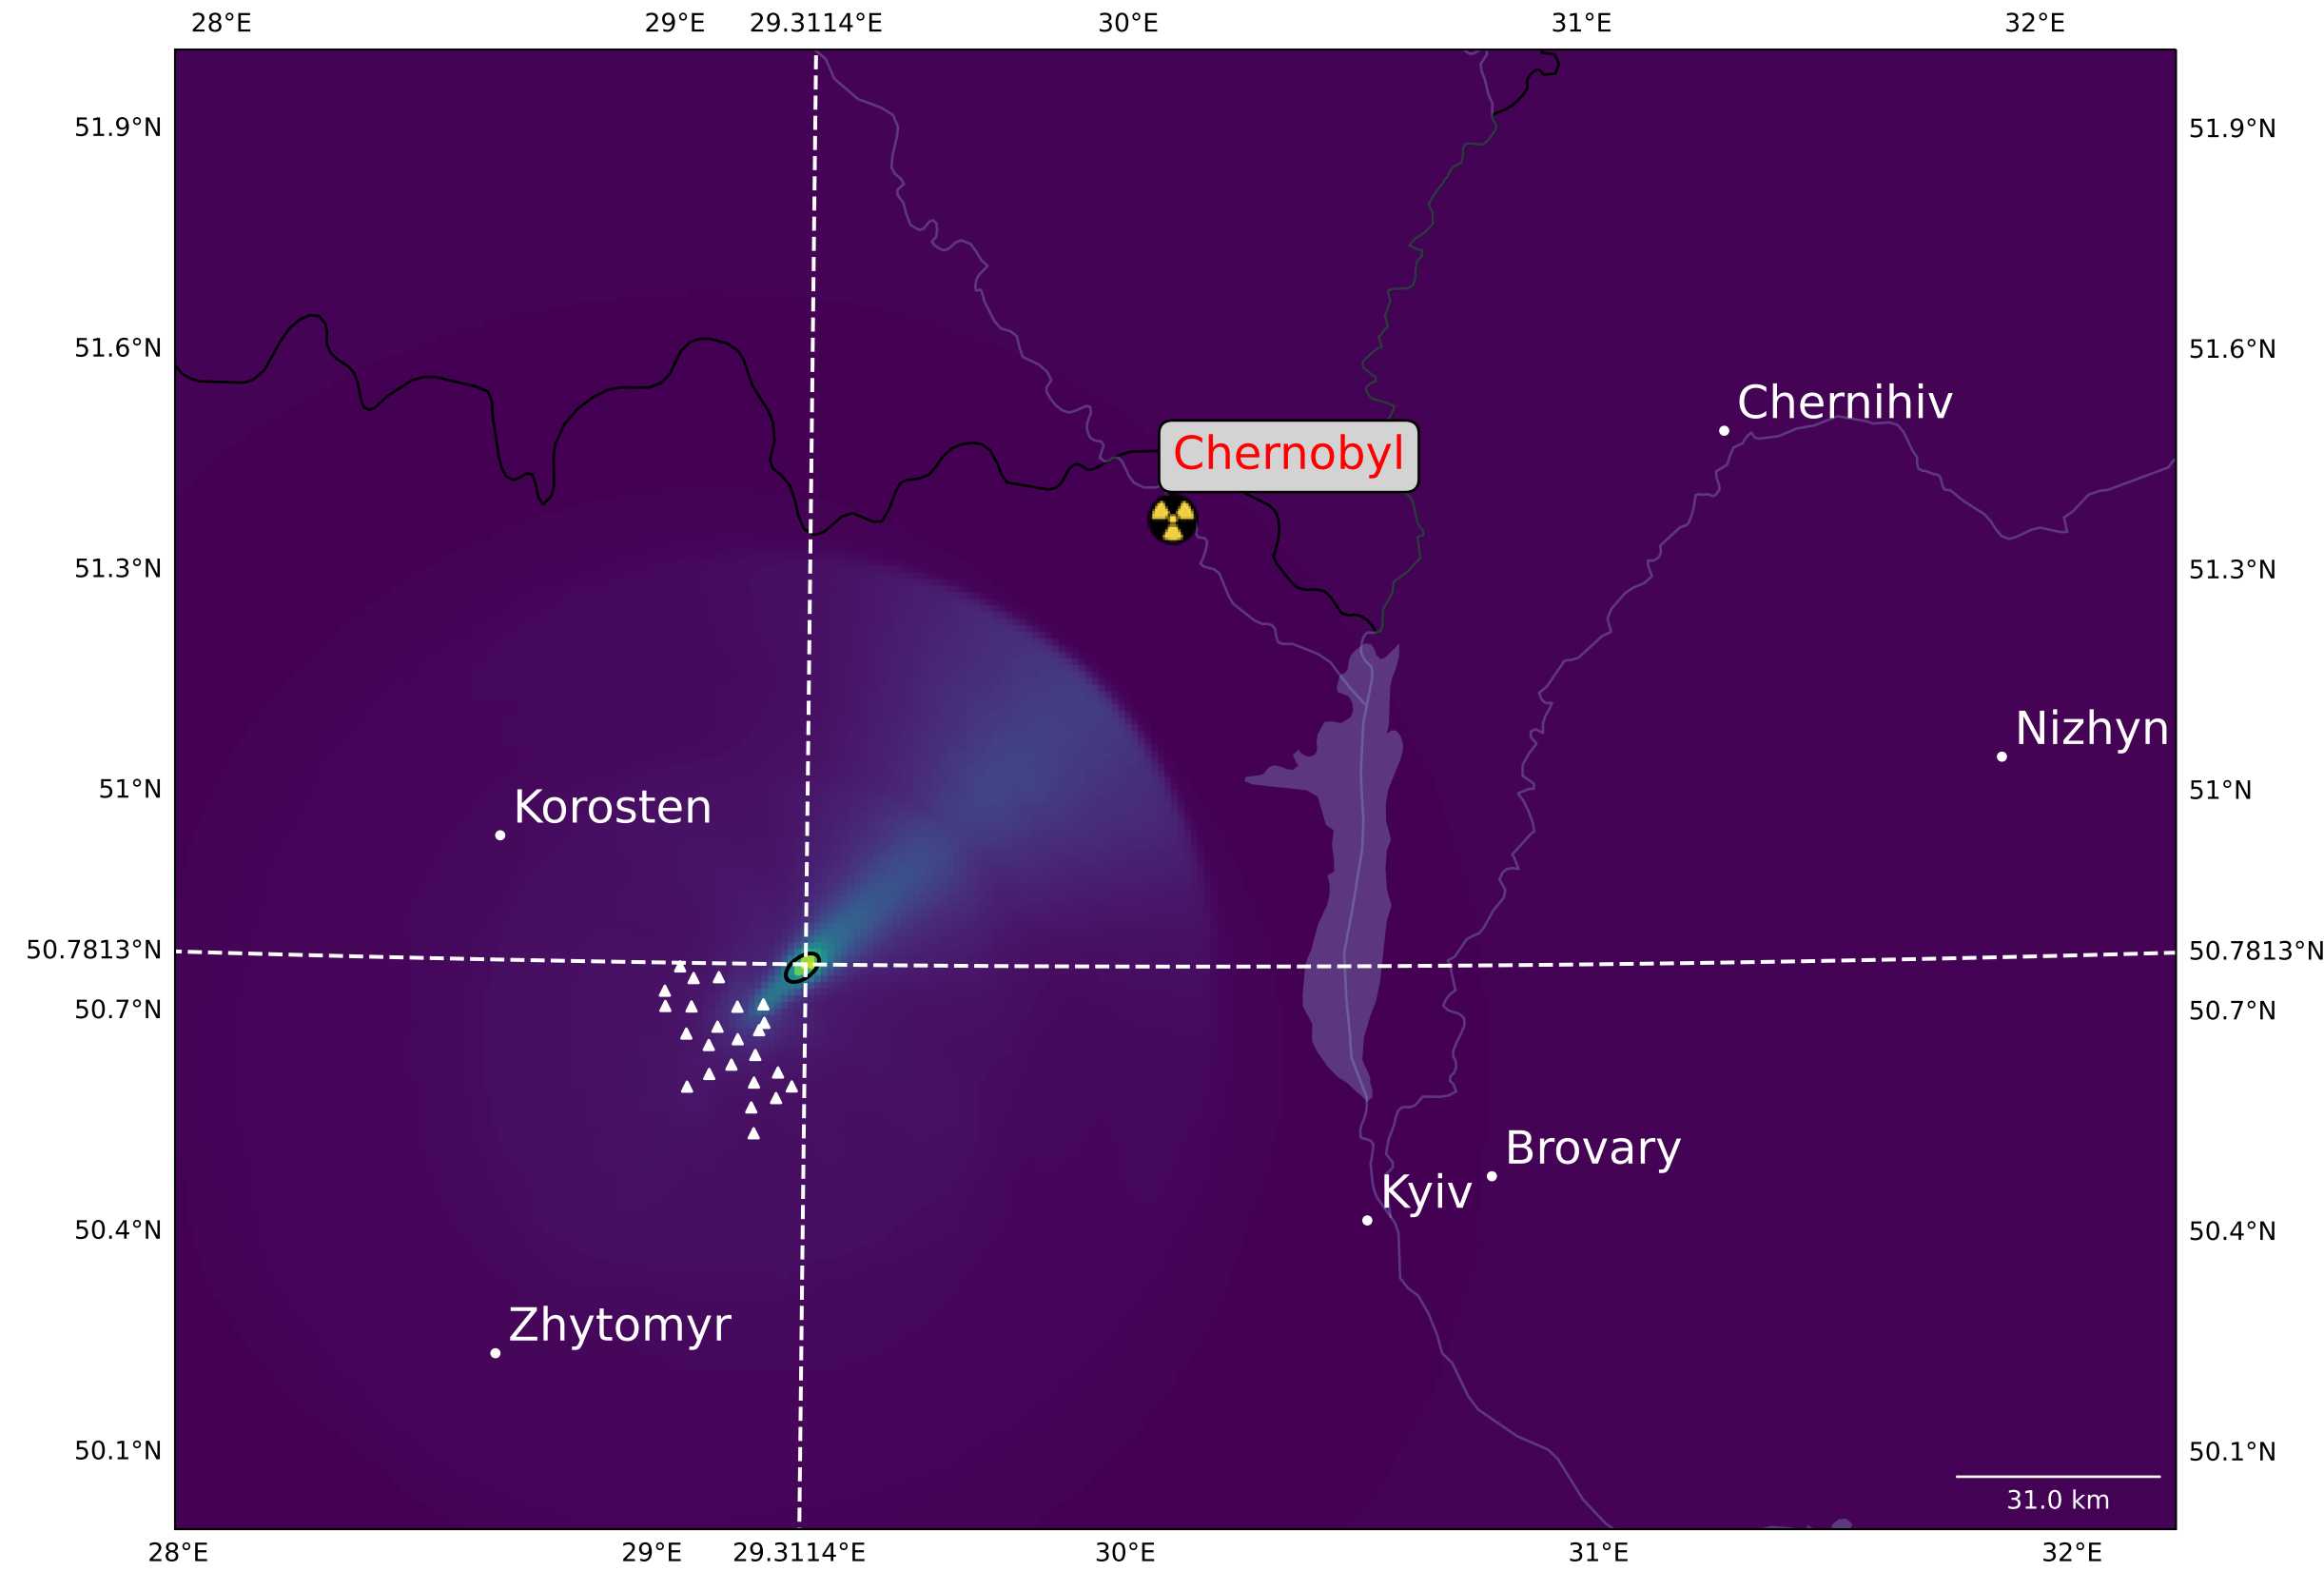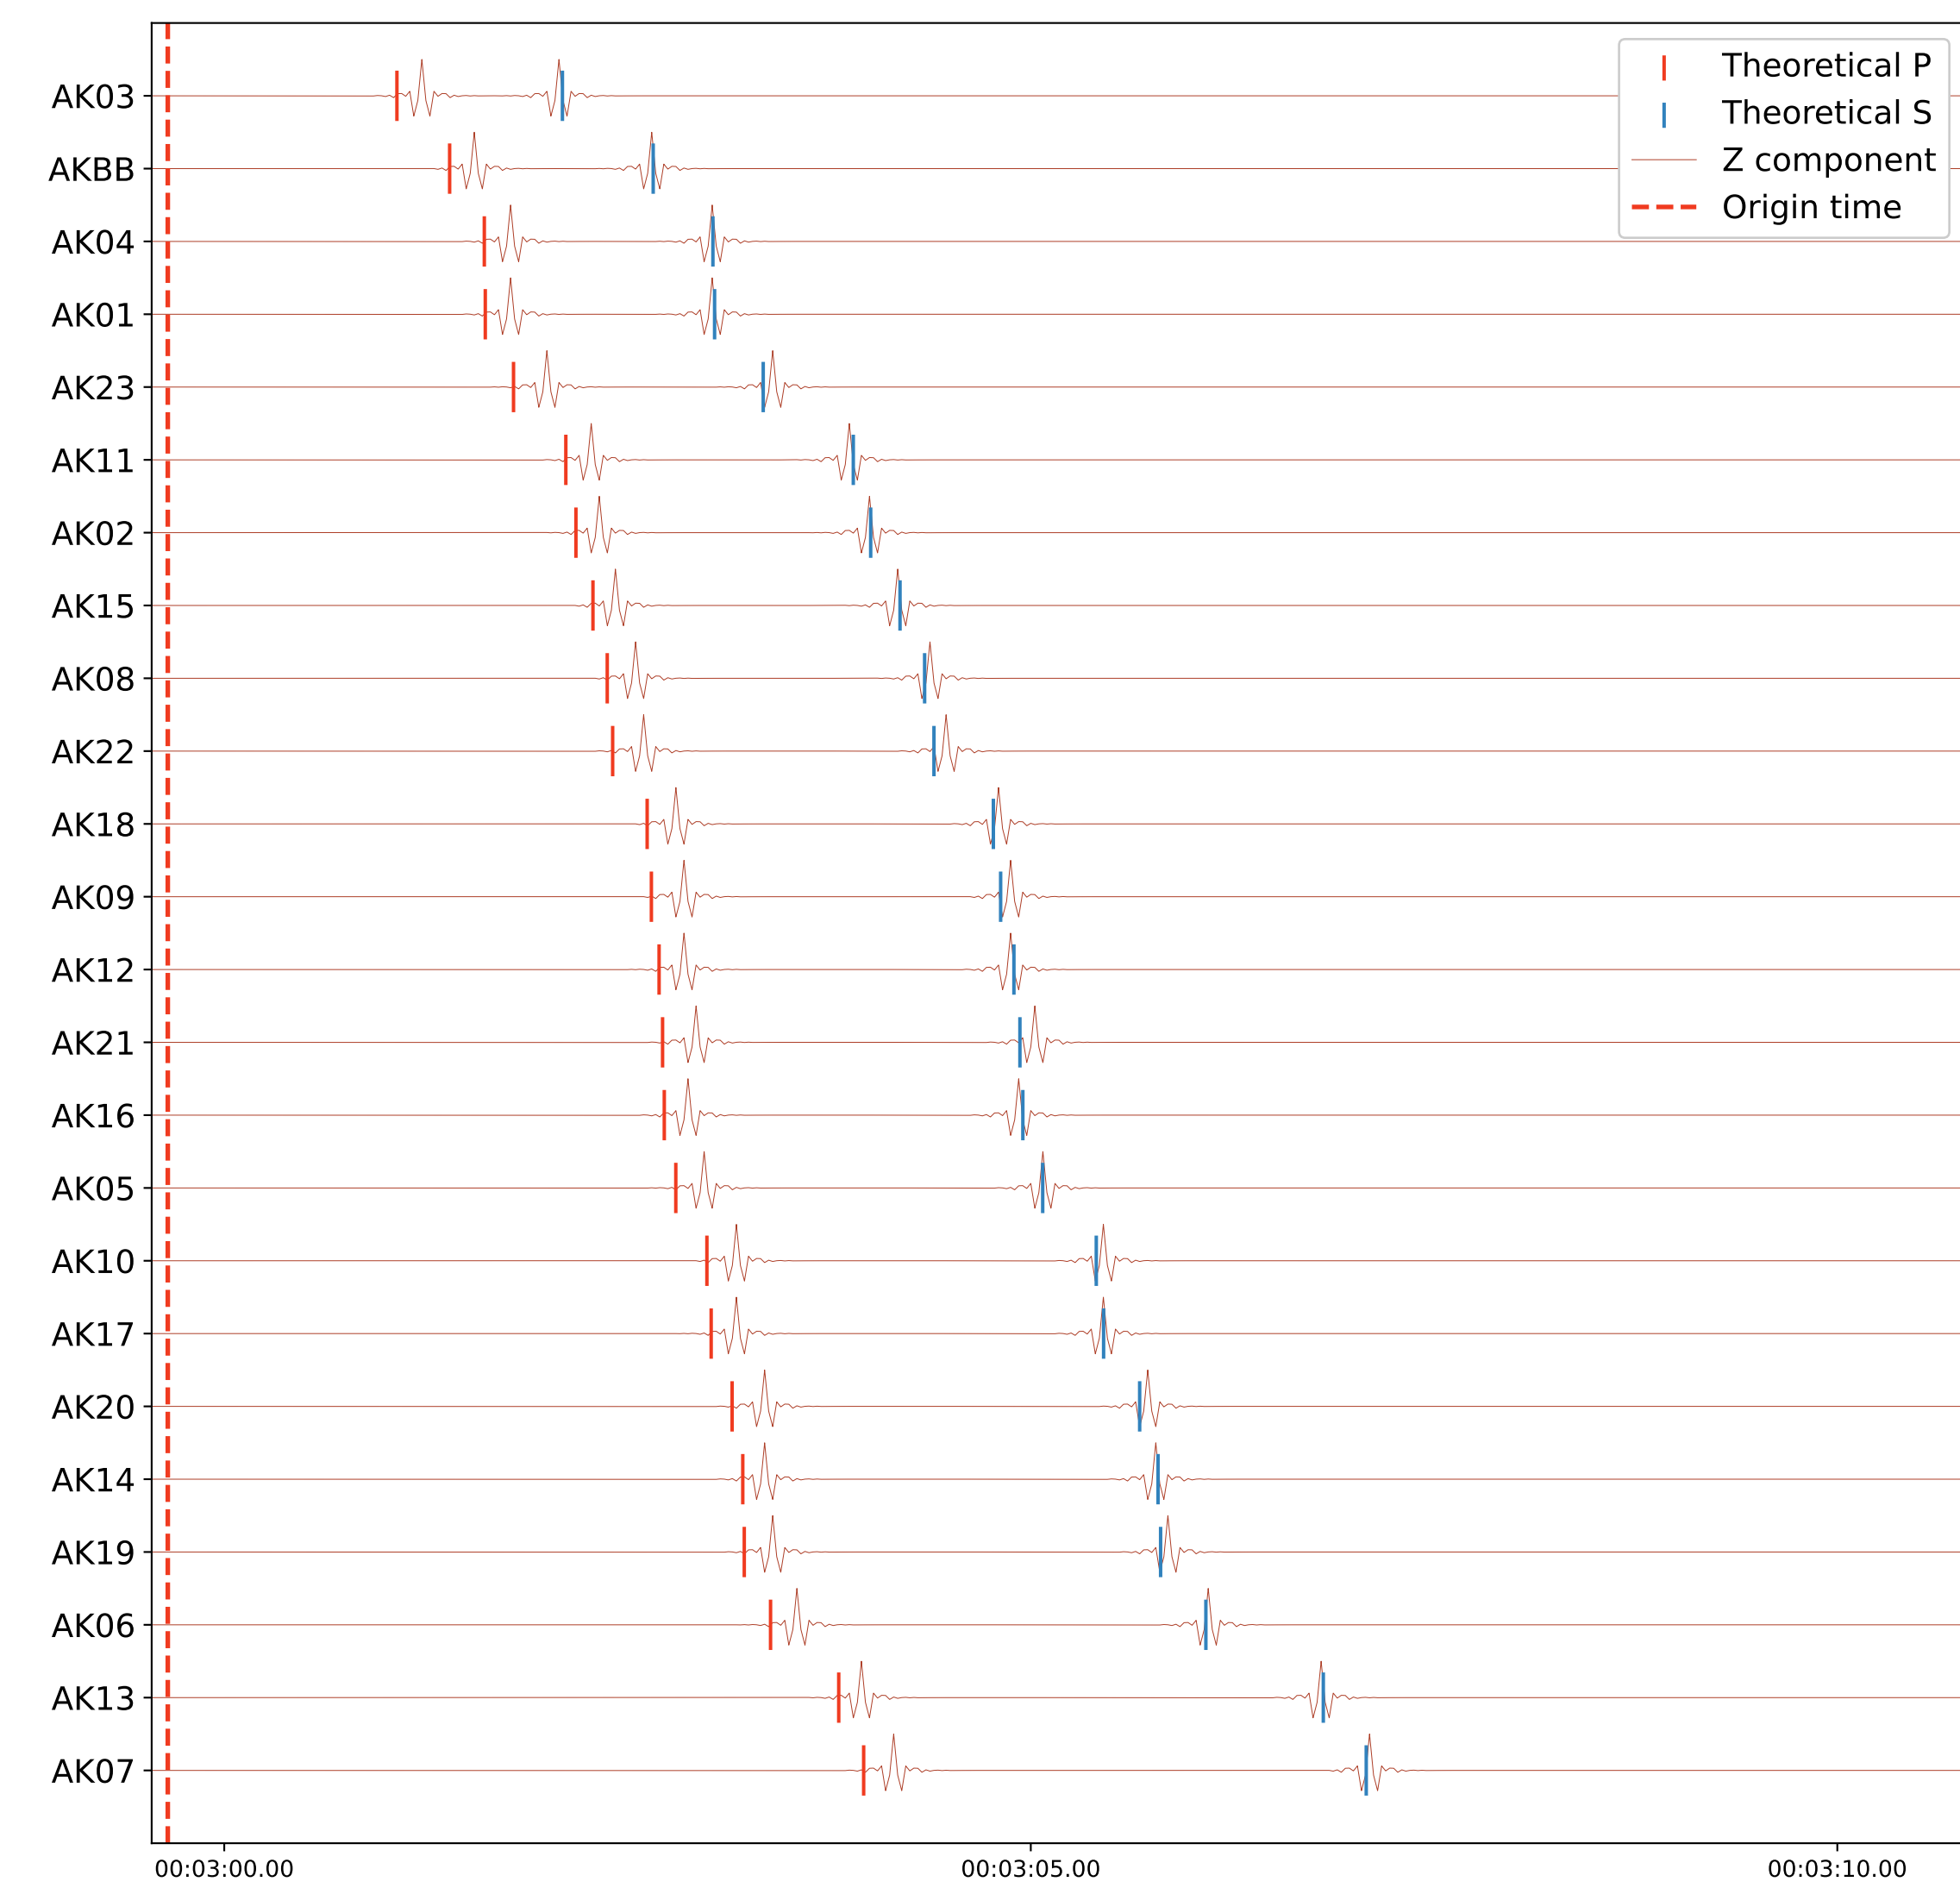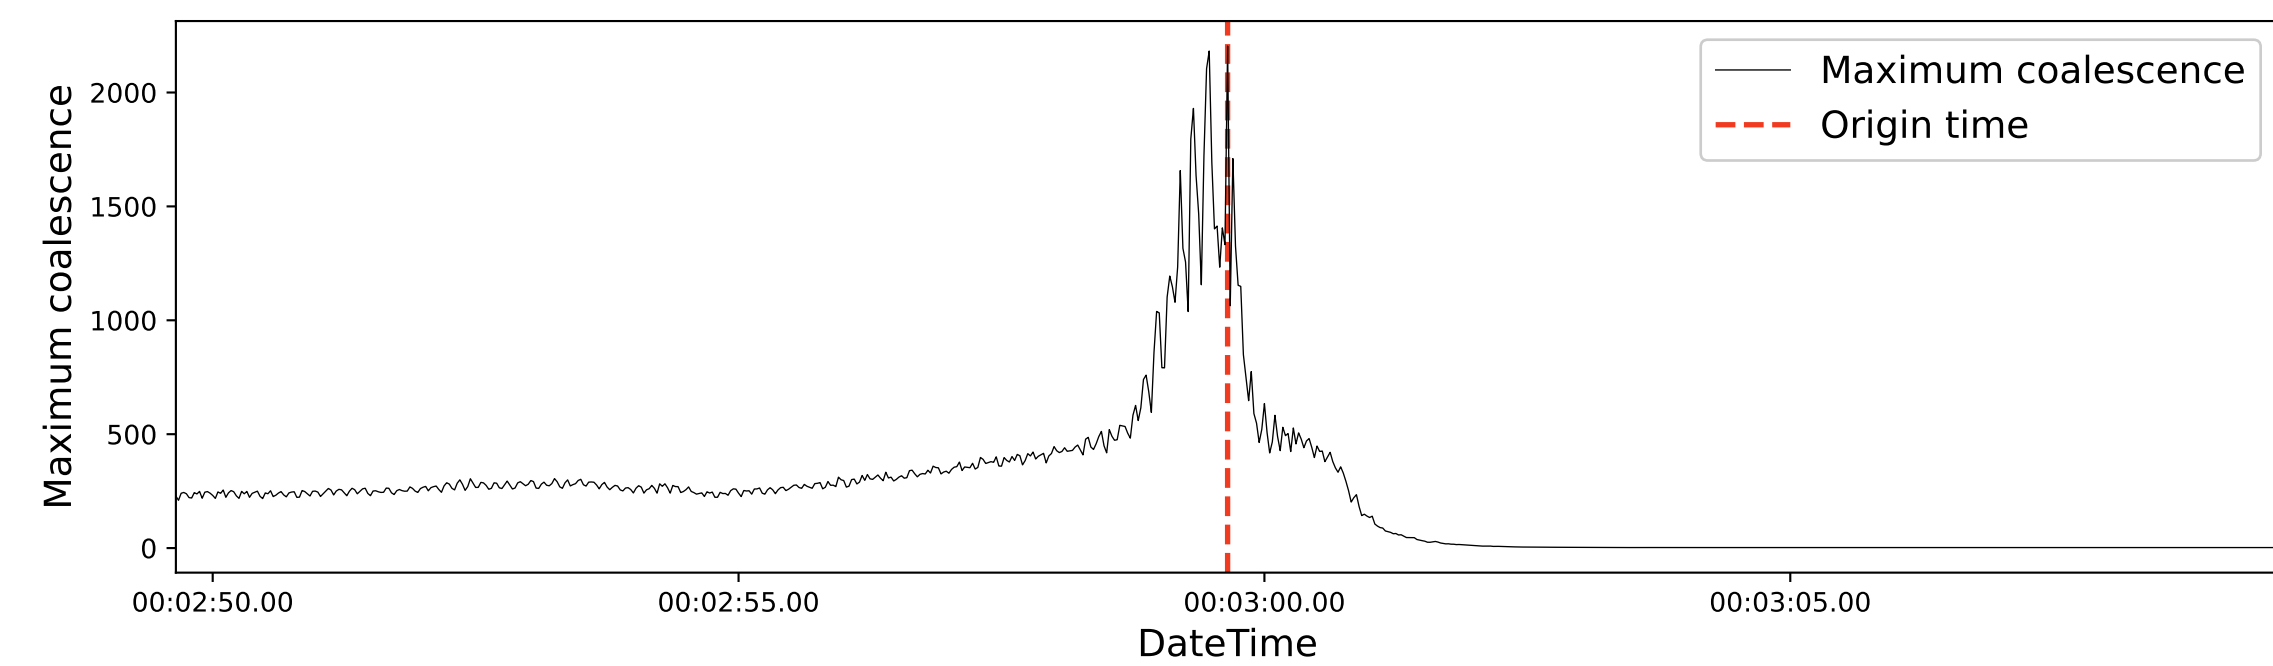

# Zhytomyr point spread function

Origin time: 2022-01-01 00:02:59.650

Hypocentre: 50.2443°N  
28.662°E

Location error: 0.00 km

Uncertainty ellipse: 41.00 km (semi-major axis)  
13.00 km (semi-minor axis)

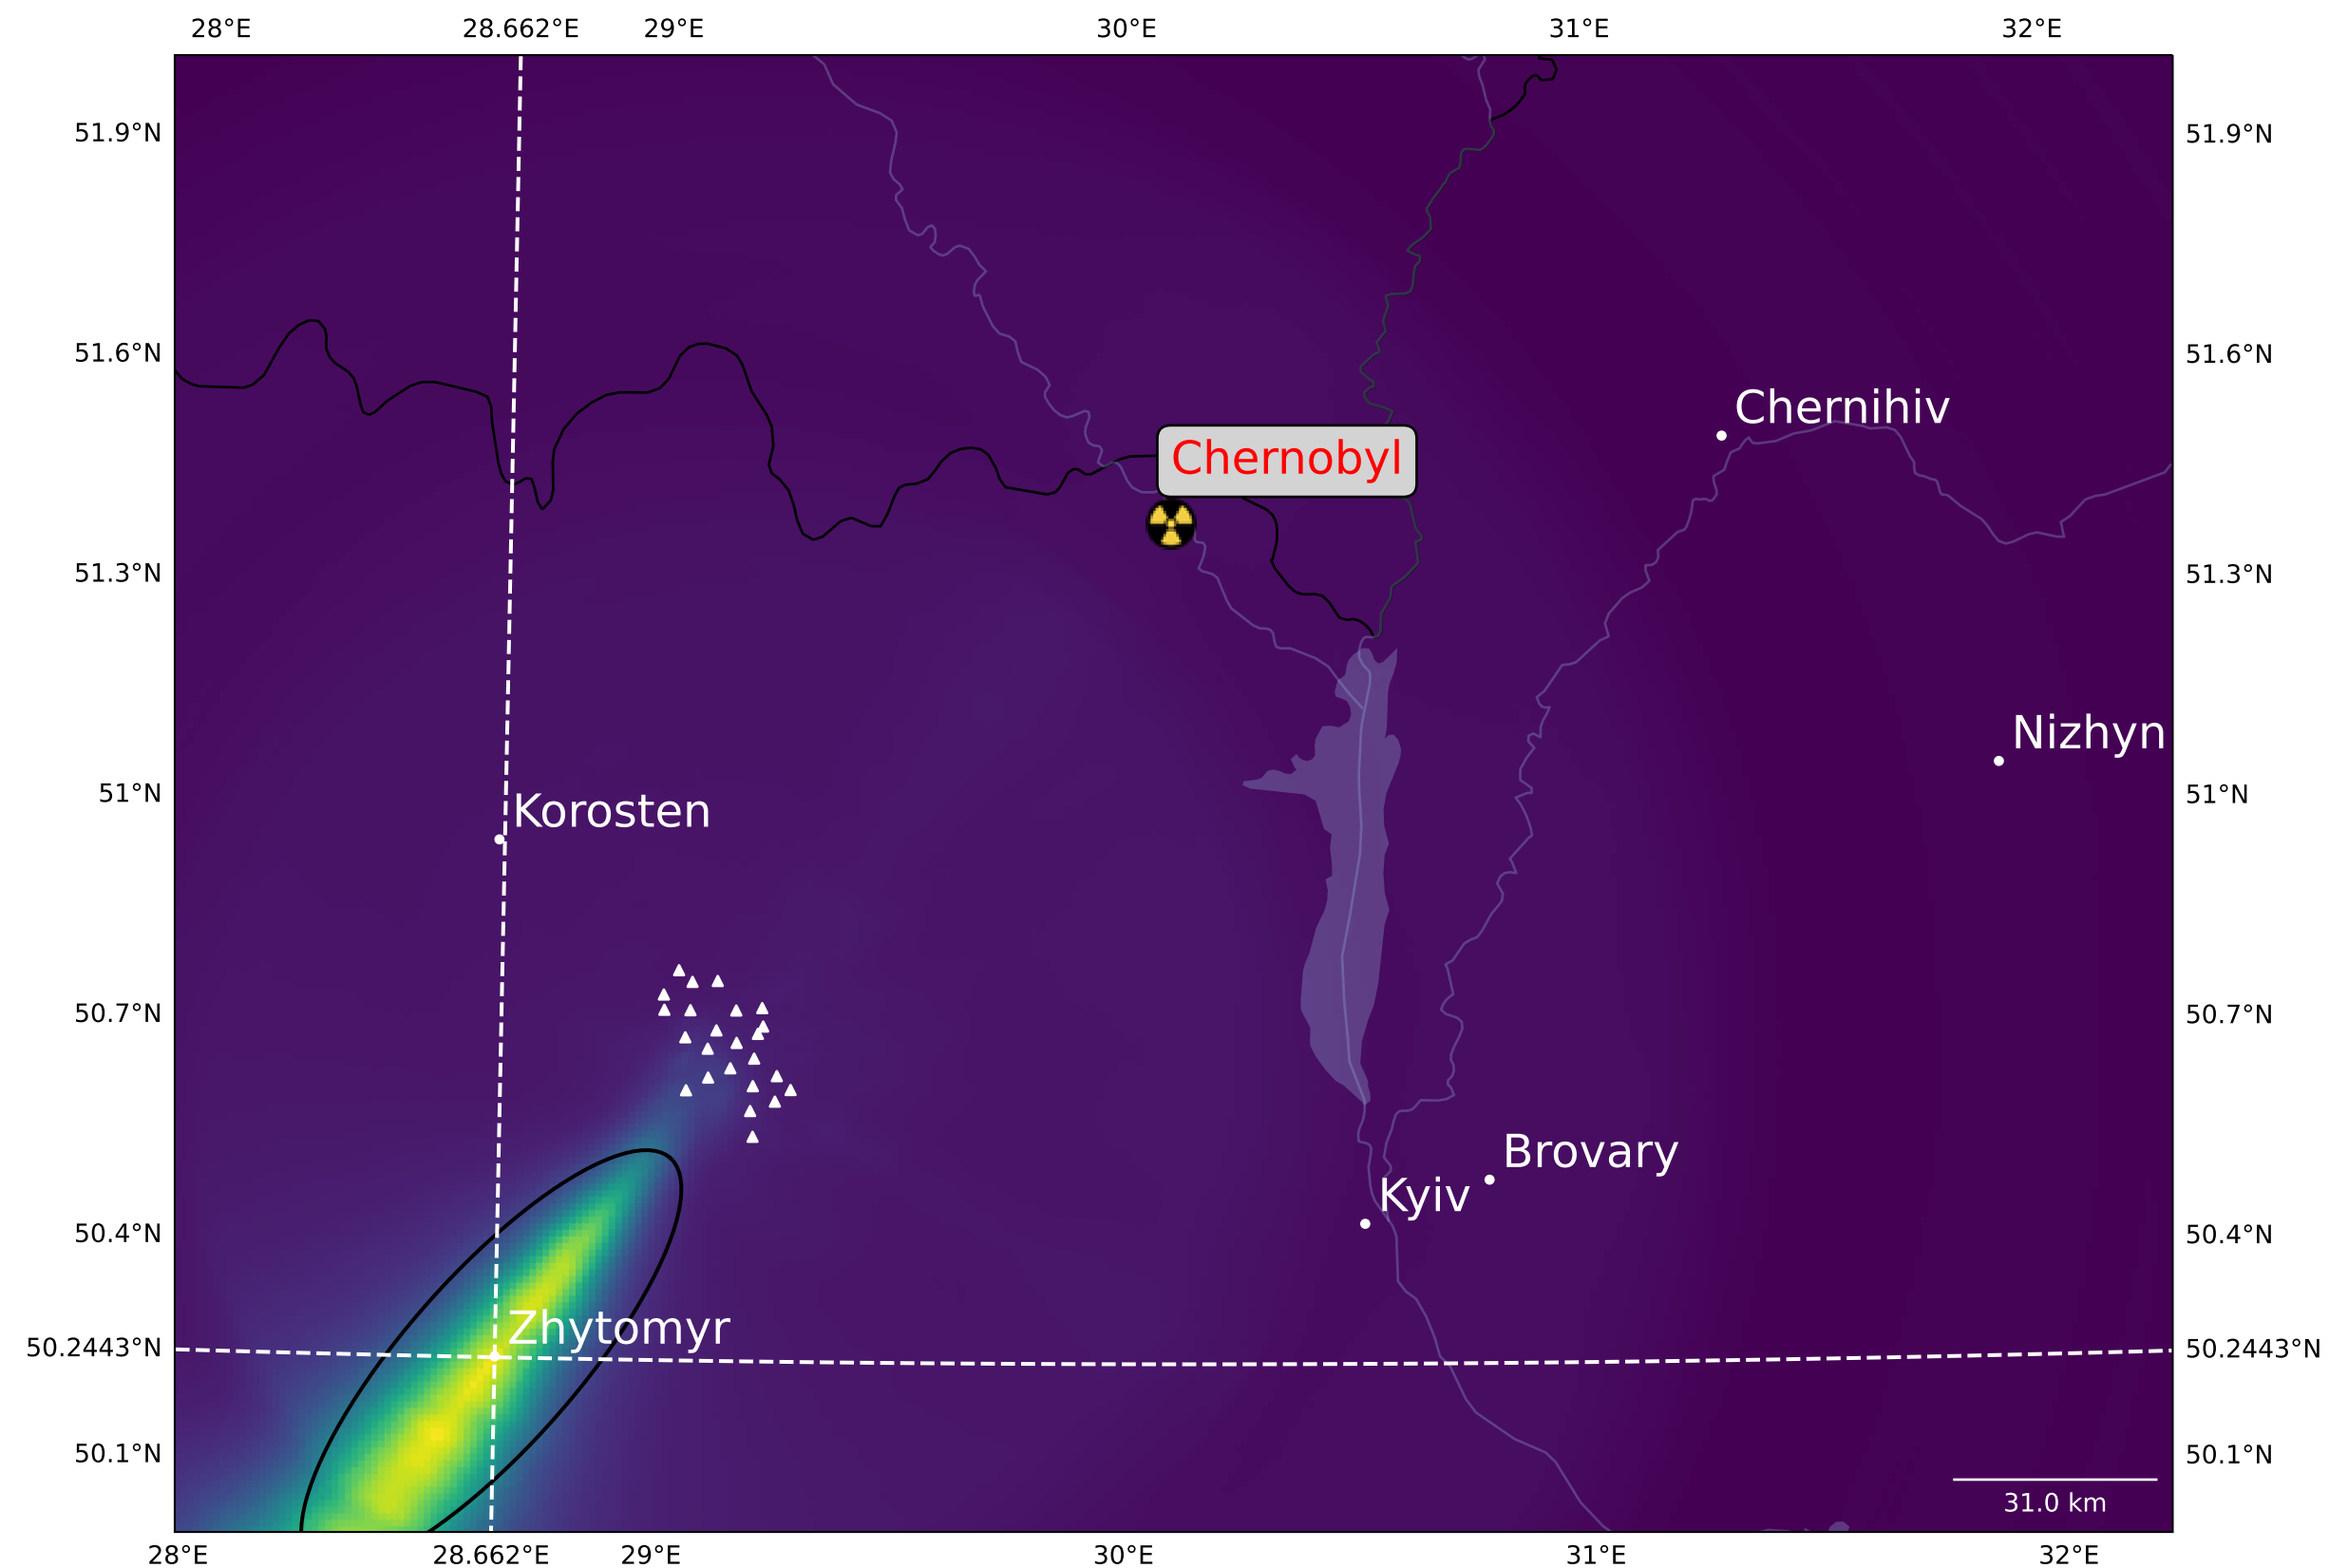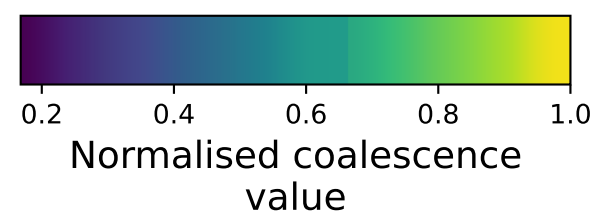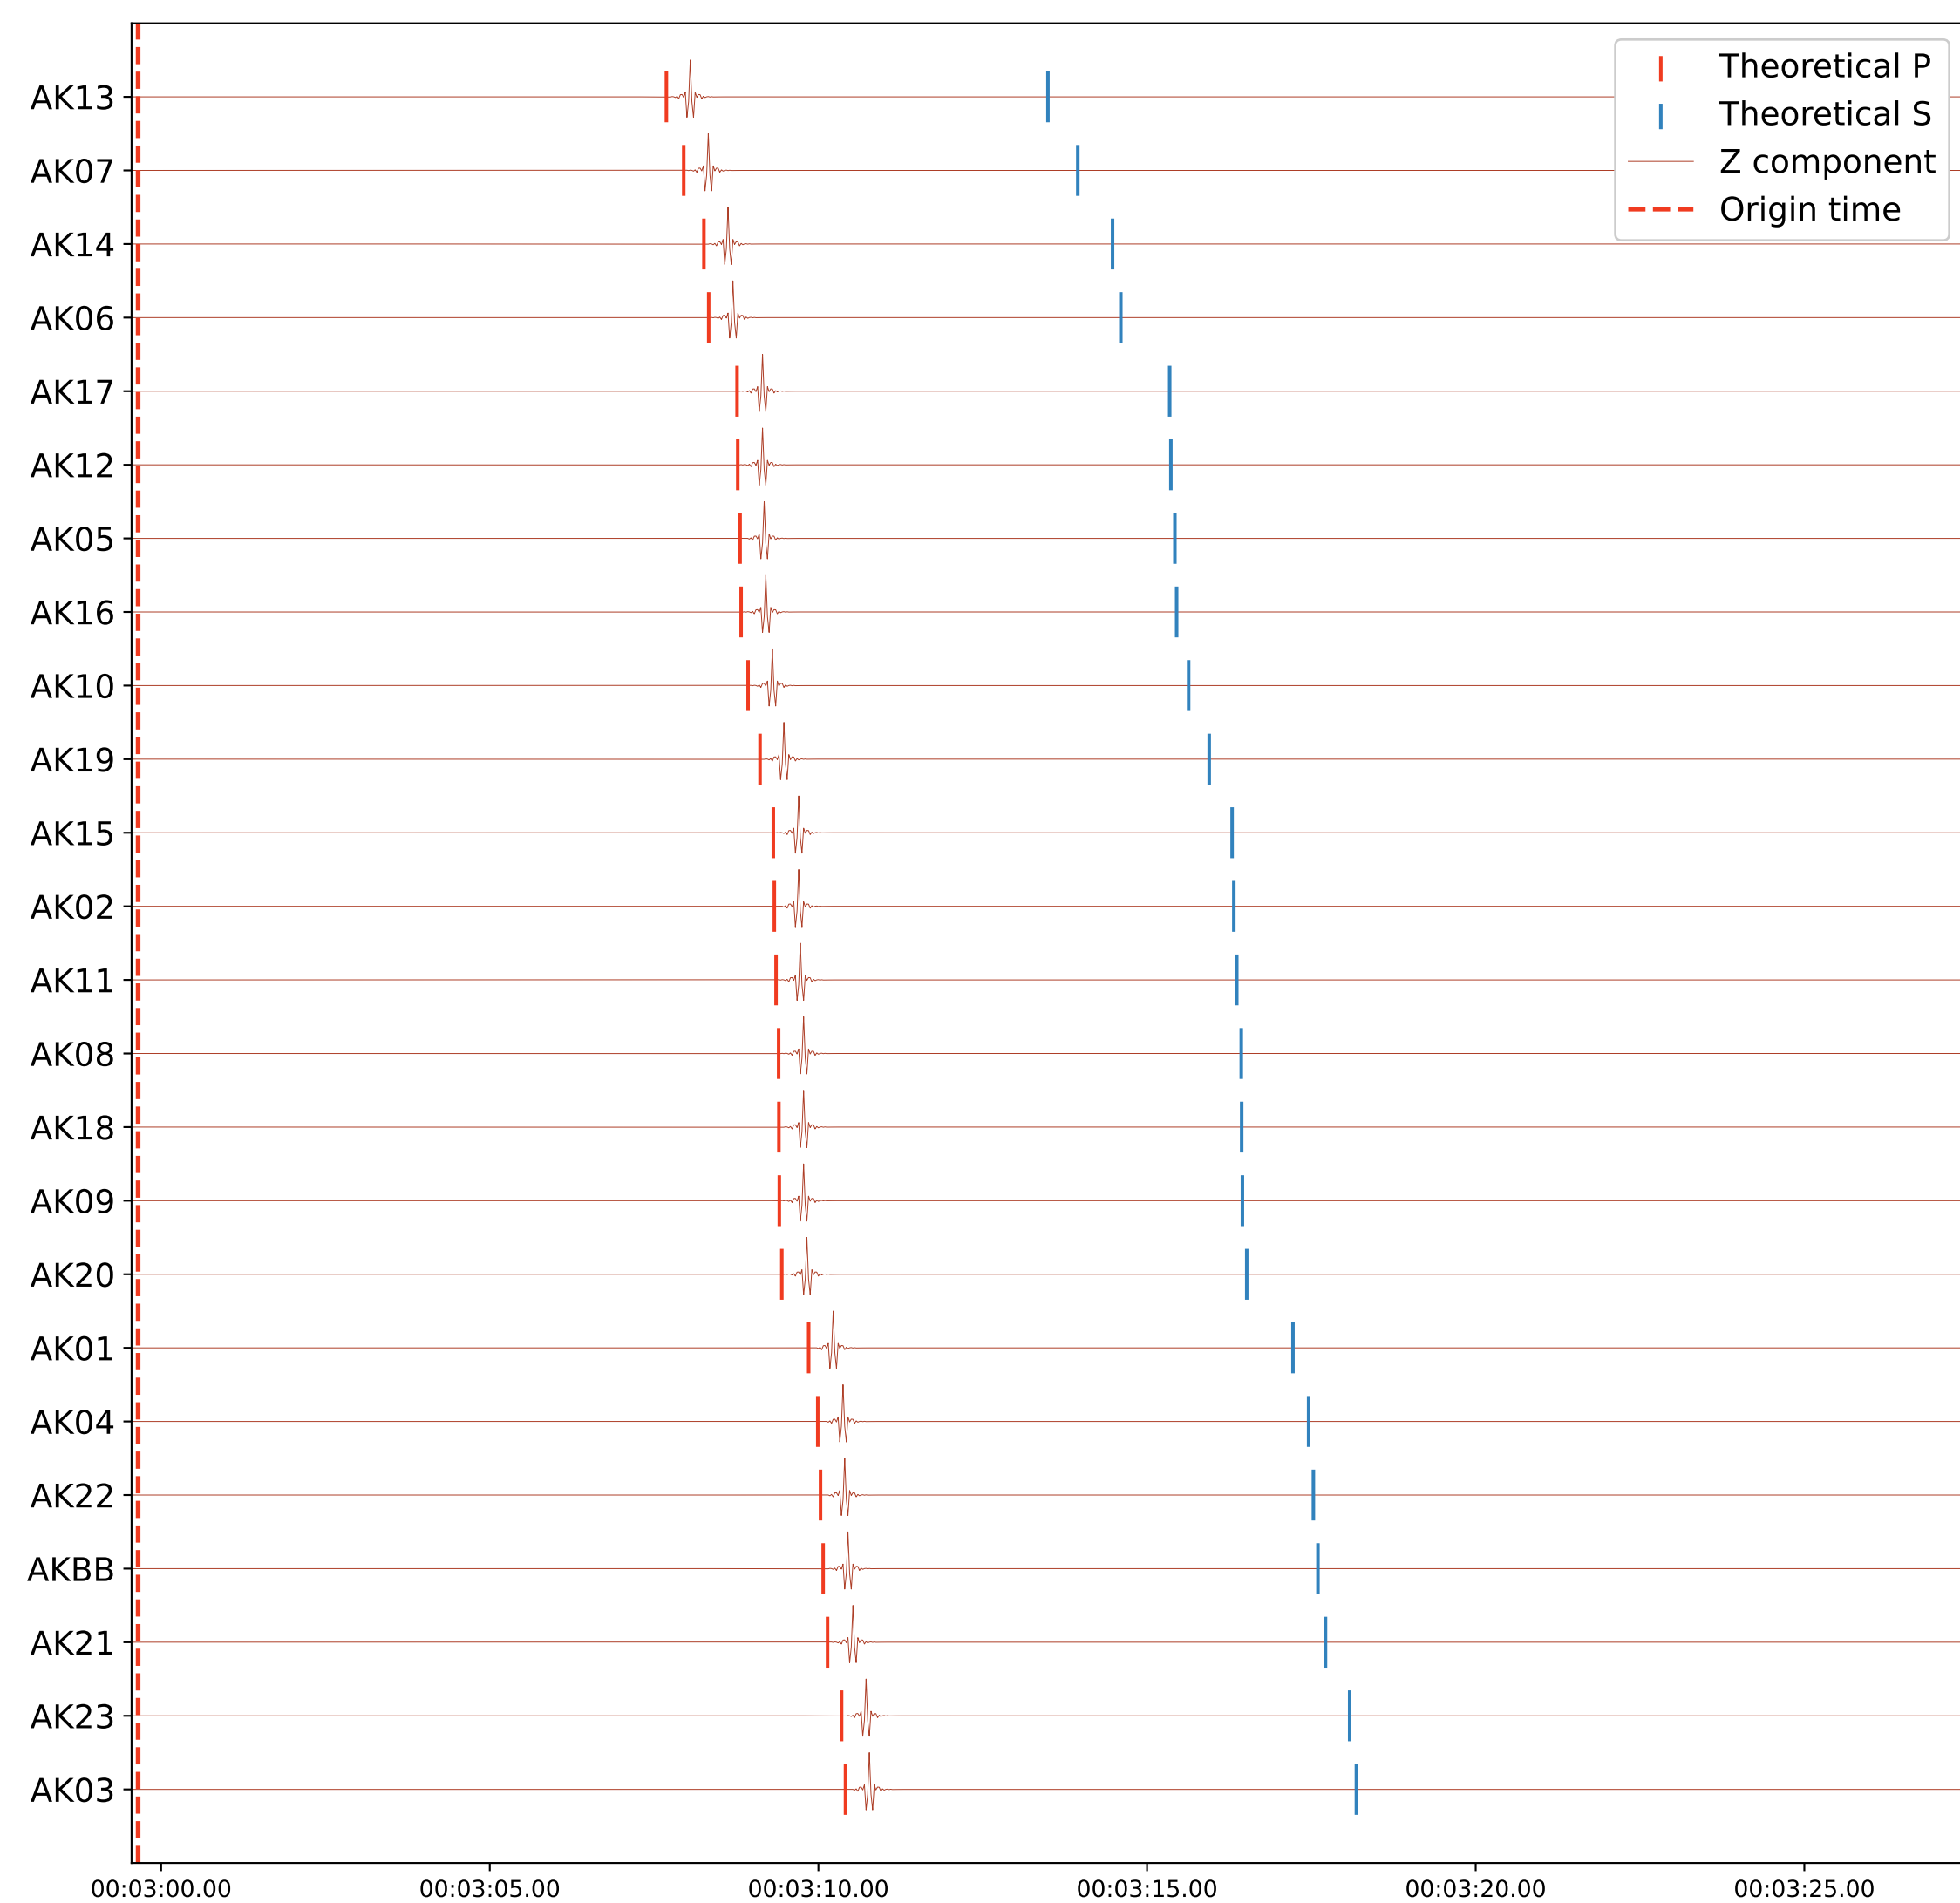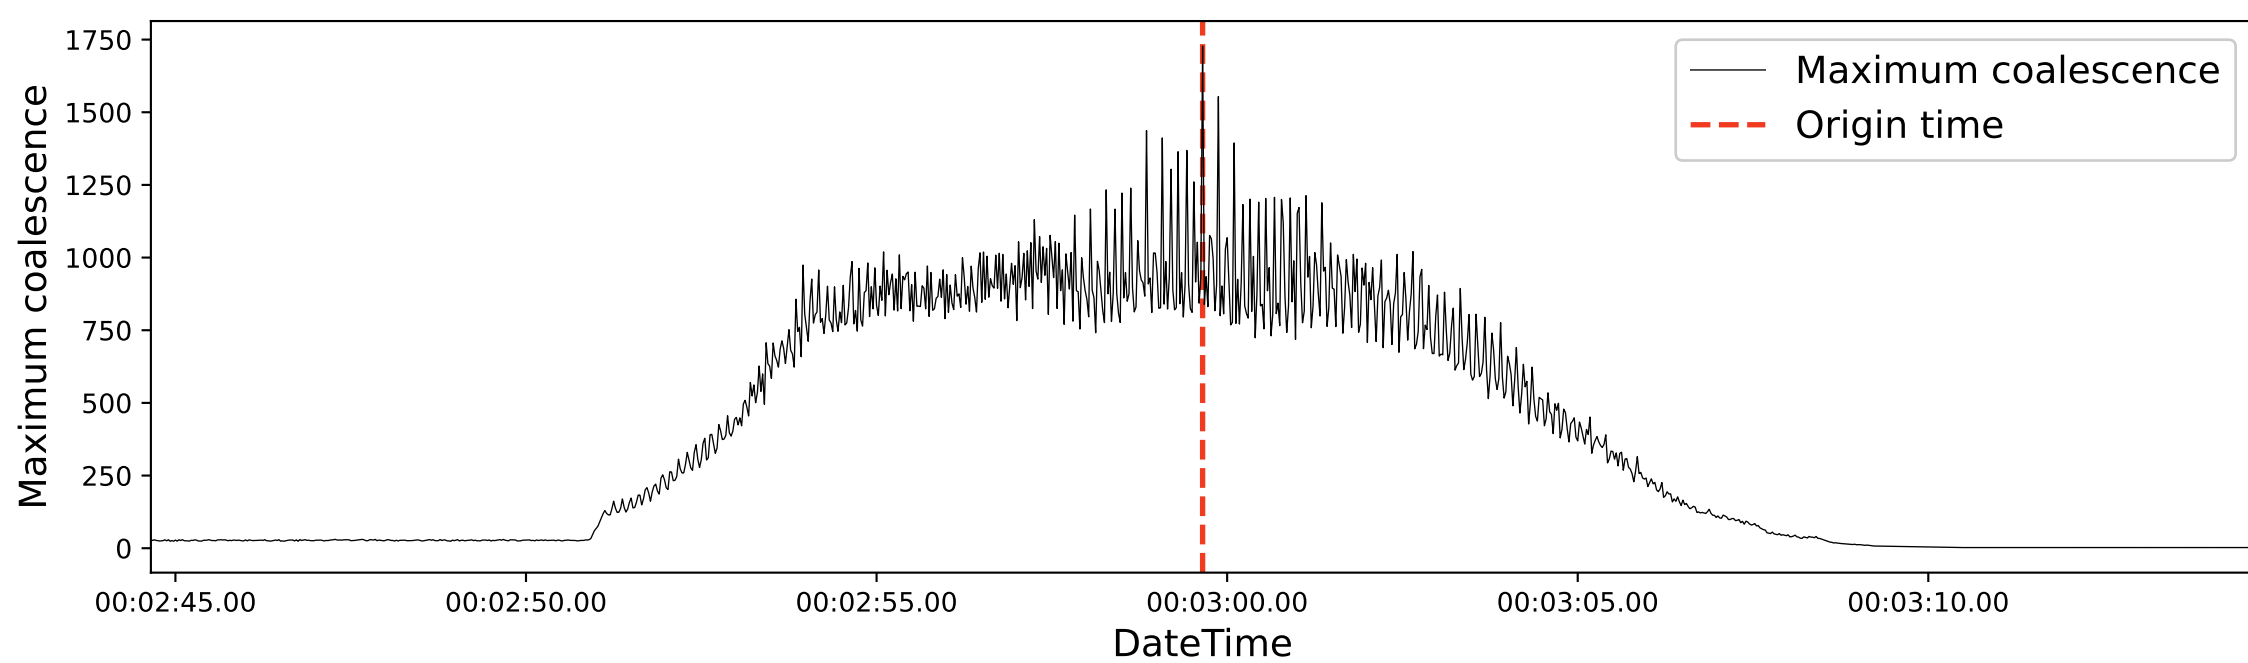

# Zhytomyr point spread function

Origin time: 2022-01-01 00:02:59.650

Hypocentre: 50.2443°N  
28.662°E

Location error: 0.00 km

Uncertainty ellipse: 35.00 km (semi-major axis)  
6.70 km (semi-minor axis)

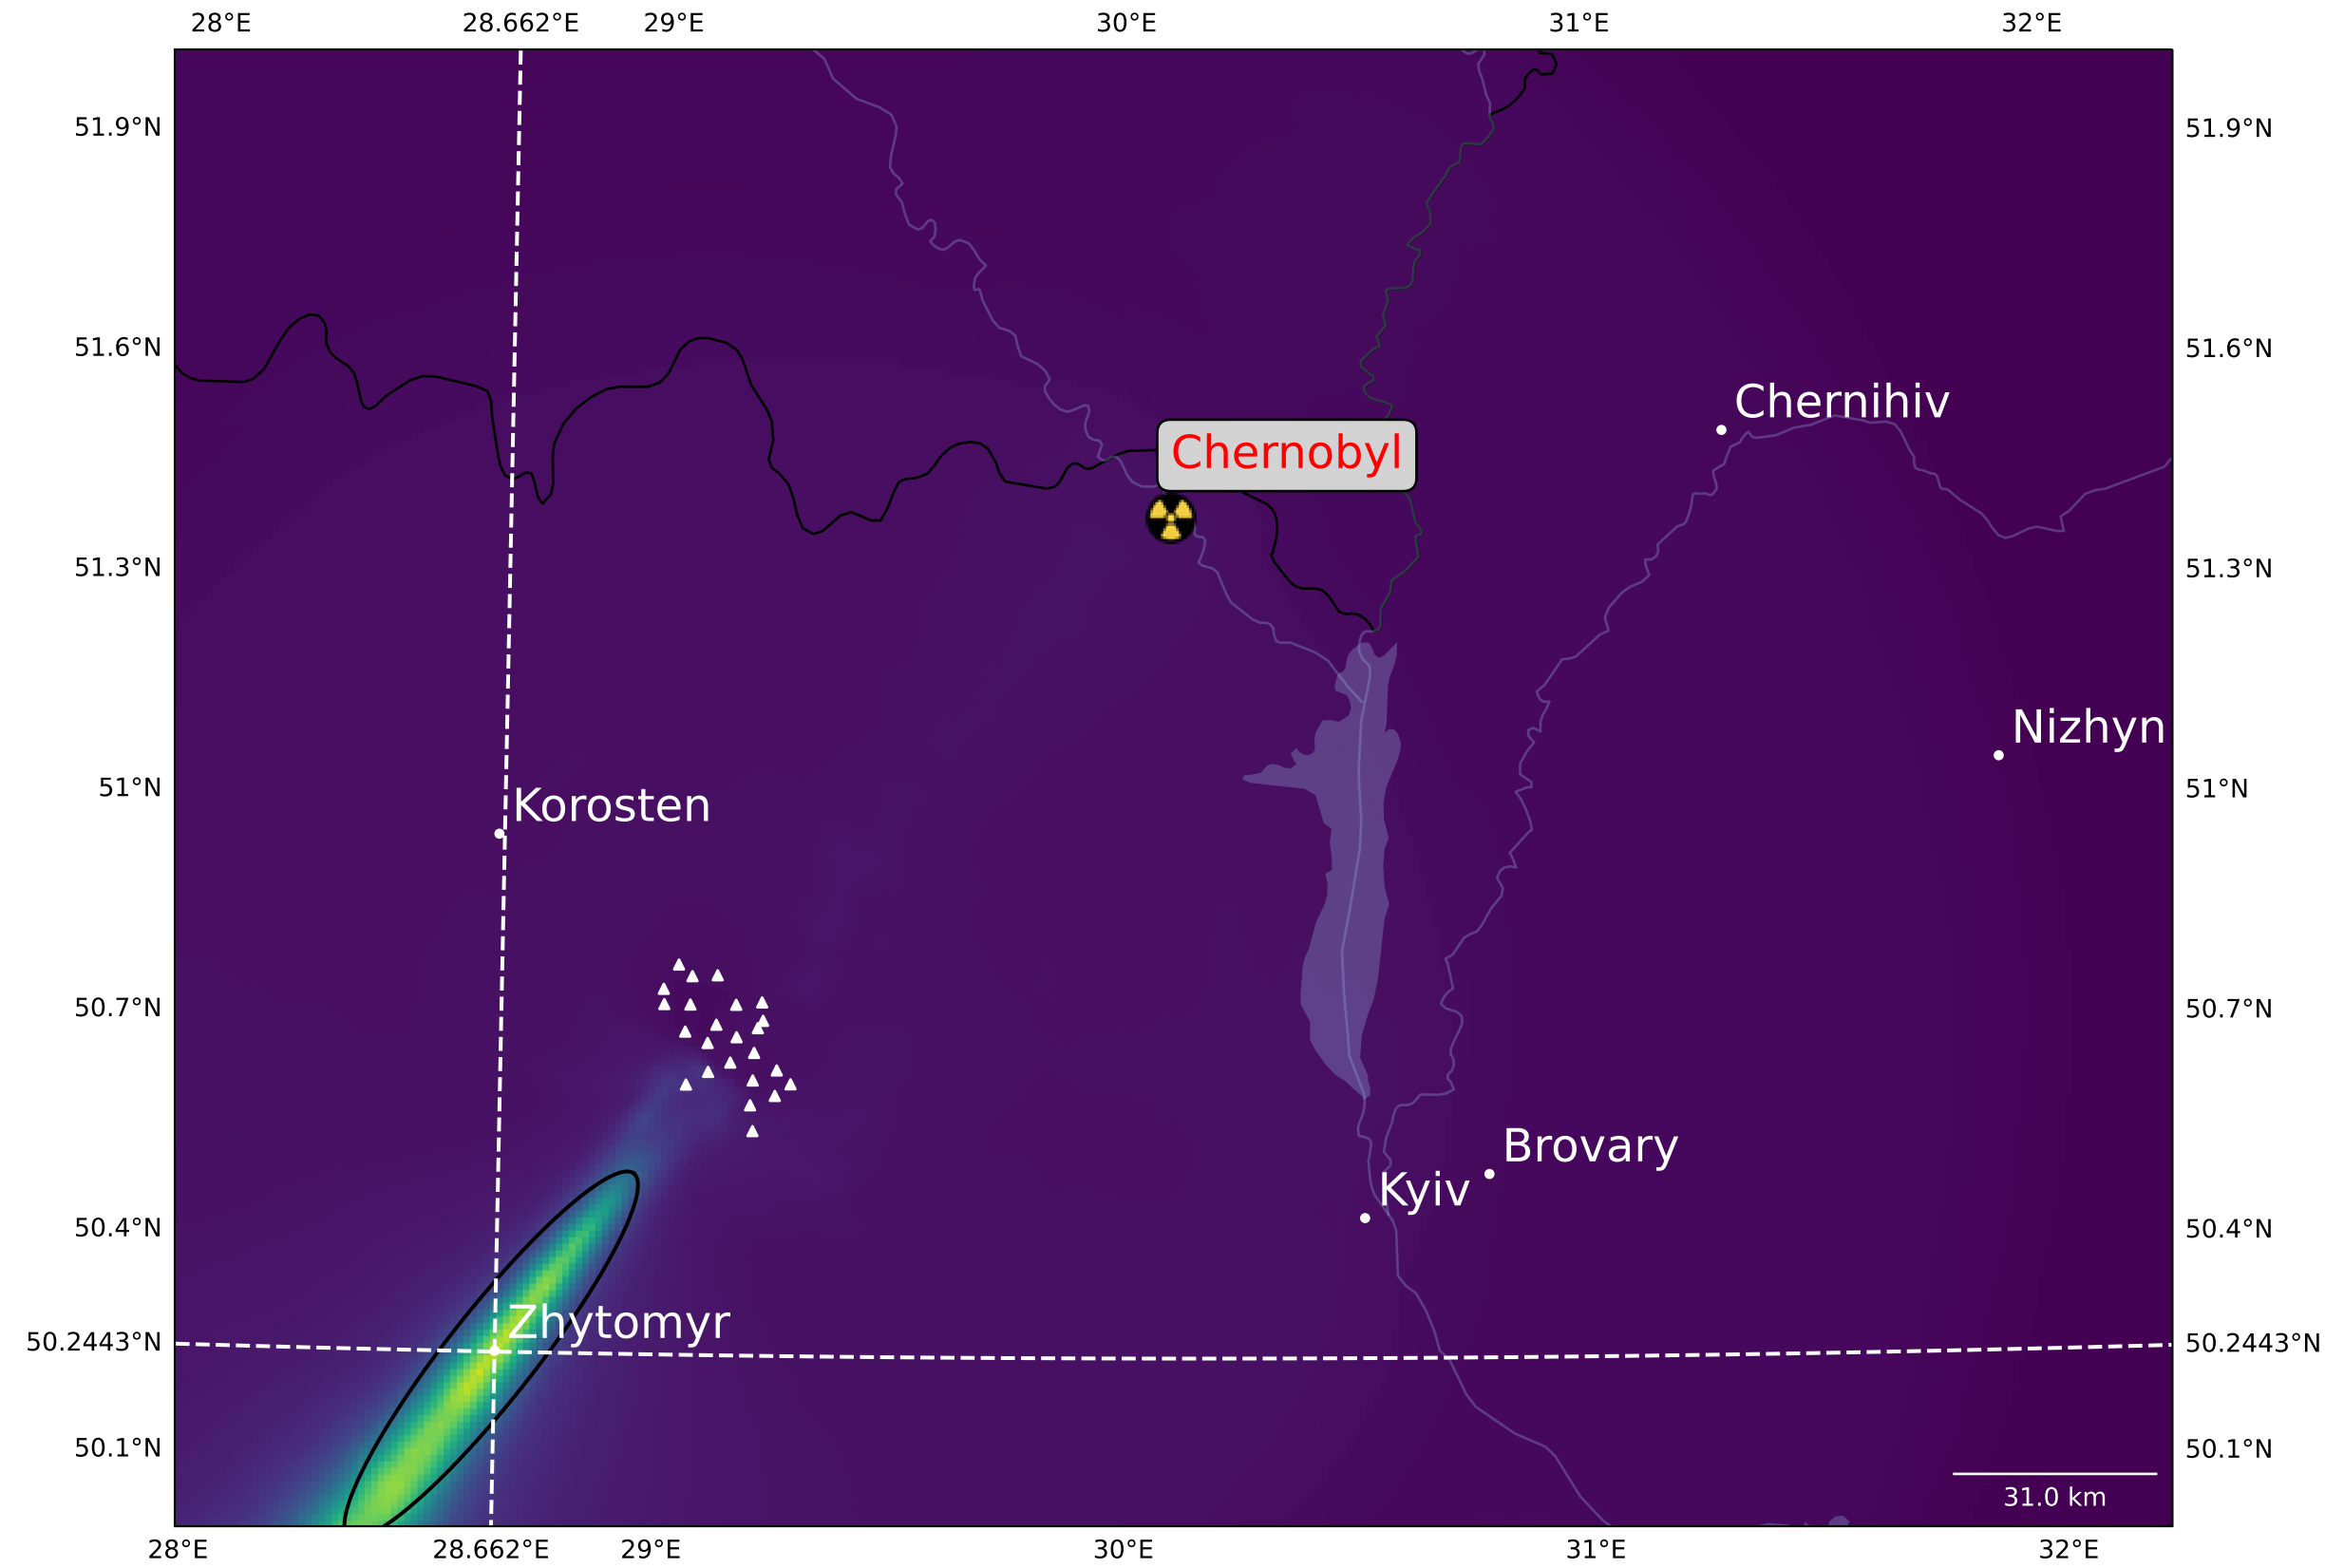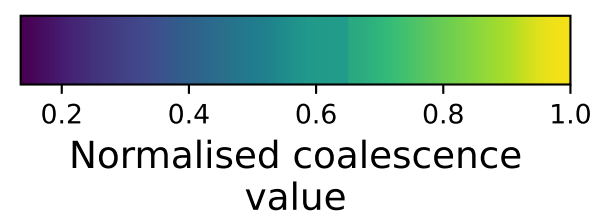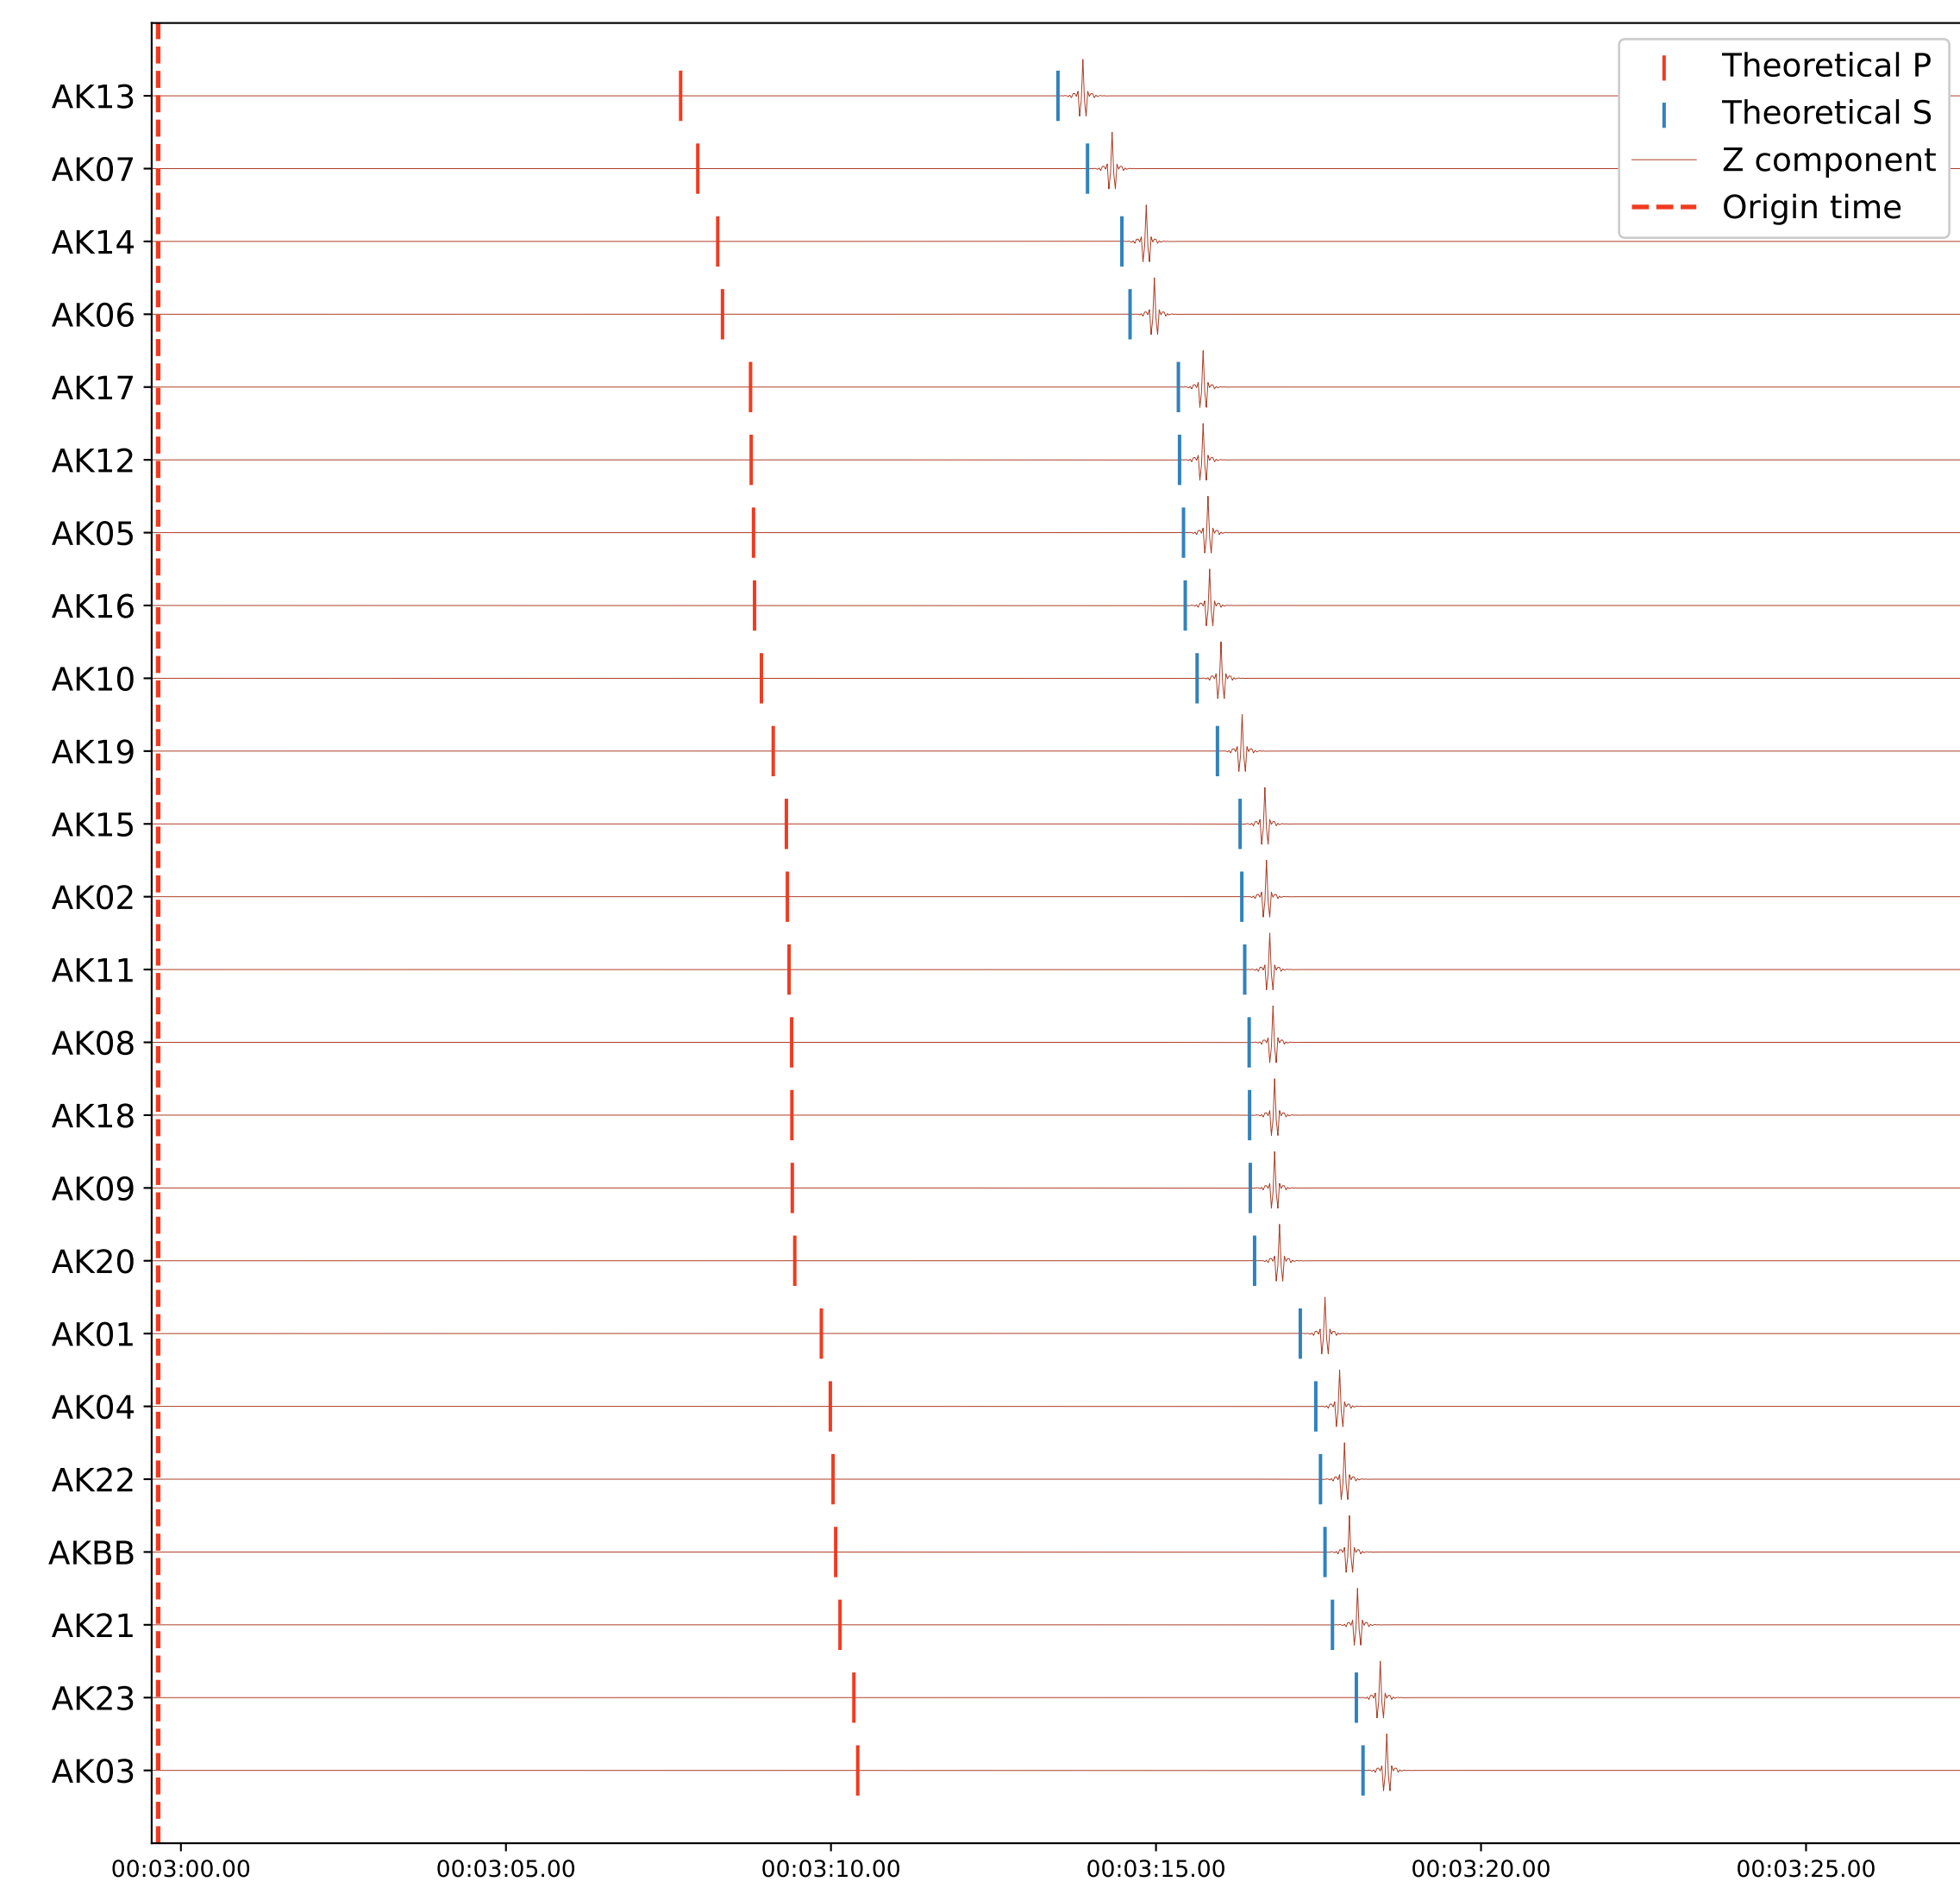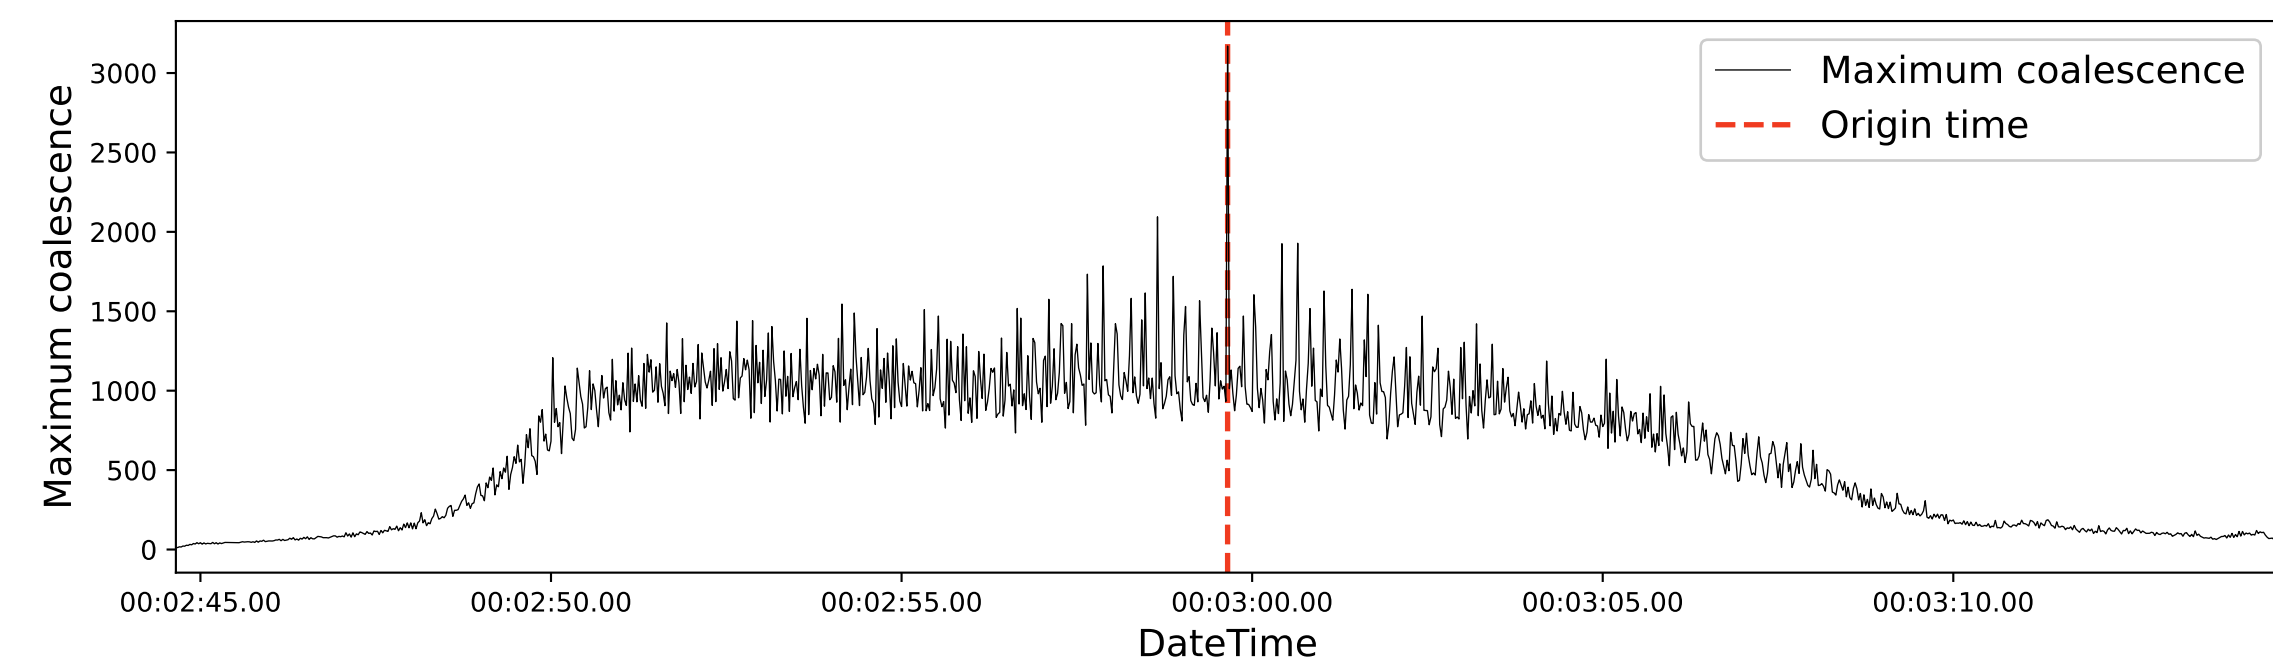

# Zhytomyr point spread function

Origin time: 2022-01-01 00:02:59.650

Hypocentre: 50.2443°N  
28.662°E

Location error: 0.00 km

Uncertainty ellipse: 1.40 km (semi-major axis)  
0.71 km (semi-minor axis)

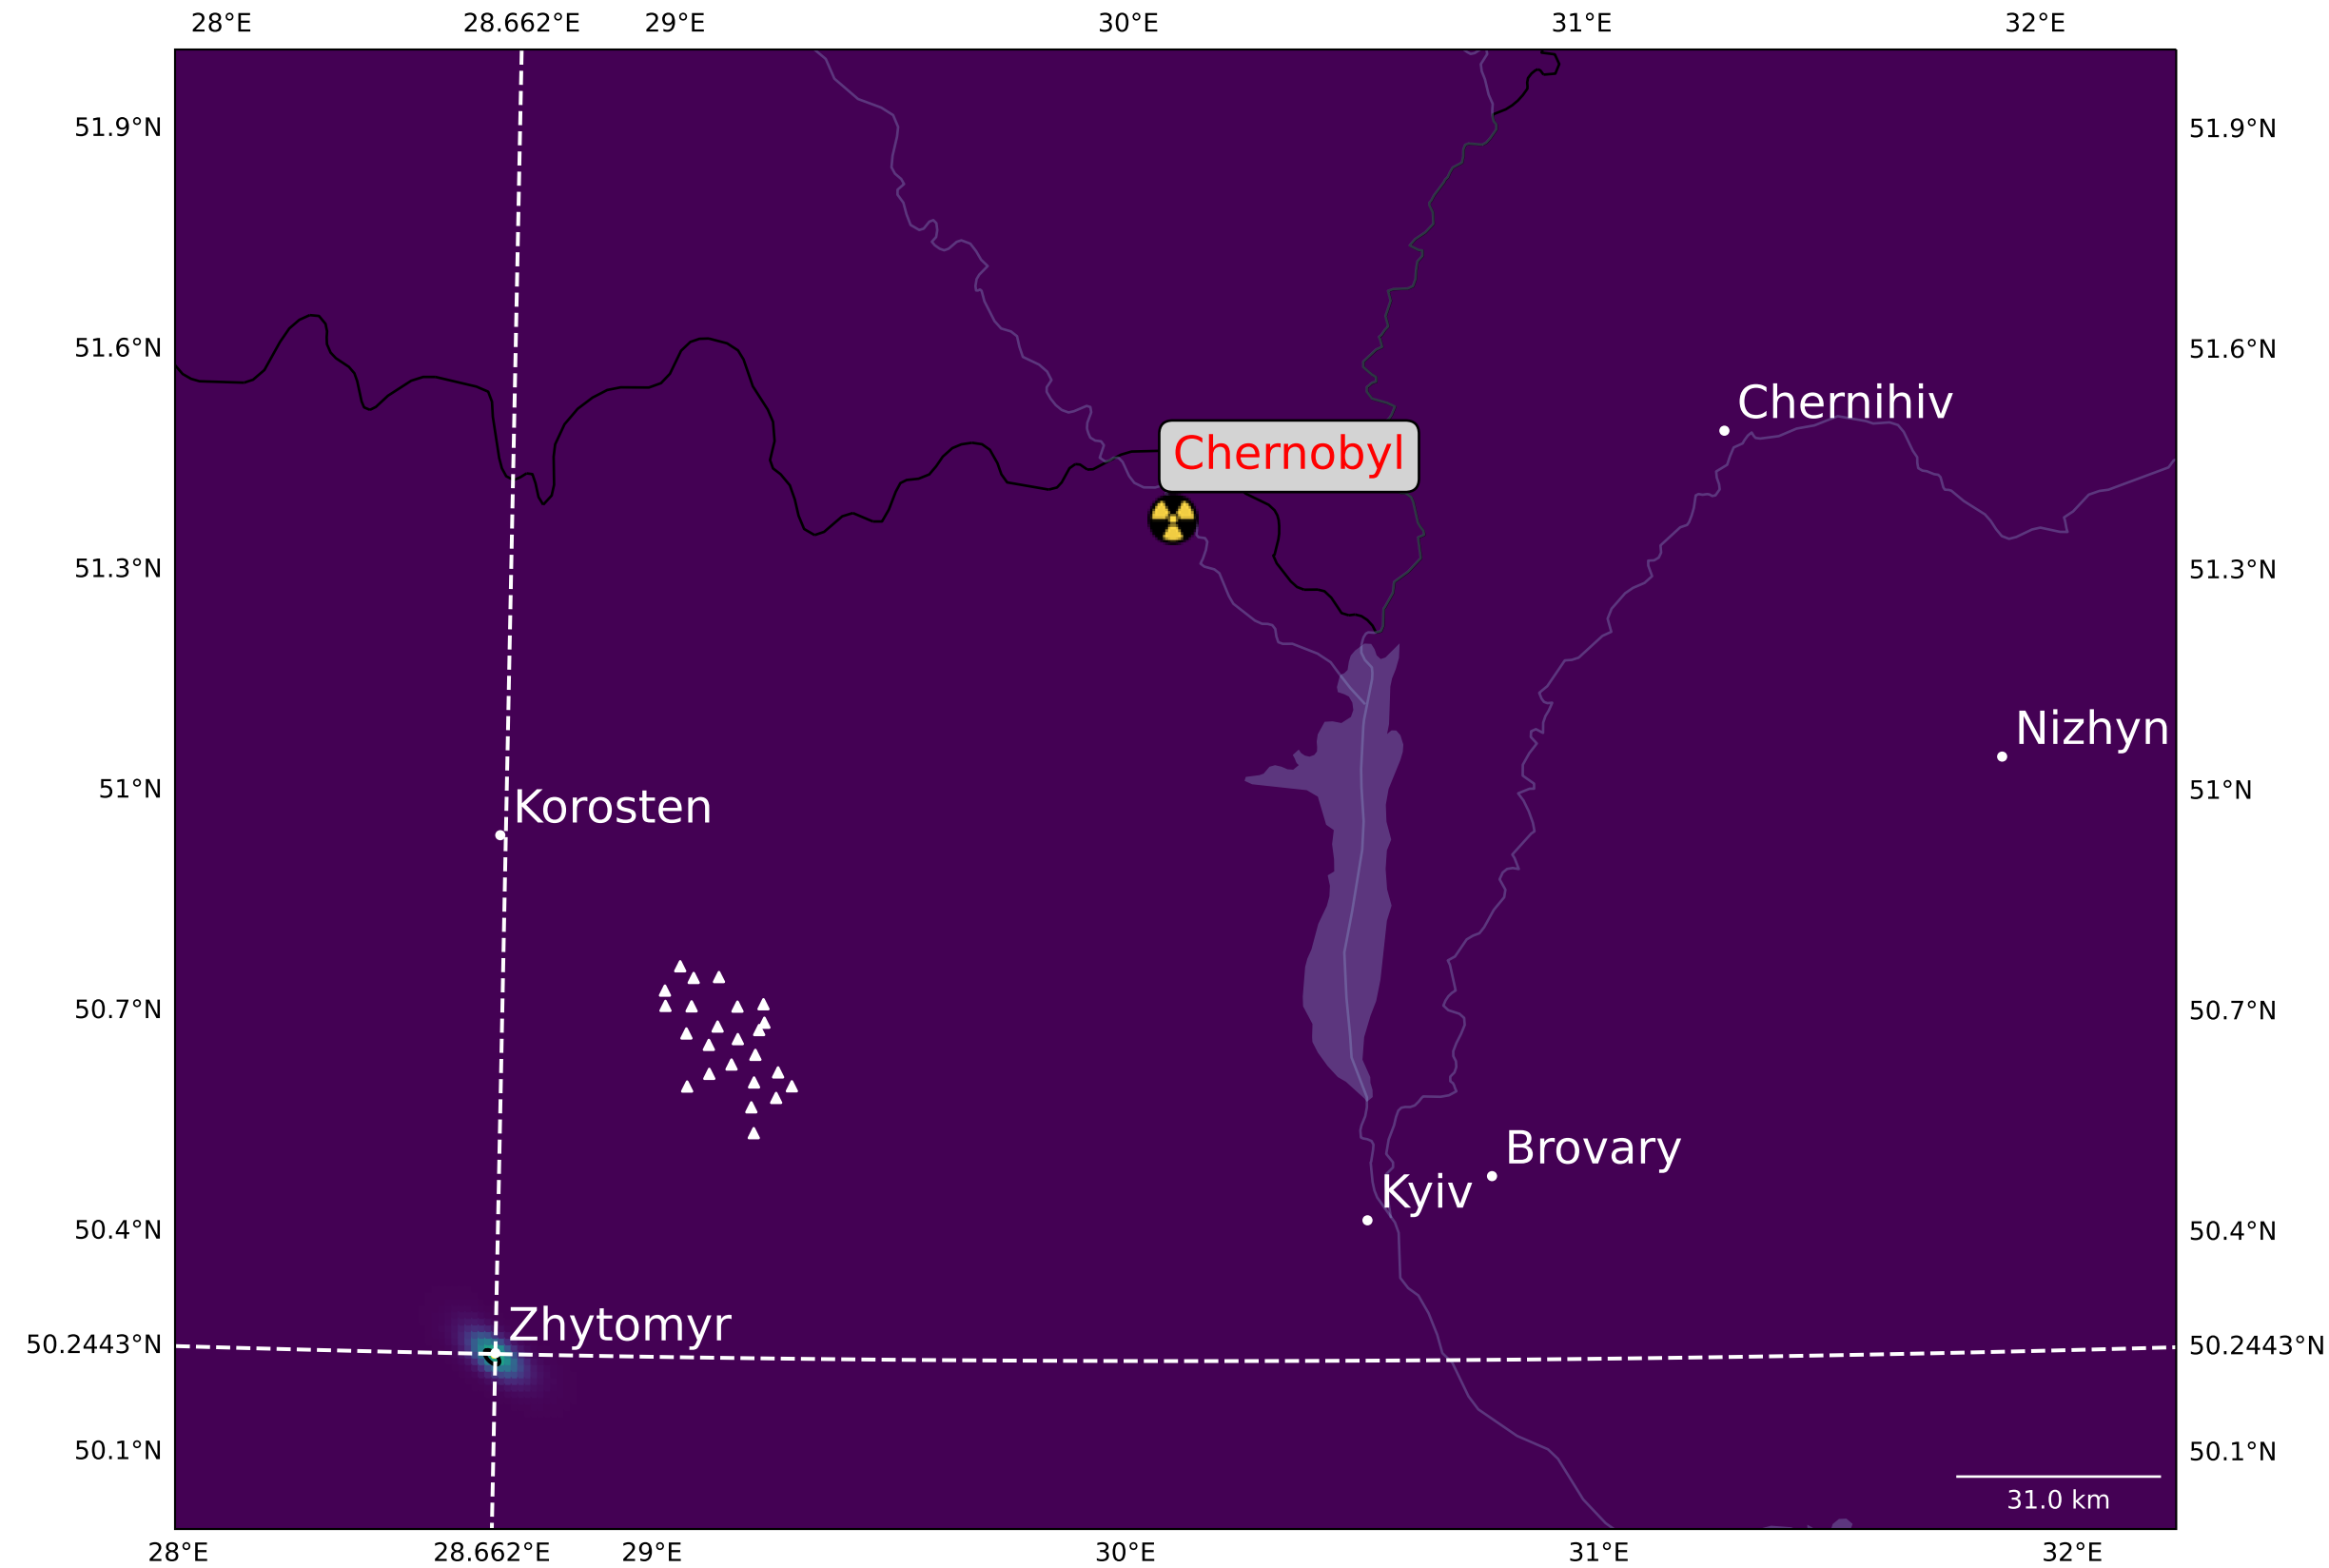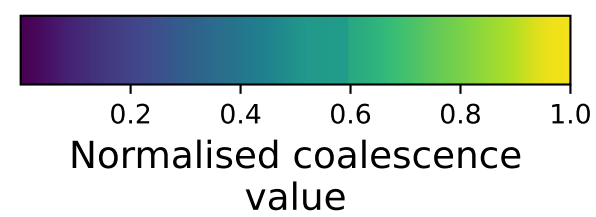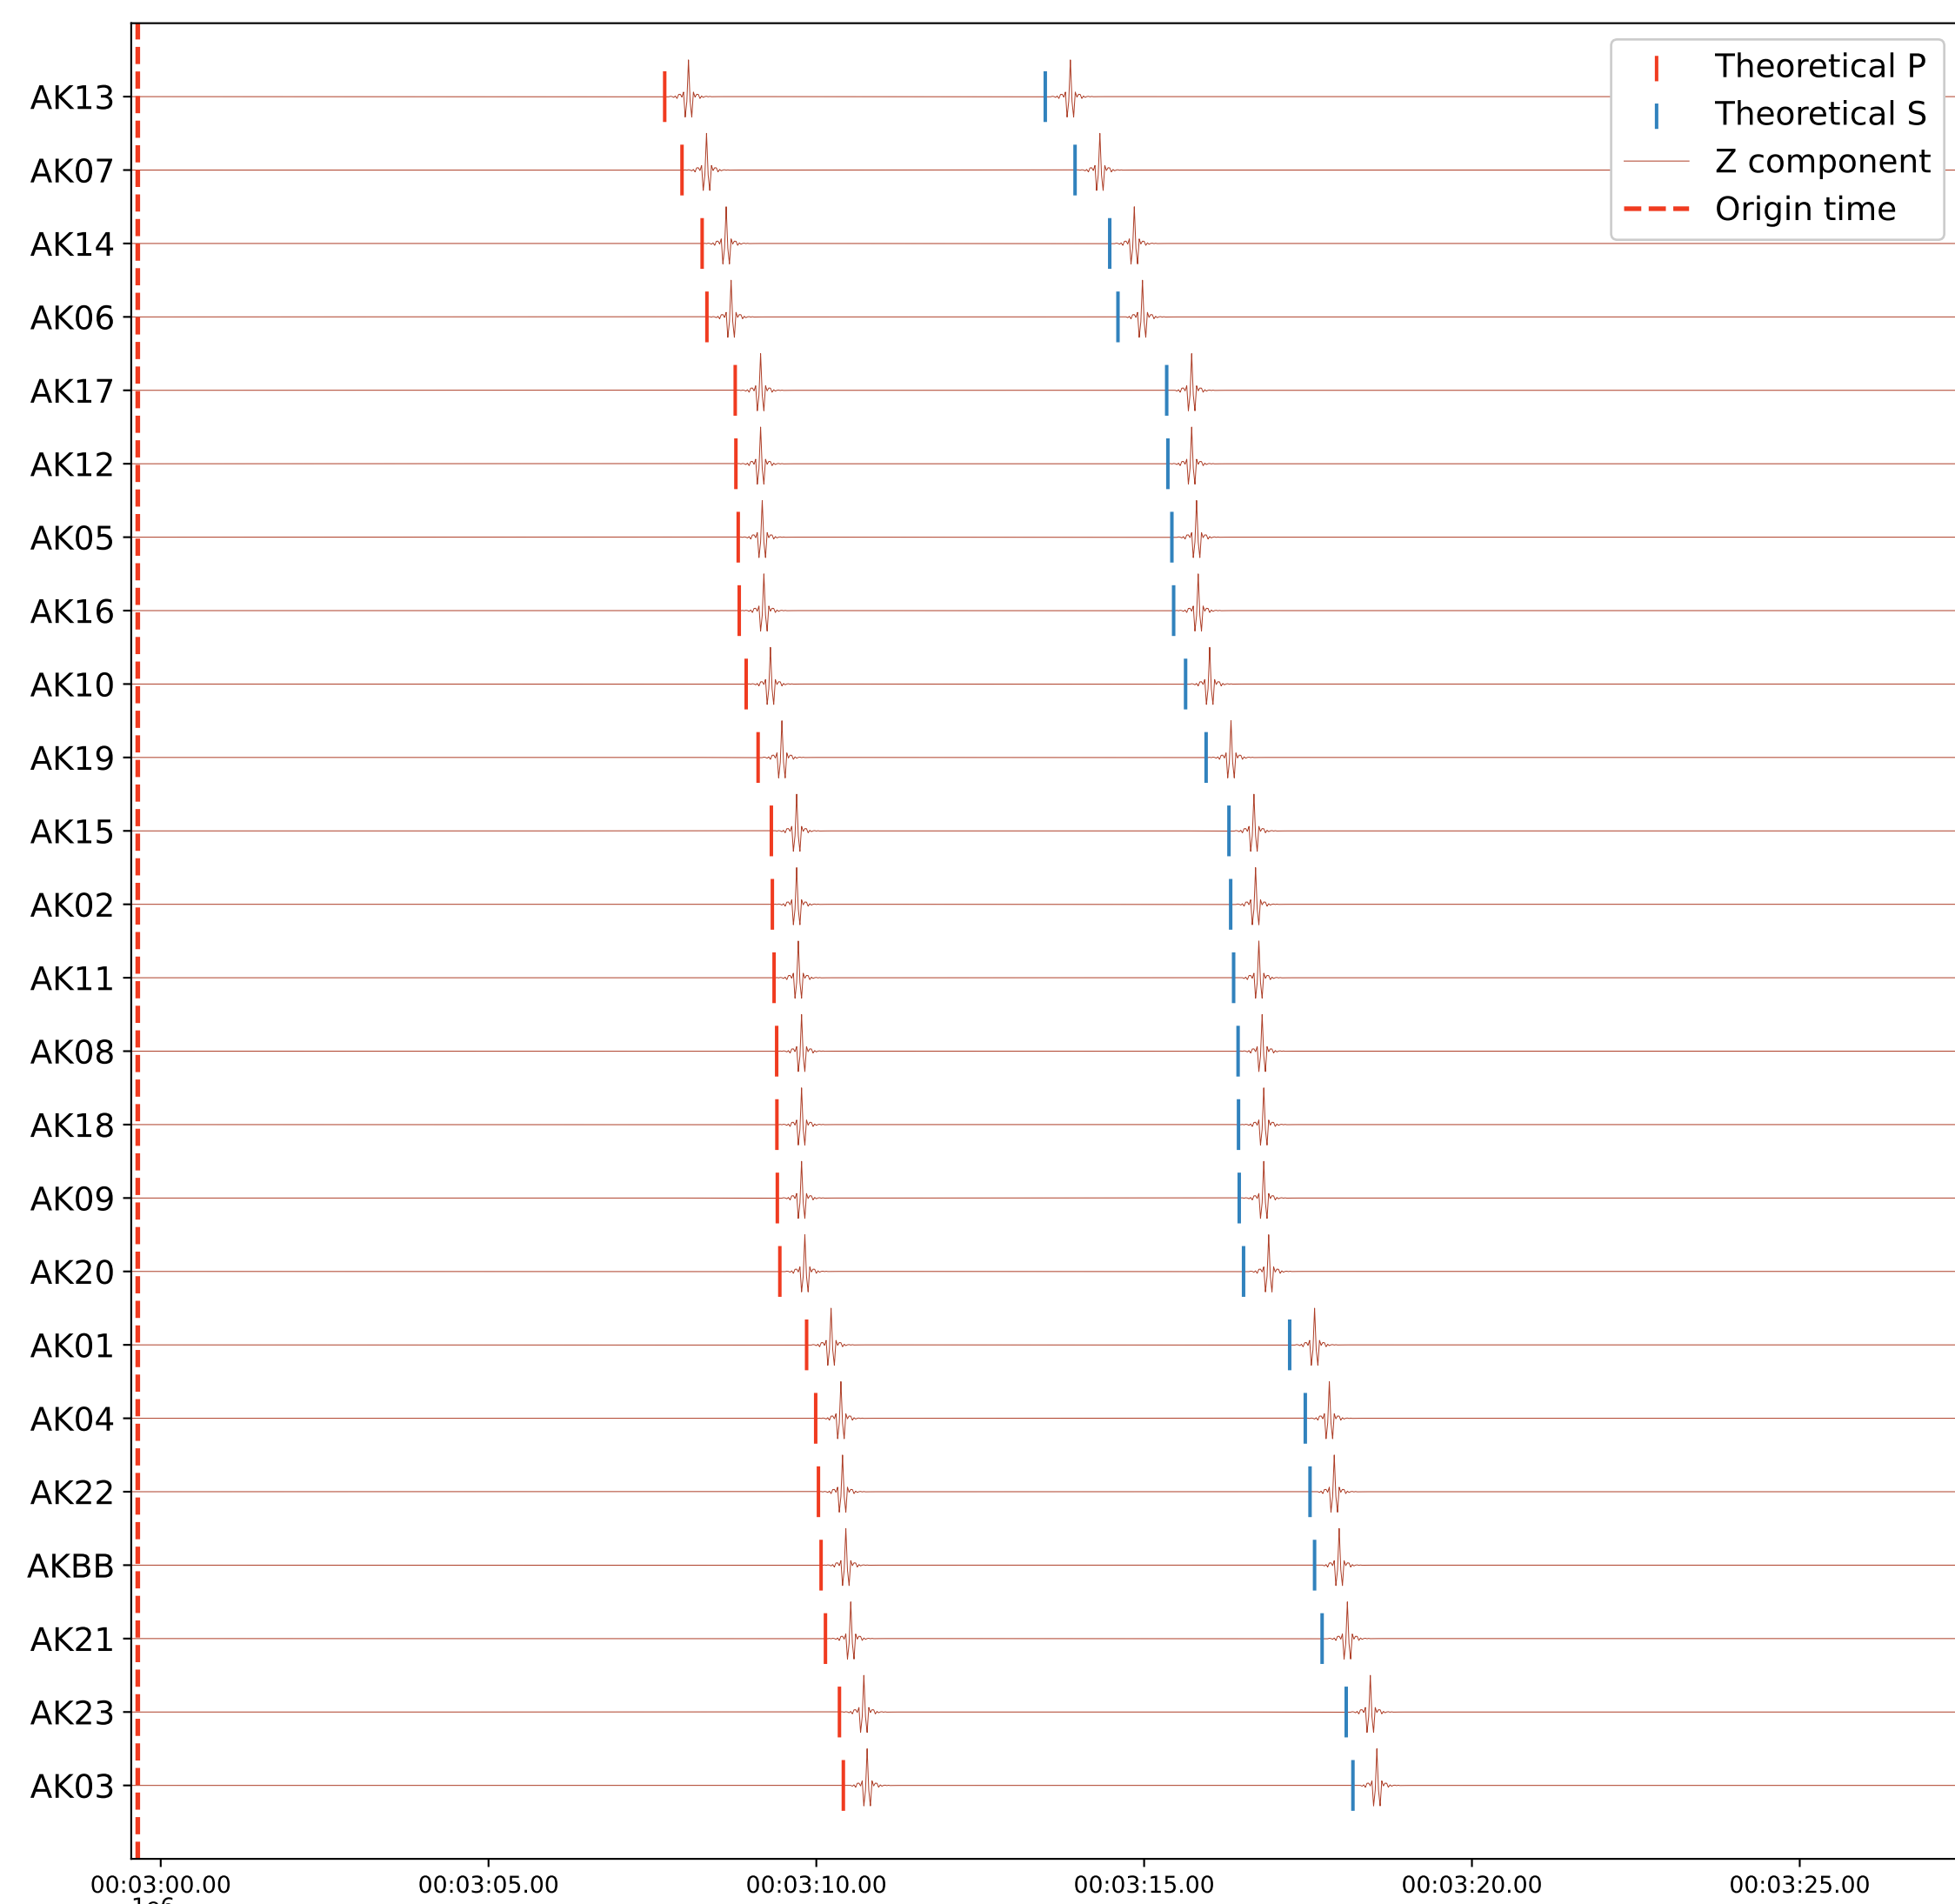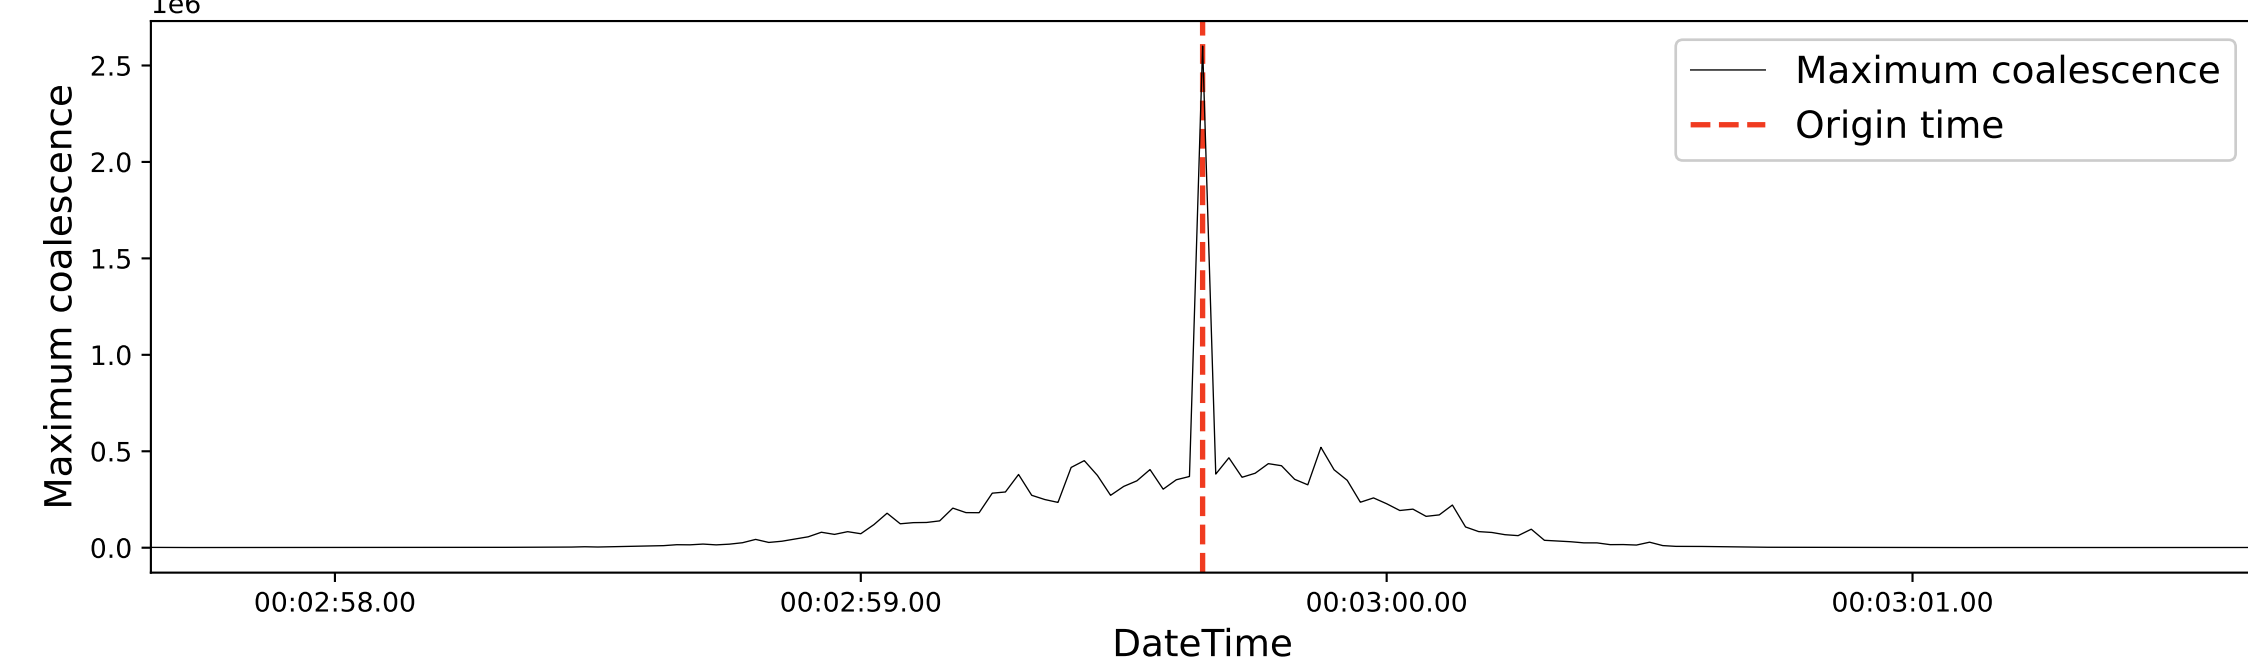

Supplement: 41586_2023_6416_MOESM1_ESM.pdf [file 41586_2023_6416_MOESM1_ESM.pdf]
